# Supplementary material for: The relationship between physician burnout and quality of healthcare in terms of safety and acceptability: a systematic review
Source: PubMed Central journal article supplement — BMJ Open. 2017 Jun 21;7(6):e015141. doi: 10.1136/bmjopen-2016-015141 (PMC5734243; doi:10.1136/bmjopen-2016-015141), 2017-06-21
Supplement: bmjopen-2016-015141.draft_revisions.pdf [file bmjopen-2016-015141.draft_revisions.pdf]

# BMJ Open

## A Systematic Review of the Relationship between Physician Burnout and Safety-related and Acceptability-related Quality of Healthcare

|                                 |                                                                                                                                                                                                                                                                                                                                                                                                                                                   |
|---------------------------------|---------------------------------------------------------------------------------------------------------------------------------------------------------------------------------------------------------------------------------------------------------------------------------------------------------------------------------------------------------------------------------------------------------------------------------------------------|
| Journal:                        | <i>BMJ Open</i>                                                                                                                                                                                                                                                                                                                                                                                                                                   |
| Manuscript ID                   | bmjopen-2016-015141                                                                                                                                                                                                                                                                                                                                                                                                                               |
| Article Type:                   | Research                                                                                                                                                                                                                                                                                                                                                                                                                                          |
| Date Submitted by the Author:   | 11-Nov-2016                                                                                                                                                                                                                                                                                                                                                                                                                                       |
| Complete List of Authors:       | Dewa, C; University of California Davis School of Medicine, Dept of Psychiatry and Behavioral Sciences<br>Loong, Desmond; Centre for Addiction and Mental Health, Centre for Research on Employment and Workplace Health<br>Bonato, Sarah; Centre for Addiction and Mental HealthCentre for Addiction and Mental Health, Library Services<br>Trojanowski, Lucy; Centre for Addiction and Mental HealthCentre for Addiction and Mental Health, SER |
| <b>Primary Subject Heading</b>: | Mental health                                                                                                                                                                                                                                                                                                                                                                                                                                     |
| Secondary Subject Heading:      | Health policy, Health services research                                                                                                                                                                                                                                                                                                                                                                                                           |
| Keywords:                       | burnout, physicians, quality of care                                                                                                                                                                                                                                                                                                                                                                                                              |
|                                 |                                                                                                                                                                                                                                                                                                                                                                                                                                                   |

SCHOLARONE™  
Manuscripts

Only

1  
2  
3  
4 **A Systematic Review of the Relationship between Physician Burnout and Safety-related**  
5 **and Acceptability-related Quality of Healthcare**  
6  
7

8  
9 Carolyn S. Dewa <sup>1,2§</sup>, Desmond Loong <sup>2</sup>, Sarah Bonato <sup>3</sup>, Lucy Trojanowski <sup>2</sup>  
10  
11

12 <sup>1</sup>University of California, Davis, Department of Psychiatry and Behavioral Sciences, Grange  
13 Building, 2103 Stockton Boulevard, Sacramento, California 95817, USA

14 <sup>2</sup>Centre for Addiction and Mental Health, Centre for Research on Employment and Workplace  
15 Health, 33 Russell Street, Toronto, M5S 2S1, Canada

16 <sup>3</sup>Library Services, Centre for Addiction and Mental Health, 33 Russell Street, Toronto, M5S 2S1,  
17 Canada  
18  
19

20 §Corresponding author:

21 Carolyn S. Dewa, MPH, PhD  
22 Professor, University of California, Davis  
23 Department of Psychiatry and Behavioral Sciences  
24 Grange Building, 2103 Stockton Boulevard  
25 Sacramento, California 95817 USA  
26 (916) 703-5656  
27 e-mail: csdewa@ucdavis.edu  
28  
29  
30  
31

32 Keywords: burnout, physicians, quality of healthcare  
33

34 Word count: 4716

35 Number of figures: 2

36 Number of tables: 3

37 Number of references: 55

38 Number of supplementary files: 2  
39  
40  
41  
42  
43  
44  
45  
46  
47  
48  
49  
50  
51  
52  
53  
54  
55  
56  
57  
58  
59  
60

# A Systematic Review of the Relationship between Physician Burnout and Safety-related and Acceptability-related Quality of Healthcare

## Abstract

**Objectives.** This study reviews the current state of the published peer-reviewed literature related to physician burnout and two quality of care dimensions. The purpose of this systematic literature review is to address the question, “How does physician burnout affect the quality of healthcare related to the dimensions of acceptability and safety?”

**Design.** Using a multi-phase screening process, this systematic literature review was based on publically available peer-reviewed studies. Five electronic databases were searched: (1) Medline Current, (2) Medline In-process, (3) PsycINFO, (4) Embase and (5) Web of Science.

**Setting.** The focus is on physicians practicing in civilian settings.

**Participants.** Physicians who are in practice and have completed training.

**Primary and secondary outcome measures.** Quality of healthcare related to acceptability (i.e., patient satisfaction, physician communication, physician attitudes) and safety (i.e., minimizing risks or harm to patients)

**Results.** 3255 unique citations were identified. Of these, 10 articles were included in the review. One of the 10 studies was rated as having low risk of bias and 9 as having moderate risk. Three studies were conducted in North America; four in Europe, one in the Middle East, and two in East Asia. Results of this systematic literature review suggest there is moderate evidence that burnout is associated with safety-related quality of care. Because of the variability in the way patient acceptability-related quality of care was measured and the inconsistency in study findings, the evidence supporting the relationship between burnout and patient acceptability-related quality of care is less strong.

**Conclusions.** The focus on direct care-related quality highlights additional ways that physician burnout affects the healthcare system. These studies can help to inform decisions about how to improve patient care by addressing physician burnout. Continued work looking at the relationship between dimensions of acceptability-related quality of measures and burnout is needed to advance the field.

## ARTICLE SUMMARY

### STRENGTHS AND LIMITATIONS OF THIS STUDY:

- Few studies have examined the current state of knowledge about the relationship between physician burnout and the patient safety and acceptability dimensions of quality of care.
- This systematic literature review employed a broad search of five electronic databases: (1) Medline Current, (2) Medline In-process, (3) PsycINFO, (4) Embase and (5) Web of Science. A manual search was also conducted. In total, 3255 unique citations were identified and reviewed by two reviewers.
- The results of the search identified 10 papers that met inclusion criteria; they reported on studies conducted in a variety of countries suggesting that the question of the impact of physician burnout on quality of care is of interest in health systems globally.
- There was variability among the identified studies with respect to outcome measures and reporting of population characteristics.
- The results of this body of literature could be strengthened by the use of longitudinal study designs.

## **A Systematic Review of the Relationship between Physician Burnout and Safety-related and Acceptability-related Quality of Healthcare**

Reports from around the world indicate that about one-third to one-half of physicians experience at least one dimension of burnout.<sup>1-5</sup> Burnout has been conceptualized as a syndrome consisting of three dimensions: emotional exhaustion (EE), depersonalization (DP) and low personal accomplishment (PA).<sup>6</sup> Maslach et al.<sup>7</sup> defines EE as referring to “feelings of being overextended and depleted of one’s emotional and physical resources.” DP is also referred to as cynicism and they define it as “a negative, callous, or excessively detached response to various aspects”.<sup>7</sup> PA is also referred to as professional efficacy and “it refers to feelings of incompetence and a lack of achievement and productivity at work”.<sup>7</sup> Burnout has been observed to affect personal well-being through low job satisfaction<sup>8-10</sup> and decreased mental health.<sup>11</sup>

Because physicians play an integral role in the healthcare system, the effects of physician burnout are not limited to the physicians experiencing it. Rather, physician burnout potentially impacts the entire healthcare system. For example, a recent systematic literature review reported a negative relationship between burnout and productivity (i.e., early retirement, work cutback, and quitting).<sup>12</sup> The impact of productivity loss related to burnout could lead to fewer available healthcare resources that in turn, can result in healthcare service waitlists. One estimate of the costs of physician work cutback and early retirement related to burnout suggests it totals to at least CAD \$213 million in patient services losses.<sup>8</sup>

This raises another question about physicians who continue to practice despite experiencing burnout. Does burnout affect their practice? There is evidence that physician burnout is also related to decreased quality of patient care.<sup>5</sup> The World Health Organization (WHO)<sup>13</sup> and the Institute of Medicine (IOM)<sup>14</sup> suggest that there are six dimensions for quality of healthcare care: effectiveness, efficiency, accessibility, equitability, acceptability, and safety.

1  
2  
3 The purpose of this systematic literature review is to address the question, “How does  
4 physician burnout affect the quality of healthcare related to the dimensions of acceptability and  
5 safety?” In this review, we focus on the two dimensions of quality – acceptability (i.e., patient  
6 satisfaction, perceived quality of care, and communication) and safety (i.e., minimizing risks or  
7 harm to patients). We choose these two dimensions because they reflect the quality of patient-  
8 physician interactions.<sup>15</sup> That is, if a clinician’s wellbeing is compromised, their patient  
9 interactions may also be negatively affected.<sup>16</sup> In contrast, effectiveness, efficiency,  
10 accessibility, equitability reflect the systems (i.e., infrastructure, information technology,  
11 payment policies) in which practice is conducted.<sup>14</sup>

## 22 **Background**

23  
24  
25  
26 There has been growing interest in the relationship between physician wellbeing and  
27 quality of patient care. Although the WHO<sup>13</sup> and IOM<sup>14</sup> identify six dimensions of quality of  
28 healthcare care, attention has focused on the dimension of patient safety. Recently, there have  
29 been three published reviews examining the relationship between clinician and physician  
30 wellbeing and patient safety.<sup>17-19</sup> However, each of these published reviews answered questions  
31 that were different from the one addressed in our review. Because they sought to answer  
32 different questions, they employed different search strategies and inclusion/exclusion criteria  
33 from ours. Consequently, they included different articles from ours. For example, Hall et al.’s<sup>18</sup>  
34 review does not include seven articles that are included in our systematic review. Among  
35 these, there are six articles related to acceptability and one article related to patient safety that  
36 were not included in Hall et al.’s<sup>18</sup> review. Furthermore, there are only four papers that overlap;  
37 one is on acceptability and three on patient safety. In comparison to de Jong et al.’s review,<sup>17</sup>  
38 our review has nine articles that are unique to our systematic review; six are related to  
39  
40  
41  
42  
43  
44  
45  
46  
47  
48  
49  
50  
51  
52  
53  
54  
55  
56  
57  
58  
59  
60

1  
2  
3 acceptability and three to patient safety. None of the articles included in our review were  
4 included in Williams and Skinner's.<sup>19</sup> Thus, our review includes papers that have not been  
5 considered together to look at quality of care related to physician interactions with patients and  
6 the impact of burnout on physicians.  
7  
8  
9  
10

11  
12 In addition, none of the published reviews considers the quality of care dimension of  
13 acceptability for physicians who have completed training. Yet, along with patient safety, this  
14 dimension reflects the quality of interactions between providers and patients. The physician-  
15 patient interactions are one of the fundamental interactions in healthcare.<sup>15,19</sup> Furthermore, the  
16 IOM<sup>14</sup> asserts that the rise in chronic illnesses necessitates quality interactions to enhance the  
17 collaboration between the physician and patient. Quality of physician-patient interactions are  
18 reflected in communication, perceived quality of care, and patient satisfaction.<sup>14,15</sup> It is the  
19 physician-patient interaction that supports the collaboration that will lead to better patient  
20 outcomes.<sup>15</sup>  
21  
22  
23  
24  
25  
26  
27  
28  
29  
30  
31  
32

33 Wallace et al.<sup>16</sup> assert that physician wellbeing could be used as a quality indicator. The  
34 argument could be strengthened by also understanding how wellbeing is associated with the  
35 physician-patient interaction-related quality dimensions of safety and acceptability. In particular,  
36 burnout could be a focus because it reflects wellbeing and there are standardized measures to  
37 identify it. Furthermore, it is a facet of wellbeing that can be influenced by organizational  
38 factors and is under the influence of the healthcare system.<sup>16,20,21</sup> Thus, this systematic review of  
39 the literature extends our knowledge about the dimensions of quality of care that reflect  
40 physician interactions with patients and a dimension of wellbeing that is affected by the work  
41 environment.  
42  
43  
44  
45  
46  
47  
48  
49  
50  
51  
52  
53  
54  
55  
56  
57  
58  
59  
60

## METHODS

A systematic review of the literature was reported following the *Preferred Reporting Items for Systematic Reviews and Meta-Analyses* (PRISMA) guidelines.<sup>22</sup> Ethics board review was not sought because this review relied solely on publicly available sources of information.

### Information Sources

Five databases were searched: (1) *Medline Current* (index of biomedical research and clinical sciences journal articles); (2) *Medline In-Process* (index of biomedical research and clinical sciences journal articles awaiting to be indexed into *Medline Current*); (3) *PsycINFO* (an index of journal articles, books, chapters, and dissertations in psychology, social sciences, behavioral sciences, and health sciences); (4) *Embase* (index of biomedical research, and abstracts from biomedical, drug and medical device conferences); and (5) *Web of Science* (index of journal articles, editorially selected books and conference proceedings in life sciences and biomedical research).

### Search Strategy

Collaborating with the professional health science librarian (SB) member of this research team, search strategies were developed and tailored for each database following the Peer Review of Electronic Search Strategies (PRESS) guidelines<sup>23</sup> (Table 1). The searches were conducted between August – October 2015. The OVID platform was used to search *Medline Current*, *Medline In-Process*, *PsycINFO*, and *Embase*. *Web of Science* was searched using the Thomson Reuters search interface. The search period covered January 2002 – September 2015; all searches were limited to English language journals. The time frame was chosen to represent the current healthcare environments in which physicians are practicing. Searches sought to identify articles about practicing physicians regardless of specialty working in civilian settings (i.e., non-



military settings). In this review, the physician search included: allergists, anesthesiologists, cardiologists, clinical pharmacologists, clinical toxicologists, dermatologists, doctors, endocrinologists, gastroenterologists, gynecologists, hematologists, immunologists, medical biochemists, medical geneticists, medical microbiologists, nephrologists, neurologists, neuropathologists, neuroradiologists, occupational physicians, oncologists, ophthalmologists, pathologists, pediatricians, physicians, psychiatrists, radiologists, rheumatologists, surgeons, and urologists. The search strategy did not seek to exclude residents and medical students. Rather, a broad search strategy was employed to increase the likelihood that all studies on physician burnout would be found. The reference lists of all accepted full-text articles were hand searched.

**Table 1. Search terms used in search strategy**

| Database           | Search Terms                                                                                                                                                                                                                                                                                                                                                                                                                                                                                                                                                                                                                                                                                                                                                                                                                                                                                                                                                                                                                                                                                                                                                                                                                                                                                                                                                                                                                                                                                                                                                                                                                                                                                                                                                                                                                                                                                                                                                                                                                                                                                                                                                                                                                                                                                                                                                                                                                                                                                                                                                                                                                                                                                                                                                                                                                                                                                                                                                                                                                                                                                                                                                                                                                                                                                                                                                                                                                                                                                                                                                                                                                                                                                                                                                                                                                                                                                                                                                                                                                                                                                                                                                                                                                                                                                                                                                                                                                                                                                                                                                   |
|--------------------|----------------------------------------------------------------------------------------------------------------------------------------------------------------------------------------------------------------------------------------------------------------------------------------------------------------------------------------------------------------------------------------------------------------------------------------------------------------------------------------------------------------------------------------------------------------------------------------------------------------------------------------------------------------------------------------------------------------------------------------------------------------------------------------------------------------------------------------------------------------------------------------------------------------------------------------------------------------------------------------------------------------------------------------------------------------------------------------------------------------------------------------------------------------------------------------------------------------------------------------------------------------------------------------------------------------------------------------------------------------------------------------------------------------------------------------------------------------------------------------------------------------------------------------------------------------------------------------------------------------------------------------------------------------------------------------------------------------------------------------------------------------------------------------------------------------------------------------------------------------------------------------------------------------------------------------------------------------------------------------------------------------------------------------------------------------------------------------------------------------------------------------------------------------------------------------------------------------------------------------------------------------------------------------------------------------------------------------------------------------------------------------------------------------------------------------------------------------------------------------------------------------------------------------------------------------------------------------------------------------------------------------------------------------------------------------------------------------------------------------------------------------------------------------------------------------------------------------------------------------------------------------------------------------------------------------------------------------------------------------------------------------------------------------------------------------------------------------------------------------------------------------------------------------------------------------------------------------------------------------------------------------------------------------------------------------------------------------------------------------------------------------------------------------------------------------------------------------------------------------------------------------------------------------------------------------------------------------------------------------------------------------------------------------------------------------------------------------------------------------------------------------------------------------------------------------------------------------------------------------------------------------------------------------------------------------------------------------------------------------------------------------------------------------------------------------------------------------------------------------------------------------------------------------------------------------------------------------------------------------------------------------------------------------------------------------------------------------------------------------------------------------------------------------------------------------------------------------------------------------------------------------------------------------------------------------|
| Medline<br>Current | <p>[exp Burnout, Professional/ OR burnout.mp. OR (burnout adj3 effect\$.mp.) AND [exp Physicians/ OR exp Psychiatry/ OR allergist\$.mp. OR anesthesiologist\$.mp. OR cardiologist\$.mp. OR clinical pharmacologist\$.mp. OR clinical toxicologist\$.mp. OR dermatologist\$.mp. OR doctor\$.mp. OR endocrinologist\$.mp. OR gastroenterologist\$.mp. OR gynecologist\$.mp. OR hematologist\$.mp. OR immunologist\$.mp. OR medical biochemist\$.mp. OR medical geneticist\$.mp. OR medical microbiologist\$.mp. OR nephrologist\$.mp. OR neurologist\$.mp. OR neuropathologist\$.mp. OR neuroradiologist\$.mp. OR occupational physician\$.mp. OR oncologist\$.mp. OR ophthalmologist\$.mp. OR pathologist\$.mp. OR pediatrician\$.mp. OR physician\$.mp. OR psychiatrist\$.mp. OR radiologist\$.mp. OR rheumatologist\$.mp. OR surgeon\$.mp. OR urologist\$.mp.] AND [exp Diagnostic Errors/ OR exp Medical Errors/ OR exp Medication Errors/ OR exp "Quality of Health Care"/ OR exp Quality Assurance, Health Care/ OR misdiag\$.mp. OR (diagnos\$ adj3 error\$.mp. OR (medical\$ adj3 error\$.mp. OR (medication\$ adj3 error\$.mp. OR (drug\$ adj3 error\$.mp. OR (mistak\$ adj3 medic\$.mp. OR (surgic\$ adj3 error\$.mp. OR (quality\$ adj3 health\$ adj3 care\$.mp. OR (quality\$ adj3 healthcare\$.mp. OR (quality\$ adj3 of adj3 care\$.mp. OR exp Professional Competence/ OR (professional\$ adj3 competenc\$.mp. OR (technical\$ adj3 expertise\$.mp. OR (expertise\$ adj3 generaliz\$.mp. OR professionalism\$.mp. OR exp Treatment Outcome/ OR (treat\$ adj3 outcome\$.mp. OR (patient\$ adj3 outcome\$.mp. OR exp Professional Impairment/ OR (impair\$ adj3 physician\$.mp. OR (impair\$ adj3 doctor\$.mp. OR (disruptive\$ adj3 behav\$.mp. OR exp Safety/ OR safe\$.mp. OR exp Risk/ OR risk\$.mp. OR exp Patient Satisfaction/ OR (patient\$ adj3 satisf\$.mp. OR (client\$ adj3 satisf\$.mp. OR exp Professional-Patient Relations/ OR (professional\$ adj3 patient\$ adj3 relation\$.mp. OR (client\$ adj3 contact\$.mp. OR exp Physician-Patient Relations/ OR (physician\$ adj3 patient\$ adj3 relation\$.mp. OR (doctor\$ adj3 patient\$ adj3 relation\$.mp. OR exp Communication/ OR communicat\$.mp. OR misinform\$.mp. OR exp Health Communication/ OR exp "Attitude of Health Personnel"/ OR attitude\$.mp. OR exp Clinical Competence/ OR (clinical\$ adj3 competenc\$.mp. OR (clinical\$ adj3 skill\$.mp. OR exp Patient-Centered Care/ OR (patient\$ adj3 cent\$ adj3 care\$.mp. OR (patient\$ adj3 focus\$ adj3 care\$.mp. OR exp Empathy/ OR empath\$.mp. OR exp Patient Care/ OR (patient\$ adj3 care\$.mp. OR (informal\$ adj3 care\$.mp. OR exp "Standard of Care"/ OR (standard\$ adj3 care\$.mp. OR st.fs. [standards - floating subheading] OR exp Self Efficacy/ OR efficacy\$.mp. OR exp Clinical Audit/ OR audit\$.mp. OR exp Medical Audit/ OR (diagnos\$ adj3 mistak\$.mp. OR (medication\$ adj3 mistak\$.mp. OR (drug\$ adj3 mistak\$.mp. OR (surgic\$ adj3 mistak\$.mp. OR exp Safety Management/ OR (program\$ adj3 hazard\$ adj3 surveillance\$.mp. OR (management\$ adj3 safety\$.mp. OR (hazard\$ adj3 control\$.mp. OR (hazard\$ adj3 management\$.mp. OR exp Malpractice/ OR malpractic\$.mp. OR negligenc\$.mp. OR exp Morbidity/ OR morbidity\$.mp. OR exp Postoperative Complications/ OR (postoperative\$ adj3 complication\$.mp. OR exp Cross Infection/ OR (nosocomial\$ adj3 infection\$.mp. OR (hospital\$ adj3 infection\$.mp. OR (cross\$ adj3 infection\$.mp. OR exp Physician's Practice Patterns/ OR (practice\$ adj3 pattern\$ adj3 clinical\$.mp. OR (practice\$ adj3 pattern\$ adj3 physician\$.mp. OR (prescribing\$ adj3 pattern\$ adj3 physician\$.mp. OR (practice\$ adj3 pattern\$ adj3 professional\$.mp. OR (practice\$ adj3 pattern\$ adj3 variation\$.mp. OR (practice\$ adj3 clinical\$ adj3 variation\$.mp. OR (practice\$ adj3 medical\$ adj3 variation\$.mp. OR exp Mortality/ OR (rate\$ adj3 age-specific\$ adj3 death\$.mp. OR (rate\$ adj3 death\$.mp. OR (rate\$ adj3 fatality\$.mp. OR mortality\$.mp. OR exp "Outcome Assessment (Health Care)"/ OR (measure\$ adj3 outcome\$.mp. OR (assessment\$ adj3 outcome\$.mp. OR (research\$ adj3 outcome\$.mp. OR (stud\$ adj3 outcome\$.mp. OR (assessment\$ adj3 patient\$ adj3 outcome\$.mp. OR (research\$ adj3 patient\$ adj3 outcome\$.mp. OR exp Risk Reduction Behavior/ OR exp Risk-Taking/ OR exp "Root Cause Analysis"/ OR (cause\$ adj3 root\$ adj3 analys\$.mp. OR exp "Drug-Related Side Effects and Adverse</p> |

| Database           | Search Terms                                                                                                                                                                                                                                                                                                                                                                                                                                                                                                                                                                                                                                                                                                                                                                                                                                                                                                                                                                                                                                                                                                                                                                                                                                                                                                                                                                                                                                                                                                                                                                                                                                                                                                                                                                                                                                                                                                                                                                                                                                                                                                                                                                                                                                                                                                                                                                                                                                                                                                                                                                                                                                                                                                                                                                                                                                                                                                                                                                                                                                                                                                                                                                                                                                                                                                                                                                                                                                                                                                                                                                                                                                                                                                                                                                                                                                                                                                                                                                                                                                                                                                                                                                                                                                                                                                                                                                                                                                                                                                                                                                                                                                                                                                                                                                                                                                                                                                                                                                                                                                                                                                                                                                                                                                                                                                                                                                                                                            |
|--------------------|-----------------------------------------------------------------------------------------------------------------------------------------------------------------------------------------------------------------------------------------------------------------------------------------------------------------------------------------------------------------------------------------------------------------------------------------------------------------------------------------------------------------------------------------------------------------------------------------------------------------------------------------------------------------------------------------------------------------------------------------------------------------------------------------------------------------------------------------------------------------------------------------------------------------------------------------------------------------------------------------------------------------------------------------------------------------------------------------------------------------------------------------------------------------------------------------------------------------------------------------------------------------------------------------------------------------------------------------------------------------------------------------------------------------------------------------------------------------------------------------------------------------------------------------------------------------------------------------------------------------------------------------------------------------------------------------------------------------------------------------------------------------------------------------------------------------------------------------------------------------------------------------------------------------------------------------------------------------------------------------------------------------------------------------------------------------------------------------------------------------------------------------------------------------------------------------------------------------------------------------------------------------------------------------------------------------------------------------------------------------------------------------------------------------------------------------------------------------------------------------------------------------------------------------------------------------------------------------------------------------------------------------------------------------------------------------------------------------------------------------------------------------------------------------------------------------------------------------------------------------------------------------------------------------------------------------------------------------------------------------------------------------------------------------------------------------------------------------------------------------------------------------------------------------------------------------------------------------------------------------------------------------------------------------------------------------------------------------------------------------------------------------------------------------------------------------------------------------------------------------------------------------------------------------------------------------------------------------------------------------------------------------------------------------------------------------------------------------------------------------------------------------------------------------------------------------------------------------------------------------------------------------------------------------------------------------------------------------------------------------------------------------------------------------------------------------------------------------------------------------------------------------------------------------------------------------------------------------------------------------------------------------------------------------------------------------------------------------------------------------------------------------------------------------------------------------------------------------------------------------------------------------------------------------------------------------------------------------------------------------------------------------------------------------------------------------------------------------------------------------------------------------------------------------------------------------------------------------------------------------------------------------------------------------------------------------------------------------------------------------------------------------------------------------------------------------------------------------------------------------------------------------------------------------------------------------------------------------------------------------------------------------------------------------------------------------------------------------------------------------------------------------------------------------------------------------|
| Medline In-process | <p>Reactions"/ OR (drug\$ adj3 side\$ adj3 effect\$).mp. OR (drug\$ adj3 toxic\$).mp. OR (drug\$ adj3 reaction\$ adj3 adverse\$).mp. OR (drug\$ adj3 event\$ adj3 adverse\$).mp. OR ae.fs. [adverse effects floating subheading] OR mo.fs. [mortality floating subheading] OR po.fs. [poisoning floating subheading] OR to.fs. [toxicity floating subheading] OR in.fs. [injuries floating subheading]</p> <p>[exp Burnout, Professional/ OR burnout.mp. OR (burnout adj3 effect\$).mp.] AND [exp Physicians/ OR exp Psychiatry/ OR allergist\$.mp. OR anesthesiologist\$.mp. OR cardiologist\$.mp. OR clinical pharmacologist\$.mp. OR clinical toxicologist\$.mp. OR dermatologist\$.mp. OR doctor\$.mp. OR endocrinologist\$.mp. OR gastroenterologist\$.mp. OR gynecologist\$.mp. OR hematologist\$.mp. OR immunologist\$.mp. OR medical biochemist\$.mp. OR medical geneticist\$.mp. OR medical microbiologist\$.mp. OR nephrologist\$.mp. OR neurologist\$.mp. OR neuropathologist\$.mp. OR neuroradiologist\$.mp. OR occupational physician\$.mp. OR oncologist\$.mp. OR ophthalmologist\$.mp. OR pathologist\$.mp. OR pediatrician\$.mp. OR physician\$.mp. OR psychiatrist\$.mp. OR radiologist\$.mp. OR rheumatologist\$.mp. OR surgeon\$.mp. OR urologist\$.mp.] AND [exp Diagnostic Errors/ OR exp Medical Errors/ OR exp Medication Errors/ OR exp "Quality of Health Care"/ OR exp Quality Assurance, Health Care/ OR misdiag\$.mp. OR (diagnos\$ adj3 error\$).mp. OR (medical\$ adj3 error\$).mp. OR (medication\$ adj3 error\$).mp. OR (drug\$ adj3 error\$).mp. OR (mistak\$ adj3 medic\$).mp. OR (surgic\$ adj3 error\$).mp. OR (quality\$ adj3 health\$ adj3 care\$).mp. OR (quality\$ adj3 healthcare\$).mp. OR (quality\$ adj3 of adj3 care\$).mp. OR exp Professional Competence/ OR (professional\$ adj3 competenc\$).mp. OR (technical\$ adj3 expertise\$).mp. OR (expertise\$ adj3 generaliz\$).mp. OR professionalism\$.mp. OR exp Treatment Outcome/ OR (treat\$ adj3 outcome\$).mp. OR (patient\$ adj3 outcome\$).mp. OR exp Professional Impairment/ OR (impair\$ adj3 physician\$).mp. OR (impair\$ adj3 doctor\$).mp. OR (disruptive\$ adj3 behav\$).mp. OR exp Safety/ OR safe\$.mp. OR exp Risk/ OR risk\$.mp. OR exp Patient Satisfaction/ OR (patient\$ adj3 satisf\$).mp. OR (client\$ adj3 satisf\$).mp. OR exp Professional-Patient Relations/ OR (professional\$ adj3 patient\$ adj3 relation\$).mp. OR (client\$ adj3 contact\$).mp. OR exp Physician-Patient Relations/ OR (physician\$ adj3 patient\$ adj3 relation\$).mp. OR (doctor\$ adj3 patient\$ adj3 relation\$).mp. OR exp Communication/ OR communicat\$.mp. OR misinform\$.mp. OR exp Health Communication/ OR exp "Attitude of Health Personnel"/ OR attitude\$.mp. OR exp Clinical Competence/ OR (clinical\$ adj3 competenc\$).mp. OR (clinical\$ adj3 skill\$).mp. OR exp Patient-Centered Care/ OR (patient\$ adj3 cent\$ adj3 care\$).mp. OR (patient\$ adj3 focus\$ adj3 care\$).mp. OR exp Empathy/ OR empath\$.mp. OR exp Patient Care/ OR (patient\$ adj3 care\$).mp. OR (informal\$ adj3 care\$).mp. OR exp "Standard of Care"/ OR (standard\$ adj3 care\$).mp. OR st.fs. [standards - floating subheading] OR exp Self Efficacy/ OR efficacy\$.mp. OR exp Clinical Audit/ OR audit\$.mp. OR exp Medical Audit/ OR (diagnos\$ adj3 mistak\$).mp. OR (medication\$ adj3 mistak\$).mp. OR (drug\$ adj3 mistak\$).mp. OR (surgic\$ adj3 mistak\$).mp. OR exp Safety Management/ OR (program\$ adj3 hazard\$ adj3 surveillance\$).mp. OR (management\$ adj3 safety\$).mp. OR (hazard\$ adj3 control\$).mp. OR (hazard\$ adj3 management\$).mp. OR exp Malpractice/ OR malpractic\$.mp. OR negligenc\$.mp. OR exp Morbidity/ OR morbidity\$.mp. OR exp Postoperative Complications/ OR (postoperative\$ adj3 complication\$).mp. OR exp Cross Infection/ OR (nosocomial\$ adj3 infection\$).mp. OR (hospital\$ adj3 infection\$).mp. OR (cross\$ adj3 infection\$).mp. OR exp Physician's Practice Patterns/ OR (practice\$ adj3 pattern\$ adj3 clinical\$).mp. OR (practice\$ adj3 pattern\$ adj3 physician\$).mp. OR (prescribing\$ adj3 pattern\$ adj3 physician\$).mp. OR (practice\$ adj3 pattern\$ adj3 professional\$).mp. OR (practice\$ adj3 pattern\$ adj3 variation\$).mp. OR (practice\$ adj3 clinical\$ adj3 variation\$).mp. OR (practice\$ adj3 medical\$ adj3 variation\$).mp. OR exp Mortality/ OR (rate\$ adj3 age-specific\$ adj3 death\$).mp. OR (rate\$ adj3 death\$).mp. OR (rate\$ adj3 fatalit\$).mp. OR mortalit\$.mp. OR exp "Outcome Assessment (Health Care)"/ OR (measure\$ adj3 outcome\$).mp. OR (assessment\$ adj3 outcome\$).mp. OR (research\$ adj3 outcome\$).mp. OR (stud\$ adj3 outcome\$).mp. OR (assessment\$ adj3 patient\$ adj3 outcome\$).mp. OR (research\$ adj3 patient\$ adj3 outcome\$).mp. OR exp Risk Reduction Behavior/ OR exp Risk-Taking/ OR exp "Root Cause Analysis"/ OR (cause\$ adj3 root\$ adj3 analys\$).mp. OR exp "Drug-Related Side Effects and Adverse Reactions"/ OR (drug\$ adj3 side\$ adj3 effect\$).mp. OR (drug\$ adj3 toxic\$).mp. OR (drug\$ adj3 reaction\$ adj3 adverse\$).mp. OR (drug\$ adj3 event\$ adj3 adverse\$).mp. OR ae.fs. [adverse effects floating subheading] OR mo.fs. [mortality floating subheading] OR po.fs. [poisoning floating subheading] OR to.fs. [toxicity floating subheading] OR in.fs. [injuries floating subheading]</p> |
| PsycINFO           | <p>[burnout.mp. OR (burnout adj3 effect\$).mp.] AND [exp physicians/ OR exp clinicians/ OR exp Psychiatry/ OR allergist\$.mp. OR anesthesiologist\$.mp. OR cardiologist\$.mp. OR clinical pharmacologist\$.mp. OR clinical toxicologist\$.mp. OR dermatologist\$.mp. OR doctor\$.mp. OR endocrinologist\$.mp. OR gastroenterologist\$.mp. OR gynecologist\$.mp. OR hematologist\$.mp. OR immunologist\$.mp. OR medical biochemist\$.mp. OR medical geneticist\$.mp. OR medical microbiologist\$.mp. OR nephrologist\$.mp. OR neurologist\$.mp. OR neuropathologist\$.mp. OR neuroradiologist\$.mp. OR occupational physician\$.mp. OR oncologist\$.mp. OR ophthalmologist\$.mp. OR pathologist\$.mp. OR pediatrician\$.mp. OR physician\$.mp. OR psychiatrist\$.mp. OR radiologist\$.mp. OR rheumatologist\$.mp. OR surgeon\$.mp. OR urologist\$.mp.] AND [exp Errors/ OR exp "Quality of Care"/ OR misdiag\$.mp. OR (diagnos\$ adj3 error\$).mp. OR (medical\$ adj3 error\$).mp. OR (medication\$ adj3 error\$).mp. OR (drug\$ adj3 error\$).mp. OR (mistak\$ adj3 medic\$).mp. OR (surgic\$ adj3 error\$).mp. OR (quality\$ adj3 health\$ adj3 care\$).mp. OR (quality\$ adj3 healthcare\$).mp. OR (quality\$ adj3 of adj3 care\$).mp. OR exp Professional Competence/ OR (professional\$ adj3 competenc\$).mp. OR (technical\$ adj3 expertise\$).mp. OR (expertise\$ adj3 generaliz\$).mp. OR professionalism\$.mp. OR exp Treatment Outcome/ OR (treat\$ adj3 outcome\$).mp. OR (patient\$ adj3 outcome\$).mp. OR exp Impaired Professionals/ OR (impair\$ adj3 physician\$).mp. OR (impair\$ adj3 doctor\$).mp. OR (disruptive\$ adj3 behav\$).mp. OR exp Safety/ OR safe\$.mp. OR exp Risk Factors/ OR exp Risk Management/ OR exp Risk Assessment/ OR risk\$.mp. OR exp Client Satisfaction/ OR (patient\$ adj3 satisf\$).mp. OR (client\$ adj3 satisf\$).mp. OR exp Therapeutic Processes/ OR (professional\$ adj3 patient\$ adj3 relation\$).mp. OR (client\$ adj3 contact\$).mp. OR (physician\$ adj3 patient\$ adj3 relation\$).mp. OR (doctor\$ adj3 patient\$ adj3 relation\$).mp. OR exp Communication/ OR communicat\$.mp. OR misinform\$.mp. OR exp Communication Skills/ OR exp Communication Barriers/ OR exp Health Personnel Attitudes/ OR attitude\$.mp. OR exp Competence/ OR (clinical\$ adj3 competenc\$).mp. OR (clinical\$ adj3 skill\$).mp. OR exp Client Centered Therapy/ OR (patient\$ adj3 cent\$ adj3 care\$).mp. OR (patient\$ adj3 focus\$ adj3 care\$).mp. OR exp Empathy/ OR empath\$.mp. OR exp Patients/ OR (patient\$ adj3 care\$).mp. OR (informal\$ adj3 care\$).mp. OR exp Professional</p>                                                                                                                                                                                                                                                                                                                                                                                                                                                                                                                                                                                                                                                                                                                                                                                                                                                                                                                                                                                                                                                                                                                                                                                                                                                                                                                                                                                                                                                                                                                                                                                                                                                                                                                                                                                                                                                                                                                                                                                                                                                                                                                                                                                                                                                                                                                                                                                                                                                                                                                                                                                                                                                                                                                                                                                                   |

| Database       | Search Terms                                                                                                                                                                                                                                                                                                                                                                                                                                                                                                                                                                                                                                                                                                                                                                                                                                                                                                                                                                                                                                                                                                                                                                                                                                                                                                                                                                                                                                                                                                                                                                                                                                                                                                                                                                                                                                                                                                                                                                                                                                                                                                                                                                                                                                                                                                                                                                                                                                                                                                                                                                                                                                                                                                                                                                                                                                                                                                                                                                                                                                                                                                                                                                                                                                                                                                                                                                                                                                                                                                                                                                                                                                                                                                                                                                                                                                                                                                                                                                                                                                                                                                                                                                                                                                                                                                                                                                                                                                                                                                                                                                                                                                                                                                                                                                                                                                                                                         |
|----------------|------------------------------------------------------------------------------------------------------------------------------------------------------------------------------------------------------------------------------------------------------------------------------------------------------------------------------------------------------------------------------------------------------------------------------------------------------------------------------------------------------------------------------------------------------------------------------------------------------------------------------------------------------------------------------------------------------------------------------------------------------------------------------------------------------------------------------------------------------------------------------------------------------------------------------------------------------------------------------------------------------------------------------------------------------------------------------------------------------------------------------------------------------------------------------------------------------------------------------------------------------------------------------------------------------------------------------------------------------------------------------------------------------------------------------------------------------------------------------------------------------------------------------------------------------------------------------------------------------------------------------------------------------------------------------------------------------------------------------------------------------------------------------------------------------------------------------------------------------------------------------------------------------------------------------------------------------------------------------------------------------------------------------------------------------------------------------------------------------------------------------------------------------------------------------------------------------------------------------------------------------------------------------------------------------------------------------------------------------------------------------------------------------------------------------------------------------------------------------------------------------------------------------------------------------------------------------------------------------------------------------------------------------------------------------------------------------------------------------------------------------------------------------------------------------------------------------------------------------------------------------------------------------------------------------------------------------------------------------------------------------------------------------------------------------------------------------------------------------------------------------------------------------------------------------------------------------------------------------------------------------------------------------------------------------------------------------------------------------------------------------------------------------------------------------------------------------------------------------------------------------------------------------------------------------------------------------------------------------------------------------------------------------------------------------------------------------------------------------------------------------------------------------------------------------------------------------------------------------------------------------------------------------------------------------------------------------------------------------------------------------------------------------------------------------------------------------------------------------------------------------------------------------------------------------------------------------------------------------------------------------------------------------------------------------------------------------------------------------------------------------------------------------------------------------------------------------------------------------------------------------------------------------------------------------------------------------------------------------------------------------------------------------------------------------------------------------------------------------------------------------------------------------------------------------------------------------------------------------------------------------------------------------|
|                | <p>Standards/ OR (standard\$ adj3 care\$).mp. OR exp Self Efficacy/ OR efficacy\$.mp. OR exp Clinical Audits/ OR audit\$.mp. OR (diagnos\$ adj3 mistak\$).mp. OR (medication\$ adj3 mistak\$).mp. OR (drug\$ adj3 mistak\$).mp. OR (surgic\$ adj3 mistak\$).mp. OR (program\$ adj3 hazard\$ adj3 surveillance\$).mp. OR (management\$ adj3 safety\$).mp. OR (hazard\$ adj3 control\$).mp. OR (hazard\$ adj3 management\$).mp. OR exp Professional Liability/ OR malpractic\$.mp. OR negligens\$.mp. OR exp Morbidity/ OR morbidit\$.mp. OR exp Postoperative Complications/ OR (postoperative\$ adj3 complication\$).mp. OR (nosocomial\$ adj3 infection\$).mp. OR (hospital\$ adj3 infection\$).mp. OR (cross\$ adj3 infection\$).mp. OR exp Clinical Practice/ OR (practice\$ adj3 pattern\$ adj3 clinical\$).mp. OR (practice\$ adj3 pattern\$ adj3 physician\$).mp. OR (prescribing\$ adj3 pattern\$ adj3 physician\$).mp. OR (practice\$ adj3 pattern\$ adj3 professional\$).mp. OR (practice\$ adj3 pattern\$ adj3 variation\$).mp. OR (practice\$ adj3 clinical\$ adj3 variation\$).mp. OR (practice\$ adj3 medical\$ adj3 variation\$).mp. OR exp Mortality Rate/ OR exp "Death and Dying"/ OR (rate\$ adj3 age-specific\$ adj3 death\$).mp. OR (rate\$ adj3 death\$).mp. OR (rate\$ adj3 fatalit\$).mp. OR mortalit\$.mp. OR exp Treatment Effectiveness Evaluation/ OR (measure\$ adj3 outcome\$).mp. OR (assessment\$ adj3 outcome\$).mp. OR (research\$ adj3 outcome\$).mp. OR (stud\$ adj3 outcome\$).mp. OR (assessment\$ adj3 patient\$ adj3 outcome\$).mp. OR (research\$ adj3 patient\$ adj3 outcome\$).mp. OR exp Risk-Taking/ OR exp Error Analysis/ OR (cause\$ adj3 root\$ adj3 analys\$).mp. OR exp "Side Effects (Drug)"/ OR (drug\$ adj3 side\$ adj3 effect\$).mp. OR (drug\$ adj3 toxic\$).mp. OR (drug\$ adj3 reaction\$ adj3 adverse\$).mp. OR (drug\$ adj3 event\$ adj3 adverse\$).mp. OR exp Toxic Disorders/ OR exp Injuries/ OR 3620.cc. [Personnel Management &amp; Selection &amp; Training classification code] OR 3630.cc. [Personnel Evaluation &amp; Job Performance classification code] OR 3650.cc. [Personnel Attitudes &amp; Job Satisfaction classification code] OR 3670.cc. [Working Conditions &amp; Industrial Safety classification code] OR 3430.cc. [Professional Personnel Attitudes &amp; Characteristics classification code] OR 3450.cc. [Professional Ethics &amp; Standards &amp; Liability code] OR 3470.cc. [Impaired Professionals classification code]</p>                                                                                                                                                                                                                                                                                                                                                                                                                                                                                                                                                                                                                                                                                                                                                                                                                                                                                                                                                                                                                                                                                                                                                                                                                                                                                                                                                                                                                                                                                                                                                                                                                                                                                                                                                                                                                                                                                                                                                                                                                                                                                                                                                                                                                                                                                                                                                                                |
| Embase         | <p>[exp Burnout/ OR burnout.mp. OR (burnout adj3 effect\$).mp.] AND [exp Physicians/ OR exp Psychiatry/ OR allergist\$.mp. OR anesthesiologist\$.mp. OR cardiologist\$.mp. OR clinical pharmacologist\$.mp. OR clinical toxicologist\$.mp. OR dermatologist\$.mp. OR doctor\$.mp. OR endocrinologist\$.mp. OR gastroenterologist\$.mp. OR gynecologist\$.mp. OR hematologist\$.mp. OR immunologist\$.mp. OR medical biochemist\$.mp. OR medical geneticist\$.mp. OR medical microbiologist\$.mp. OR nephrologist\$.mp. OR neurologist\$.mp. OR neuropathologist\$.mp. OR neuroradiologist\$.mp. OR occupational physician\$.mp. OR oncologist\$.mp. OR ophthalmologist\$.mp. OR pathologist\$.mp. OR pediatrician\$.mp. OR physician\$.mp. OR psychiatrist\$.mp. OR radiologist\$.mp. OR rheumatologist\$.mp. OR surgeon\$.mp. OR urologist\$.mp.] AND [exp Diagnostic Errors/ OR exp Medical Errors/ OR exp Medication Errors/ OR exp Health care quality/ OR exp Quality control/ OR misdiag\$.mp. OR (diagnos\$ adj3 error\$).mp. OR (medical\$ adj3 error\$).mp. OR (medication\$ adj3 error\$).mp. OR (drug\$ adj3 error\$).mp. OR (mistak\$ adj3 medic\$).mp. OR (surgic\$ adj3 error\$).mp. OR (quality\$ adj3 health\$ adj3 care\$).mp. OR (quality\$ adj3 healthcare\$).mp. OR (quality\$ adj3 of adj3 care\$).mp. OR exp Professional Competence/ OR (professional\$ adj3 competenc\$).mp. OR (technical\$ adj3 expertise\$).mp. OR (expertise\$ adj3 generaliz\$).mp. OR professionalism\$.mp. OR exp Treatment Outcome/ OR (treat\$ adj3 outcome\$).mp. OR (patient\$ adj3 outcome\$).mp. OR exp Malpractice/ OR (impair\$ adj3 physician\$).mp. OR (impair\$ adj3 doctor\$).mp. OR (disruptive\$ adj3 behav\$).mp. OR exp Safety/ OR safe\$.mp. OR exp Risk OR exp Risk Factors/ OR exp Risk Assessment/ OR exp Risk Management/ OR risk\$.mp. OR exp patient satisfaction/ OR (patient\$ adj3 satisf\$).mp. OR (client\$ adj3 satisf\$).mp. OR exp human relation/ OR (professional\$ adj3 patient\$ adj3 relation\$).mp. OR (client\$ adj3 contact\$).mp. OR exp doctor patient relation/ OR (physician\$ adj3 patient\$ adj3 relation\$).mp. OR (doctor\$ adj3 patient\$ adj3 relation\$).mp. OR exp interpersonal communication/ OR communicat\$.mp. OR misinform\$.mp. OR exp communication disorder/ OR exp communication skill/ OR exp health personnel attitude/ OR attitude\$.mp. OR exp clinical competence/ OR (clinical\$ adj3 competenc\$).mp. OR (clinical\$ adj3 skill\$).mp. OR exp patient care/ OR (patient\$ adj3 cent\$ adj3 care\$).mp. OR (patient\$ adj3 focus\$ adj3 care\$).mp. OR exp Empathy/ OR empath\$.mp. OR exp medical care/ OR (patient\$ adj3 care\$).mp. OR (informal\$ adj3 care\$).mp. OR exp professional standard/ OR (standard\$ adj3 care\$).mp. OR exp standard/ OR exp Self Efficacy/ OR efficacy\$.mp. OR exp medical audit/ OR audit\$.mp. OR (diagnos\$ adj3 mistak\$).mp. OR (medication\$ adj3 mistak\$).mp. OR (drug\$ adj3 mistak\$).mp. OR (surgic\$ adj3 mistak\$).mp. OR (program\$ adj3 hazard\$ adj3 surveillance\$).mp. OR (management\$ adj3 safety\$).mp. OR (hazard\$ adj3 control\$).mp. OR (hazard\$ adj3 management\$).mp. OR malpractic\$.mp. OR negligens\$.mp. OR exp Morbidity/ OR morbidit\$.mp. OR exp postoperative complication/ OR (postoperative\$ adj3 complication\$).mp. OR exp Cross Infection/ OR (nosocomial\$ adj3 infection\$).mp. OR (hospital\$ adj3 infection\$).mp. OR (cross\$ adj3 infection\$).mp. OR exp clinical practice/ OR exp professional practice/ OR (practice\$ adj3 pattern\$ adj3 clinical\$).mp. OR (practice\$ adj3 pattern\$ adj3 physician\$).mp. OR (prescribing\$ adj3 pattern\$ adj3 physician\$).mp. OR (practice\$ adj3 pattern\$ adj3 professional\$).mp. OR (practice\$ adj3 pattern\$ adj3 variation\$).mp. OR (practice\$ adj3 clinical\$ adj3 variation\$).mp. OR (practice\$ adj3 medical\$ adj3 variation\$).mp. OR exp mortality/ OR exp death/ OR (rate\$ adj3 age-specific\$ adj3 death\$).mp. OR (rate\$ adj3 death\$).mp. OR (rate\$ adj3 fatalit\$).mp. OR mortalit\$.mp. OR exp outcome assessment/ OR (measure\$ adj3 outcome\$).mp. OR (assessment\$ adj3 outcome\$).mp. OR (research\$ adj3 outcome\$).mp. OR (stud\$ adj3 outcome\$).mp. OR (assessment\$ adj3 patient\$ adj3 outcome\$).mp. OR (research\$ adj3 patient\$ adj3 outcome\$).mp. OR exp risk reduction/ OR exp high risk behavior/ OR exp "root cause analysis"/ OR (cause\$ adj3 root\$ adj3 analys\$).mp. OR exp adverse drug reaction/ OR (drug\$ adj3 side\$ adj3 effect\$).mp. OR (drug\$ adj3 toxic\$).mp. OR (drug\$ adj3 reaction\$ adj3 adverse\$).mp. OR (drug\$ adj3 event\$ adj3 adverse\$).mp. OR ae.fs. [adverse drug reaction] OR to.fs. [drug toxicity] OR dt.fs. [drug interaction subheading] OR si.fs. [side effect subheading] OR co.fs. [complication subheading]</p> |
| Web of Science | <p>[burn out* OR burnout*] AND [physician* OR clinician* OR psychiatry* OR allergist* OR anesthesiologist* OR cardiologist* OR clinical pharmacologist* OR clinical toxicologist* OR dermatologist* OR doctor* OR endocrinologist* OR gastroenterologist* OR gynecologist* OR hematologist* OR immunologist* OR medical biochemist* OR medical geneticist* OR medical microbiologist* OR nephrologist* OR neurologist* OR neuropathologist* OR neuroradiologist* OR occupational physician* OR oncologist* OR</p>                                                                                                                                                                                                                                                                                                                                                                                                                                                                                                                                                                                                                                                                                                                                                                                                                                                                                                                                                                                                                                                                                                                                                                                                                                                                                                                                                                                                                                                                                                                                                                                                                                                                                                                                                                                                                                                                                                                                                                                                                                                                                                                                                                                                                                                                                                                                                                                                                                                                                                                                                                                                                                                                                                                                                                                                                                                                                                                                                                                                                                                                                                                                                                                                                                                                                                                                                                                                                                                                                                                                                                                                                                                                                                                                                                                                                                                                                                                                                                                                                                                                                                                                                                                                                                                                                                                                                                                    |

| Database | Search Terms                                                                                                                                                                                                                                                                                                                                                                                                                                                                                                                                                                                                                                                                                 |
|----------|----------------------------------------------------------------------------------------------------------------------------------------------------------------------------------------------------------------------------------------------------------------------------------------------------------------------------------------------------------------------------------------------------------------------------------------------------------------------------------------------------------------------------------------------------------------------------------------------------------------------------------------------------------------------------------------------|
|          | ophthalmologist* OR pathologist* OR pediatrician* OR physician* OR psychiatrist* OR radiologist* OR rheumatologist* OR surgeon* OR urologist* OR consultant*] AND [error* OR health* care*OR healthcare* OR quality* OR misdiag* OR mistak* OR competenc* OR expertis* OR professionalism* OR outcome* OR impair* OR disruptive* OR safe* OR risk* OR satisf* OR relation* OR contact* OR communicat* OR misinform* OR attitude* OR skill* OR care* OR empath* OR standard* OR audit* OR hazard* OR malpractic* OR negligenc* OR morbidit* OR infection* OR practice* pattern* OR prescrib* pattern* OR mortalit* OR death* OR fatalit* OR drug* OR adverse* OR poison* OR toxic* OR injur*] |

## Screening process

Relevant articles were identified using a multi-phase screening process using the inclusion and exclusion criteria for this review. In the first step, titles were screened. Next, abstracts of the articles that remained after the first step were screened. The final step of the process involved screening the full text of all articles that passed the first and second phases. In the full text screening, papers for which there was insufficient information in the title and abstract to determine relevancy were also included. Two reviewers (CSD and LT) independently completed the multi-phase screening process. The inter-rater reliability corrected for chance<sup>24</sup> between CSD and LT was  $\kappa = 0.96$ . Before moving onto each stage, disagreements were discussed until consensus was reached.

For this review, burnout was defined as a syndrome of emotional exhaustion, cynicism (depersonalization) and reduced feelings of personal accomplishment related to work.<sup>6</sup> Quality of care related to acceptability was identified with measures reflecting physician-patient interactions such as patient satisfaction, perceived quality of care, physician communication with patients, and physician attitudes towards patients. In addition, safety was identified by measures of medical errors.

Study inclusion criteria were:

1. Studies reported quality of care outcomes related to acceptability and/or safety
2. The sample population was comprised of practicing physicians regardless of specialty who worked in civilian settings
3. Burnout was assessed based on a psychometrically validated measure



4. Paper reports original research

Exclusion criteria were:

1. The study sample was comprised only of residents and medical students
2. The study did not examine the relationship between burnout and one of the two quality of care dimensions
3. Burnout was not assessed based on a validated measure
4. The paper was a review article or commentary

### **Risk of Bias Assessment**

All included articles were assessed for risk of bias by both reviewers (CSD and LT).

Disagreements between the two reviewers were discussed until consensus was reached.

To assess the risk of bias in observational studies, Sanderson et al.<sup>25</sup> recommend the use of a transparent checklist that concentrates on the “few, principal, and potential sources of bias in a study’s findings”. They assert that the fundamental domains should include: (1) the appropriate selection of participants, (2) appropriate measurement of variables, and (3) appropriate control of confounding. In accordance with their recommendations and the Strengthening of Observational Studies in Epidemiology (STROBE) criteria,<sup>26</sup> a 9-item quality checklist with the following criteria adapted from Lagerveld et al.<sup>27</sup> was used:

1. Study population is well described to facilitate understanding about the generalizability of the results based on the study sample (e.g., age, sex, location of the study, physician specialty, practice location)
2. Data collection methods that address the risk of bias are described
3. Participation/response rate was at least 50% on average
4. Quality of care outcome was clearly defined
5. Statistical method was appropriate for the question being answered
6. Statistical significance of associations were tested and reported
7. Study controlled for at least one confounder such as sex or age was considered in the analyses

8. Physician matched with patient
9. Longitudinal data was used

Each item was scored “1” if the criterion had been met. Each article could achieve a minimum score of 8. Based on their total score, articles were categorized either as high (9-8 points), moderate (7-5 points), or low quality (1-4 points).

## RESULTS

### Article Inclusion and Exclusion Results

The electronic literature search resulted in the identification of 3,255 unique citations (Figure 1). Based on the title review, 3,168 citations were excluded; this left 87 articles for abstract review. During the abstract review, another 26 citations were excluded; this left 61 articles for full-text review. Reasons for article exclusions at full text review were: (1) not a relevant outcome (n = 10), (2) sample not comprised of physicians/cannot distinguish physicians as a group from other clinicians (n = 14), (3) it was not original research (n = 19), (4) burnout not measured with a validated instrument (n = 1), and (5) not published in a peer-reviewed journal (n = 7). After the full-text review, 10 articles remained and their reference lists were hand searched for relevant studies. The hand search identified six additional citations; all six were excluded at full text review.

-----  
Insert Figure 1  
-----

### Risk of Bias Assessment Results

Our assessment indicated 9 of the 10 studies were of moderate risk of bias; one was of low risk of bias. Figure 2 illustrates the limitations of these studies. Only one study comprehensively<sup>5</sup> described the study population from which the study sample was drawn. Only

one study used longitudinal data.<sup>28</sup> Other limitations involved not reporting the response rate<sup>29-32</sup> and not controlling for possible confounding factors in the statistical analyses.<sup>32,33</sup> All included studies clearly defined the quality of care measure used, employed appropriate statistical tests, and reported the results of the statistical testing. (Supplementary File 1: Risk of Bias Assessment Checklist)

-----  
 Insert Figure 2  
 -----

### Overview of the Studies

Of the 10 studies that met the inclusion criteria (Table 2), three were conducted in the US, two in Germany, one each in Greece, Israel, Japan, and Taiwan. There was one multi-national study based on data from Italy, Spain, and Portugal.

**Table 2. Description of the Studies**

| Author(s)                                                 | Study Population                                                                                                                                                                                                                                                          | Description of Sample                                                                                                                                                                                                                                                                     | Burnout Measure                   | Quality of Care Measure                                                                                                                                                                                                                                                                                                                                                                                 |
|-----------------------------------------------------------|---------------------------------------------------------------------------------------------------------------------------------------------------------------------------------------------------------------------------------------------------------------------------|-------------------------------------------------------------------------------------------------------------------------------------------------------------------------------------------------------------------------------------------------------------------------------------------|-----------------------------------|---------------------------------------------------------------------------------------------------------------------------------------------------------------------------------------------------------------------------------------------------------------------------------------------------------------------------------------------------------------------------------------------------------|
| Agagnostopoulos et al. (2012) <sup>29</sup><br><br>Greece | Physicians working in three large primary health care centers.<br><br>Patients of participating physicians. Patients selected through systematic random sampling – 1:3 consecutive patients.<br><br>Physician response rate: 85.8%<br>Patient response rate: Not reported | n = 30 physicians<br><br>≤ 10 years practicing: 53%<br><br>Specialties:<br>General practitioners: 63%<br>Pathologists/internists: 23.3%<br><br>Male: n=17<br>Female: n=13<br>> 50 yrs: 43%<br>26-50 yrs: 40%<br><br>n = 300 patients<br>Male: 46%<br>Female: 54%<br>Mean age: 54 ± 15 yrs | 22-item Maslach Burnout Inventory | Patient report:<br>Patient satisfaction assessed using 18-item Consultation Satisfaction Questionnaire. <sup>34</sup><br>5-point Likert scale from 1 = "strongly agree" to 5 = "strongly disagree".<br>Satisfaction sub-scales: (1) General, (2) Perceived length of consultation, (3) Depth of relationship, (4) Professional care provided<br>Overall satisfaction: sum of all items (max score = 90) |

| Author(s)                                                     | Study Population                                                                                                                                                                                                                                                                                               | Description of Sample                                                                                                                                                                                                                                    | Burnout Measure                                                                                                                                                                                                   | Quality of Care Measure                                                                                                                                                                                                                                                                                                                                                                                                                                                      |
|---------------------------------------------------------------|----------------------------------------------------------------------------------------------------------------------------------------------------------------------------------------------------------------------------------------------------------------------------------------------------------------|----------------------------------------------------------------------------------------------------------------------------------------------------------------------------------------------------------------------------------------------------------|-------------------------------------------------------------------------------------------------------------------------------------------------------------------------------------------------------------------|------------------------------------------------------------------------------------------------------------------------------------------------------------------------------------------------------------------------------------------------------------------------------------------------------------------------------------------------------------------------------------------------------------------------------------------------------------------------------|
| <p>Halbesleben and Rathert (2008)<sup>30</sup></p> <p>USA</p> | <p>Attending physicians of university students who had been hospitalized in past year.</p> <p>Student response rate: Not reported</p>                                                                                                                                                                          | <p>n = 178 physicians</p> <p>Yrs practicing: Not reported</p> <p>Specialties: Not reported</p> <p>Male: n = 84<br/>Female: n = 94<br/>Mean age = 46 ± 13 yrs</p> <p>n = 178 patients</p> <p>Male: n = 98<br/>Female: n = 80<br/>Mean age: 23 ± 5 yrs</p> | <p>22-item Maslach Burnout Inventory modified to apply to patients rather than general care recipients</p>                                                                                                        | <p>Patient report: Patient satisfaction assessed using 22-item SERVQUAL.<sup>35</sup> 7-point Likert scale from 1 = "strongly disagree" to 7 = "strong agree".</p>                                                                                                                                                                                                                                                                                                           |
| <p>Hayashino et al. (2012)<sup>28</sup></p> <p>Japan</p>      | <p>Members of a panel of 6,459 hospital-based physicians recruited through hospital lists and scientific meetings. A randomly selected sub-sample of 1,198 were invited to participate.</p> <p>Response rate: 70%</p>                                                                                          | <p>n = 836 physicians</p> <p>Yrs practicing: Not reported</p> <p>Male: 92%<br/>Female: 8%</p> <p>28-39 yrs: 23%<br/>40-49 yrs: 47%<br/>50-59 yrs: 26%<br/>60-81 yrs: 4%</p>                                                                              | <p>17-item Maslach Burnout Inventory developed for Japanese healthcare professionals</p> <p>Used burnout thresholds:<br/>EE: ≥ 21<br/>DP: ≥ 18<br/>PA: ≥ 16</p>                                                   | <p>Physician report: Perceived medical errors assessed with questions: "Are you concerned that you have made any major medical mistakes in the last year?" IF "yes", asked about number of medical errors that concerned respondent.</p>                                                                                                                                                                                                                                     |
| <p>Klein et al. (2010)<sup>5</sup></p> <p>Germany</p>         | <p>Physicians in surgery working in &gt; 100 beds general hospitals with a general surgical and/or gynecological ward.</p> <p>Stratified probability sample based on hospital beds.</p> <p>Response rates:<br/>Hospital level: 53%<br/>Physician level: 36%<br/>Physicians in participating hospitals: 65%</p> | <p>n = 1,311 physicians</p> <p>Mean yrs practicing: 11yrs</p> <p>Male: 60%<br/>Female: 40%</p> <p>Mean age = 45 ± 8.5 yrs</p>                                                                                                                            | <p>Copenhagen Burnout Inventory (CBI). Three scales assessing personal, client, and work burnout. This study focused on personal burnout (i.e., degree of physical and psychological fatigue and exhaustion).</p> | <p>Physician report: Perceived quality of care assessed using short version of Chirurgisches Qualitätssiegel. Created three sub-scales: (1) psychosocial care, (2) diagnosis/therapy, (3) quality assurance. 5-point Likert scale from 1 = "very good" to 5 = "bad".</p> <p>Two questions about frequency of diagnostic and therapeutic errors: "I have made mistakes in diagnosis." and "I have made mistakes in treatment." 4-point Likert scale ("never" to "often").</p> |



| Author(s)                                                 | Study Population                                                                                                                                                                                                                                                         | Description of Sample                                                                                                                                                                                                                                                                                                                                                         | Burnout Measure                                                                                                                                                                                                                                                                      | Quality of Care Measure                                                                                                                                                                                                                                                                                                                                                                                                                    |
|-----------------------------------------------------------|--------------------------------------------------------------------------------------------------------------------------------------------------------------------------------------------------------------------------------------------------------------------------|-------------------------------------------------------------------------------------------------------------------------------------------------------------------------------------------------------------------------------------------------------------------------------------------------------------------------------------------------------------------------------|--------------------------------------------------------------------------------------------------------------------------------------------------------------------------------------------------------------------------------------------------------------------------------------|--------------------------------------------------------------------------------------------------------------------------------------------------------------------------------------------------------------------------------------------------------------------------------------------------------------------------------------------------------------------------------------------------------------------------------------------|
| <p>Ratanawongsa et al. (2008)<sup>31</sup></p> <p>USA</p> | <p>Physicians from 15 urban community-based clinics who provided primary care to adult patient enrolled in a randomized controlled trial for hypertensive minority patient.</p> <p>Response rate: Not reported</p>                                                       | <p>n = 40 physicians</p> <p>Mean years of practice: 11 ± 7.7 yrs</p> <p>Male: 47%<br/>Female: 53%</p> <p>Mean age: 42 ± 8.7 yrs</p> <p>Specialities:<br/>Internal Medicine: 83%<br/>Family Practice: 15%<br/>General Practice: 2%</p> <p>n = 235 patients</p> <p>Male: 34%<br/>Female: 66%<br/>Mean age: 59 ± 13.2 yrs</p>                                                    | <p>A 6-item scale derived from the Maslach Burnout Inventory that captures the domain of EE and PA. Five point Likert scale from 1 = "strongly agree" to 3 = "neutral" to 5 = "strongly agree".</p> <p>Based on terciles, burnout scores were categorized as low, average, high.</p> | <p>Physician report: Physicians completed "brief questionnaires indicating the degree to which they knew the patient, their attitudes toward the patient in general, and their attitudes regarding the visit".</p> <p>Audiotaped encounters analyzed for rapport-building communication behaviors using the Roter Interaction Analysis System. Four types of rapport identified: (1) Positive, (2) Negative, (3) Emotional, (4) Social</p> |
| <p>Shanafelt et al. (2010)<sup>36</sup></p> <p>USA</p>    | <p>American surgeons who were members of the American College of Surgeons who permitted email correspondence.</p> <p>Response rate: 32%</p>                                                                                                                              | <p>n = 7,905 physicians</p> <p>Specialty:<br/>General: 41%<br/>Cardiothoracic: 6%<br/>Colorectal: 4%<br/>Otolaryngology: 5%<br/>Obstetrics/gynecology: 1%<br/>Oncologic: 5%<br/>Pediatric: 2%<br/>Plastic: 4%<br/>Transplant: 2%<br/>Trauma: 4%<br/>Urologic: 4%<br/>Vascular: 6%<br/>Other: 6%</p> <p>Male: 87%<br/>Female: 13%</p> <p>Median age (IQR): 51 yrs (43, 59)</p> | <p>22-item Maslach Burnout Inventory</p>                                                                                                                                                                                                                                             | <p>Physician response to: "Are you concerned you have made any major medical error in the last 3 months?"</p>                                                                                                                                                                                                                                                                                                                              |
| <p>Shirom et al. (2006)<sup>37</sup></p> <p>Israel</p>    | <p>Physicians from 4 health plans specializing in either: ophthalmology, dermatology, otolaryngology, gynecology (community-based), general surgery, cardiology (hospital-based). 50% random probability sample drawn from each specialty.</p> <p>Response rate: 63%</p> | <p>n = 890 physicians</p> <p>Male: 80%<br/>Female: 20%</p> <p>Median age: 52 yrs</p>                                                                                                                                                                                                                                                                                          | <p>12-items from the Shirom-Melamed Burnout Measure with 3 sub-scales: (1) physical fatigue, (2) cognitive weariness, (3) emotional exhaustion</p>                                                                                                                                   | <p>Physicians completed a 15-item version of the SERVQUAL patient satisfaction scale. 5-point Likert scale from 1 = "to a very small extent" to 5 = "to a very large extent".</p>                                                                                                                                                                                                                                                          |

| Author(s)                                                     | Study Population                                                                                                                                                                             | Description of Sample                                                                                                                      | Burnout Measure                                                                                                                                                   | Quality of Care Measure                                                                                                                                                                                                                                                                                                                                 |
|---------------------------------------------------------------|----------------------------------------------------------------------------------------------------------------------------------------------------------------------------------------------|--------------------------------------------------------------------------------------------------------------------------------------------|-------------------------------------------------------------------------------------------------------------------------------------------------------------------|---------------------------------------------------------------------------------------------------------------------------------------------------------------------------------------------------------------------------------------------------------------------------------------------------------------------------------------------------------|
| Travado et al. (2005) <sup>32</sup><br>Italy, Spain, Portugal | Physicians recruited from cancer centers of three hospitals – two general hospitals with a cancer ward and one cancer hospital.<br><br>Convenience sample<br><br>Response rate: Not reported | n = 125 physicians<br><br>Yrs of practice: 15 ± 9.4 yrs<br><br>Male: 47%<br>Female: 54%<br><br>Mean age: 42 ± 9.7 yrs                      | 22-item Maslach Burnout Inventory<br><br>Used Maslach and Jackson (1986) cutoff scores for no/low burnout, intermediate, and high burnout                         | Communication skills assessed using two scales: (1) Self-Confidence in Communications Skills (SCSS). 12-item scale rating ability to communicate and manage a series of clinical situations. (2) Expected Outcomes of Communication (EOC). 23-item scale assessing extent to which physician perceives result of communication is positive or negative. |
| Weigl et al. (2015) <sup>38</sup><br>Germany                  | Physicians working in one academic children's hospital who were providing patient care.<br><br>Response rate: 74%                                                                            | n = 88 physicians<br><br>Yrs of practice: 8 ± 6.7 yrs<br><br>Male: 47%<br>Female: 53%<br><br>Mean age: 37 ± 8.6 yrs                        | Two sub-scales of the Maslach Burnout Inventory: Emotional Exhaustion and Depersonalization.<br><br>High burnout defined as Mean EE score > 3.5 and Mean DP > 2.5 | 2-item perceived quality of care measure: "My workload frequently leads to reduced quality of work" and "Adverse work conditions frequently lead to a loss of quality." 5-point Likert scale from 1 = "not at all" to 5 = "a very great extent".                                                                                                        |
| Weng et al. (2011) <sup>33</sup><br>Taiwan                    | Physicians working in two hospitals.<br><br>Patients of participating physicians.<br><br>Physician response rate: Not reported<br><br>Patient response rate: 78%                             | n = 110 internists<br><br>Male: 85%<br>Female: 15%<br><br>Mean age: 41 ± 6.9 yrs<br><br>n = 2,872 patients<br><br>Male: 59%<br>Female: 41% | Maslach Burnout Inventory                                                                                                                                         | Patient satisfaction assessed with two questions: "I am satisfied with the care provided by my doctor" and "I would recommend this doctor to my friends and family members".                                                                                                                                                                            |

### Description of the Study Populations

Five of the studies focused on hospital-based physicians.<sup>5,28,32,33,38</sup> Among these studies, two focused on cancer<sup>32</sup> and children's<sup>38</sup> specialty hospitals. In addition, one of these studies recruited surgeons practicing either in general surgery or gynecological wards.<sup>5</sup>

The remaining five studies recruited physicians practicing in a variety of settings. Two studies sought physicians in primary health care centers;<sup>29,31</sup> they included physicians practicing in internal medicine, general practice, and family practice. Two studies did not specify the setting.<sup>30,36</sup> However, of these two, one focused on surgeons.<sup>36</sup> Finally, one study used four

1  
2  
3 health plans to recruit and contained a mixture of community and hospital physicians<sup>37</sup> which  
4 included physicians specializing in ophthalmology, dermatology, otolaryngology, community-  
5 based gynecology, general surgery, and hospital-based cardiology.  
6  
7

## 8 9 10 Measuring Burnout

11  
12 In eight of the 10 studies, burnout was measured using the 22-item Maslach Burnout  
13 Inventory (MBI)<sup>6</sup> or selected MBI sub-scales.<sup>27-33,36,38</sup> The complete 22-item MBI measures  
14 three dimensions of burnout: Emotional Exhaustion, Depersonalization and Personal  
15 Accomplishment. It is one of the most widely used measures of burnout in the scientific  
16 literature.<sup>39,40</sup>  
17  
18

19  
20 The two remaining studies used the Copenhagen Burnout Inventory (CBI)<sup>39</sup> and the  
21 Shirom-Melamed Burnout Measure (SMBM).<sup>40,41</sup> The CBI is a 19-item scale comprised of three  
22 sub-scales that assess personal burnout, work-related burnout, and client-related burnout.<sup>39</sup> It has  
23 been shown to be correlated with mental and general health as well as job satisfaction.<sup>39</sup> The  
24 SMBM is a 22-item measure with three sub-scales that assess physical fatigue, emotional  
25 exhaustion, and cognitive weariness.<sup>40</sup> The psychometric properties of these scales continue to  
26 be explored.<sup>40,42,43</sup>  
27  
28  
29  
30  
31  
32  
33  
34  
35  
36  
37  
38

## 39 40 Measuring Quality of Care related to Acceptability and Patient Safety

41  
42 Four types of quality of care measures related to acceptability and safety were used in  
43 these studies. In terms of patient safety, medical errors were measured. Acceptability related  
44 measures included patient satisfaction, perceived general quality of care, and physician  
45 communication/attitudes.  
46  
47  
48  
49  
50  
51  
52  
53  
54  
55  
56  
57  
58  
59  
60

### *Patient Safety Measures: Medical errors*

Patient safety was examined with medical errors. This outcome was assessed in three studies.<sup>5,28,36</sup> Hayashino et al.<sup>28</sup> and Shanafelt et al.<sup>36</sup> used similar questions about whether the respondent made major medical errors. However, the studies differed in the time frame that the respondent was asked to consider. Hayashino et al.<sup>28</sup> asked about the past year while Shanafelt et al.<sup>36</sup> inquired about the past three months. In contrast to these studies, Klein et al.<sup>5</sup> asked about frequency of diagnostic mistakes and treatment without specifying a time frame. The first two studies seem to emphasize *major* errors rather than *any* errors. In addition to questions about frequency of diagnostic mistakes and treatment, Klein et al.<sup>5</sup> included a questionnaire based on the Canadian Physician Achievement Review to evaluate physician self-perceived quality of psychosocial care, diagnosis/therapy, and quality assurance.<sup>44</sup>

### *Acceptability Measures: Patient satisfaction/Perceived Quality of Care*

With regard to acceptability measures, patient satisfaction was assessed in four studies.<sup>29,30,33,37</sup> In two of these studies, the SERVQUAL was used to measure patient satisfaction/quality of care.<sup>30,37</sup> The SERVQUAL was developed to measure service quality along five dimensions: (1) tangibles (i.e., physical facilities), (2) Reliability (i.e., performs dependably and accurately), (3) responsiveness (i.e., willingness to help), (4) assurance (i.e., ability to inspire trust), and (5) empathy (i.e., caring).<sup>45</sup> Halbesleben and Rathert<sup>30</sup> used a healthcare specific version of the SERVQUAL. Shirom and colleagues<sup>37</sup> adapted the SERVQUAL by dropping 7 items and revising the language for physicians to rate their own quality of care using the remaining 15 items.

Weigl et al.<sup>38</sup> looked at physician-perceived quality of care by asking physicians to rate two statements on a 5-point scale, “My workload frequently leads to reduced quality of work,”

1  
2  
3 and “Adverse work conditions frequently lead to a loss of quality.”  
4

5 One study<sup>29</sup> used the Consultation Satisfaction Questionnaire (CSQ) scale that was  
6 created to assess patient satisfaction with general practitioners.<sup>34</sup> It is comprised of 18 items and  
7  
8 measures satisfaction along four dimensions: general satisfaction, professional care, depth of  
9  
10 relationship, and perceived time.  
11  
12

13  
14 Finally, in their study, Weng et al.<sup>33</sup> used two questions to indicate patient satisfaction, “I  
15 am satisfied with the care provided by my doctor,” and “I would recommend this doctor to my  
16  
17 friends and family.” The first of Weng et al.’s<sup>33</sup> question is similar to one of the CSQ’s<sup>34</sup> general  
18  
19 satisfaction items, “I am totally satisfied with my visit to the doctor.” A version of the second  
20  
21 question has been used to measure satisfaction and was correlated with the EUROPEP patient  
22  
23 satisfaction questionnaire.<sup>46</sup>  
24  
25

#### 26 27 28 *Acceptability Measures: Communication/Attitudes* 29

30  
31 Two studies focused on physician communication/attitudes.<sup>31,32</sup> Using audiotapes of  
32  
33 physician/patient interactions, Ratanawongsa et al.<sup>31</sup> assessed the interactions by employing the  
34  
35 Roter Interaction Analysis System (RIAS).<sup>47</sup> RIAS is a validated method of categorizing these  
36  
37 interactions into three categories related either to content, affection, or process.<sup>48</sup> There is  
38  
39 evidence that there is an association between the content and the socioemotional nature of the  
40  
41 interactions as categorized using the RIAS and patient satisfaction.<sup>47,48</sup>  
42  
43

44  
45 Travado et al.<sup>32</sup> examined the association between burnout and communication using two  
46  
47 measures: the Self-Confidence in Communications Skills (SCSS) and the Expected Outcomes of  
48  
49 Communication (EOC).<sup>49</sup> In their article, Parle and colleagues<sup>49</sup> note that exploration of the  
50  
51 psychometric properties of both measures were being conducted. Both were developed to  
52  
53 understand the communication skills of physicians working with cancer patients.  
54  
55  
56  
57  
58  
59

### Study Outcomes: Burnout and Quality of Care

In this sub-section, we report the quality of care outcomes from the included studies (Table 3). This review of outcomes begins by reporting findings regarding the association between burnout and patient safety (i.e., medical errors). It is followed by reporting of the acceptability outcomes as measured by patient satisfaction/perceived quality of care and physician communication/attitudes.

#### *Outcomes: Burnout and Medical Errors*

Table 3 contains the outcomes reported by the included papers. In terms of findings for the association between burnout and medical errors, there was a consistently significant relationship between burnout and medical errors among the three papers focusing on this relationship.<sup>5,28,36</sup> Shanafelt et al.<sup>36</sup> reported significantly higher odds of a major medical error during the past three months among physicians with higher EE and DP but lower odds among physicians with higher PA. Hayashino et al.<sup>28</sup> also observed significant associations between a major medical error during the past 12 months and higher levels of EE and DP; however, the relationship with PA was not significant. Klein et al.<sup>5</sup> reported significant associations between high burnout and diagnostic error, therapeutic error, sub-optimal psychosocial care, sub-optimal diagnosis and treatment, and sub-optimal quality assurance.

Table 3. Patient Safety and Acceptability Related Quality of Care Outcomes

|                                                           | Patient Safety Outcomes                                                                                                                                                                                                                                                                                                                                                                                                                                                                                                                                                                                                                                                                                                                | Acceptability Outcomes                                                                                                                                                                                                                                                                                                                                                                                                                                                                                                                                                    |                         |
|-----------------------------------------------------------|----------------------------------------------------------------------------------------------------------------------------------------------------------------------------------------------------------------------------------------------------------------------------------------------------------------------------------------------------------------------------------------------------------------------------------------------------------------------------------------------------------------------------------------------------------------------------------------------------------------------------------------------------------------------------------------------------------------------------------------|---------------------------------------------------------------------------------------------------------------------------------------------------------------------------------------------------------------------------------------------------------------------------------------------------------------------------------------------------------------------------------------------------------------------------------------------------------------------------------------------------------------------------------------------------------------------------|-------------------------|
| Author(s)                                                 | Medical Errors (ME)                                                                                                                                                                                                                                                                                                                                                                                                                                                                                                                                                                                                                                                                                                                    | Patient Satisfaction (PS)/<br>Perceived Quality of Care (QoC)                                                                                                                                                                                                                                                                                                                                                                                                                                                                                                             | Communication/Attitudes |
| Agagnostopoulos et al. (2012) <sup>29</sup><br><br>Greece |                                                                                                                                                                                                                                                                                                                                                                                                                                                                                                                                                                                                                                                                                                                                        | Correlation btwn Maslach Burnout Inventory (MBI) dimensions and PS: <ul style="list-style-type: none"> <li>• EE &amp; PS: <math>r = -0.64</math>, <math>p &lt; 0.01</math></li> <li>• DP &amp; PS: <math>r = -0.54</math>, <math>p &lt; 0.01</math></li> <li>• PA &amp; PS: <math>r = 0.26</math>, <math>p = 0.17</math></li> </ul> Results of mixed effect model with PS as outcome: <ul style="list-style-type: none"> <li>• Low EE associated with highest average PS</li> </ul> Comparison btwn moderate and high EE no significant difference in association with PS |                         |
| Halbesleben and Rathert (2008) <sup>30</sup><br><br>USA   |                                                                                                                                                                                                                                                                                                                                                                                                                                                                                                                                                                                                                                                                                                                                        | Correlation btwn MBI dimensions and PS: <ul style="list-style-type: none"> <li>• DP &amp; PS: <math>r = -0.16</math>, <math>p &lt; 0.05</math></li> </ul>                                                                                                                                                                                                                                                                                                                                                                                                                 |                         |
| Hayashino et al. (2012) <sup>28</sup><br><br>Japan        | Association btwn MBI dimensions and any medical error: <ul style="list-style-type: none"> <li>• Significant differences among tertiles for EE (<math>p = 0.026</math>) &amp; DP (<math>p = 0.002</math>)</li> </ul> % with ME by burnout dimension tertile: <ul style="list-style-type: none"> <li>EE 1<sup>st</sup> tertile: 27.9%</li> <li>EE 2<sup>nd</sup> tertile: 38.2%</li> <li>EE 3<sup>rd</sup> tertile: 33.9%</li> </ul> <ul style="list-style-type: none"> <li>DP 1<sup>st</sup> tertile: 35.0%</li> <li>DP 2<sup>nd</sup> tertile: 27.8%</li> <li>DP 3<sup>rd</sup> tertile: 37.2%</li> </ul> <ul style="list-style-type: none"> <li>• No significant differences among tertiles for PA (<math>p = 0.67</math>)</li> </ul> |                                                                                                                                                                                                                                                                                                                                                                                                                                                                                                                                                                           |                         |
| Klein et al. (2010) <sup>5</sup><br><br>Germany           | Adjusted* Odds Ratios (95% CI) for probability of error and high burnout score: <ul style="list-style-type: none"> <li>• Diagnostic error: OR = 1.66 (1.26, 2.20)</li> <li>• Therapeutic error: OR = 1.94 (1.39, 2.69)</li> </ul> *Adjusted for gender, occupational position, job experience                                                                                                                                                                                                                                                                                                                                                                                                                                          | Adjusted* Odds Ratios (95% CI) for probability of suboptimal care and high burnout score: <ul style="list-style-type: none"> <li>• Psychosocial care: OR = 1.58 (1.19, 2.10)</li> <li>• Dx/Tx: OR = 1.59 (1.17, 2.16)</li> <li>• Quality assurance: OR = 1.45 (1.10, 1.90)</li> </ul> *Adjusted for gender, occupational position, job experience                                                                                                                                                                                                                         |                         |

|                                                                   | Patient Safety Outcomes                                                                                                                                                                                      | Acceptability Outcomes                                                                                                                                                                                                                                          |                                                                                                                                                                                                                                                                                                                                                                                                                                                                                           |
|-------------------------------------------------------------------|--------------------------------------------------------------------------------------------------------------------------------------------------------------------------------------------------------------|-----------------------------------------------------------------------------------------------------------------------------------------------------------------------------------------------------------------------------------------------------------------|-------------------------------------------------------------------------------------------------------------------------------------------------------------------------------------------------------------------------------------------------------------------------------------------------------------------------------------------------------------------------------------------------------------------------------------------------------------------------------------------|
| Author(s)                                                         | Medical Errors (ME)                                                                                                                                                                                          | Patient Satisfaction (PS)/<br>Perceived Quality of Care (QoC)                                                                                                                                                                                                   | Communication/Attitudes                                                                                                                                                                                                                                                                                                                                                                                                                                                                   |
| Ratanawongsa et al. (2008) <sup>31</sup><br><br>USA               |                                                                                                                                                                                                              | Adjusted* Odds Ratios (95% CI) for probability of PS with high vs low burnout:<br>• PS: OR = 0.44 (0.18, 1.08), p=0.07<br>*Adjusted for patient health insurance, visit length, physician gender, physician IMG status, interaction btwn IMG status and burnout | Odds Ratios (95% CI) for probability of negative rapport building with medium and high vs low burnout:<br>• Medium: OR = 1.85 (1.31, 2.61), p=0.001<br>• High: OR = 2.06 (1.58, 2.86), p<0.001<br>*Adjusted for patient health insurance, visit length, physician gender, physician IMG status, interaction btwn IMG status and burnout                                                                                                                                                   |
| Shanafelt et al. (2010) <sup>36</sup><br><br>USA                  | Odds Ratios (95% CI) for perceived medical error with MBI dimensions:<br>• EE: OR = 1.048 (1.042, 1.055), p<0.0001<br>• DP: OR = 1.109 (1.096, 1.122), p<0.0001<br>• PA: OR = 0.965 (0.955, 0.975), p<0.0001 |                                                                                                                                                                                                                                                                 |                                                                                                                                                                                                                                                                                                                                                                                                                                                                                           |
| Shirom et al. (2006) <sup>37</sup><br><br>Israel                  |                                                                                                                                                                                                              | Structural equation model examining relationships of autonomy, burnout and QoC:<br>• Relationship btwn global burnout and QoC not significant ( $\beta = -0.12$ , p>0.05)<br>• EE exhaustion negatively related to QoC ( $\beta = -0.40$ , p<0.05)              |                                                                                                                                                                                                                                                                                                                                                                                                                                                                                           |
| Travado et al. (2005) <sup>32</sup><br><br>Italy, Spain, Portugal |                                                                                                                                                                                                              |                                                                                                                                                                                                                                                                 | Correlations btwn MBI burnout dimensions and communication:<br><br>Self-Confidence in Communication Skills<br>• EE: r = -.03, not significant<br>• DP: r = -0.08, not significant<br>• PA: r = 0.37, p<0.01<br><br>Negative Expected Outcomes of Communication<br>• EE: r = -0.21, p<0.05<br>• DP: r = -0.25, p<0.01<br>• PA: r = 0.28, p<0.01<br><br>Positive Expected Outcomes of Communication<br>• EE: r = 0.01, not significant<br>• DP: r = 0.34, p<0.01<br>• PA: r = -0.28, p<0.01 |



|                                              | Patient Safety Outcomes | Acceptability Outcomes                                                                                                                                                                                                                                                                                                                        |                         |
|----------------------------------------------|-------------------------|-----------------------------------------------------------------------------------------------------------------------------------------------------------------------------------------------------------------------------------------------------------------------------------------------------------------------------------------------|-------------------------|
| Author(s)                                    | Medical Errors (ME)     | Patient Satisfaction (PS)/<br>Perceived Quality of Care (QoC)                                                                                                                                                                                                                                                                                 | Communication/Attitudes |
| Weigl et al. (2015) <sup>38</sup><br>Germany |                         | Adjusted* Odds Ratios (95% CI) for probability of low QoC with MBI dimensions (Low vs High):<br><ul style="list-style-type: none"> <li>• EE: OR = 0.75 (0.08, 1.42), p&lt;0.05</li> <li>• DP: OR = 0.17 (-0.45, 0.80), not significant</li> </ul> *Adjusted for gender, professional tenure, clinical work environment, career stage/position |                         |
| Weng et al. (2011) <sup>33</sup><br>Taiwan   |                         | Correlation btwn MBI burnout dimensions and PS:<br><ul style="list-style-type: none"> <li>• EE: not significant</li> <li>• DP: negative relationship (p&lt;0.01)</li> <li>• PA: not significant</li> </ul>                                                                                                                                    |                         |

### *Outcomes: Burnout and Patient Satisfaction/Quality of Care*

Among the four studies that examined the relationship between burnout and patient satisfaction/quality of care, three observed a significant relationship between either burnout or at least one dimension of burnout.<sup>29-31,33</sup> The one study<sup>31</sup> that combined the MBI EE and PA dimensions to create a single burnout score did not find a significant relationship between the score and patient satisfaction. Because it used only two subscales and one of them was PA rather than DP, it is not clear regarding the extent to which their choice of sub-scales was consistent with the other measures of burnout.

Among the three studies that reported separate MBI dimensions, there seemed to be a consistent observation that high DP is significantly related to lower patient satisfaction.<sup>29,30,33</sup> However, the significance of the association between EE and patient satisfaction varied among studies; Agagnostopoulos et al.<sup>29</sup> reported a significant correlation but Weng et al.<sup>33</sup> did not.

At the same time, Shirom et al.<sup>37</sup> described a significantly negative relationship between high EE and physician perceived quality of care. Weigl and colleagues<sup>38</sup> also found a significant

1  
2  
3 negative relationship with EE but did not find a significant relationship between DP and  
4  
5 physician perceived quality of care.  
6

#### 7 *Outcomes: Burnout and Communication/Attitudes*

8  
9  
10 Travado et al.<sup>32</sup> found a significantly positive relationship between PA and self-  
11  
12 confidence in communication skills as well as with negative expected outcomes of  
13  
14 communication. They also observed a significantly negative association between PA and positive  
15  
16 expected outcomes of communication. In addition, Ratanawongsa et al.<sup>31</sup> reported a higher  
17  
18 probability of negative rapport with medium and high burnout.  
19  
20

## 21 **DISCUSSION**

22  
23  
24 This systematic literature review identified 10 studies of which nine had a moderate risk  
25  
26 of bias and one with a low risk of bias. The results of these physician burnout studies show that  
27  
28 patient safety has been primarily measured by examining medical errors. The acceptability  
29  
30 outcomes have been captured using two groups of indicators that measure patient  
31  
32 satisfaction/perceived quality of care and physician communication/attitudes towards patients.  
33  
34 The majority of these studies examined the relationship between burnout and acceptability.  
35  
36 Among the acceptability-related quality of care outcomes, the focus has been on patient  
37  
38 satisfaction/perceived quality of care.  
39  
40  
41

42  
43 The results of the three included studies that reported on the relationship between burnout  
44  
45 and medical errors suggest there is evidence that burnout is associated with physician self-  
46  
47 perceived medical errors and sub-optimal care. However, there is equivocal evidence that  
48  
49 specific dimensions of burnout are related to the acceptability dimension of quality of care as  
50  
51 measured by patient satisfaction, perceived quality of care, or physician  
52  
53 communication/attitudes. Thus, the current body of evidence suggests there is moderate  
54  
55  
56  
57  
58  
59

1  
2  
3 evidence for the association between burnout and safety aspects of healthcare whereas the  
4  
5 evidence is weaker for the patient-related acceptability aspects of quality.  
6

### 7 **Strengths and Limitations of Interpreting the Literature**

8  
9  
10 One of important questions raised by burnout studies in general is highlighted by Klein et  
11 al.'s<sup>5</sup> and Shirom et al.'s<sup>37</sup> use of non-MBI scales. Klein and colleagues<sup>5</sup> used the Copenhagen  
12 Burnout Inventory while Shirom et al.<sup>37</sup> used the Shirom-Melamed Burnout Measure. One of  
13  
14 criticisms that the separate developers of these two scales raise is that the MBI does not fully  
15  
16 assess burnout.<sup>37,39</sup> Rather, both groups argue that fatigue and exhaustion are fundamental to the  
17  
18 definition of burnout.<sup>37,39</sup> However, this emphasis on exhaustion may be reflected in the fact that  
19  
20 EE is the most widely studied of the MBI dimensions.<sup>50</sup> This would argue for the assessment of  
21  
22 this dimension in studies of burnout and the individual reporting of it.  
23  
24  
25  
26  
27

28  
29 Another limitation of these studies was the reliance on physician self-report data for the  
30  
31 assessment of medical errors. The self-report could be influenced by a number of factors  
32  
33 including recall bias and social desirability. There is a potential additional bias introduced if  
34  
35 self-report is used for both the outcome and the problem.<sup>51</sup> The presence of burnout could also  
36  
37 influence perceptions. For example, Fahrenkopf et al.<sup>52</sup> observed a discrepancy between the  
38  
39 results of chart audits and physician self-report; those with higher burnout scores reported higher  
40  
41 numbers of medical errors than the chart audits would suggest.  
42  
43  
44

45  
46 An alternative to self-report would be observational data. However, watching physicians  
47  
48 while they practiced could lead to a Hawthorne Effect. Another alternative would be to review  
49  
50 medical records to identify errors. But, this relies on the accuracy of the records. Also, it is not  
51  
52 clear what types of medical errors should be assessed – major errors leading to an adverse event  
53  
54 or any medical error regardless of outcome? In their study, Fahrenkopf et al.<sup>52</sup> used a  
55  
56  
57  
58  
59  
60

1  
2  
3 standardized method to abstract information from charts and trained reviewers to categorize the  
4 errors into groups: (1) preventable adverse event, (2) non-preventable adverse event, (3) potential  
5 adverse event, and (4) error with little potential for harm. Further work could examine how  
6  
7 physicians define errors as well as the reliability of error self-report. In addition, to improve the  
8 comparability of outcomes, future studies could incorporate and report severity of medical error  
9 scores.

10  
11  
12  
13  
14  
15  
16  
17 There was a diverse set of measures used in the studies that focused on patient  
18 satisfaction and quality of care. They varied in what and how they measured the outcome. For  
19 example, perceived quality of care was assessed using a variety of measures that ranged from  
20 two items for which the psychometric properties were not tested to a scale designed to assess  
21 service quality on six dimensions. Thus, it is difficult to discern the extent to which the study  
22 results could be attributed to the differences in the dimensions assessed. Further exploration  
23 along this line of inquiry could be undertaken to understand the aspects of satisfaction and  
24 perceived quality of care that are significantly associated with burnout.

25  
26  
27  
28  
29  
30  
31  
32  
33  
34  
35 An additional limitation of the existing body of literature is the reliance on cross-  
36 sectional study designs. Cross-sectional design limits conclusions regarding causality. Cross-  
37 sectional data does not distinguish the sequence of conditions. For example, did burnout cause  
38 decreased quality of care? Or, did decreased quality of care cause burnout? At best, the cross-  
39 sectional data used in these studies can only be used to determine that there is a relationship. At  
40 that same time, there is evidence from studies that have used longitudinal data to examine  
41 burnout and medical errors among residents that there is a causal relationship such that burnout  
42 causes errors.<sup>53</sup> However, the longitudinal data that contributes to strength of West et al.'s is  
43 potentially weakened by the self-reported medical errors.

1  
2  
3 Finally, only one study<sup>5</sup> described the population from which the study sample was  
4 drawn. Thus, it is difficult to determine whether there was a difference between the study  
5 participants and non-participants. To aid in the interpretation of the results (i.e., the  
6 generalizability), it would be useful for future studies to report this type of information.  
7  
8  
9

### 10 11 12 **Strengths and Limitations of the Search Strategy** 13

14 Although five databases were used in the search, articles that did not appear in any of the  
15 databases would have been missed. To decrease the possibility of this occurring, we employed a  
16 broad scope in development of the search terms for each database and followed this with a hand  
17 search of included articles. Another potential limitation is the fact that the search focused on  
18 articles published in English-language journals. However, despite the English-language  
19 constraint, the identified studies originated in European, Middle Eastern, North American and  
20 Asian countries. This indicates that although the research was not conducted in countries where  
21 English is the first language, at least some of these researchers publish in English-language  
22 journals. Finally, there is also a potential limitation associated with focusing on published peer-  
23 reviewed articles. In doing so, we may be subject to publication bias.<sup>54</sup> At the same time, the  
24 quality of the gray literature has been question because it is not necessarily subject to critical  
25 assessment prior to being published.<sup>55</sup> As a result, unpublished studies may be of lower quality  
26 and have greater risk of bias in their study designs.  
27  
28  
29  
30  
31  
32  
33  
34  
35  
36  
37  
38  
39  
40  
41  
42  
43

### 44 **CONCLUSIONS** 45

46 The focus on quality related to direct care can highlight additional ways that physician  
47 burnout affects the healthcare system. These results contribute evidence about whether the  
48 effects of physician burnout are limited to physicians or whether consequences of physician  
49  
50  
51  
52  
53  
54  
55  
56  
57  
58  
59  
60

1  
2  
3 burnout are more extensive. They also can help to inform decisions about how to improve  
4 patient care by addressing physician burnout.  
5  
6

7  
8 The results of this systematic literature review suggest that there is moderate evidence  
9 that burnout is associated with safety-related quality of care. Because of the variability in the  
10 way patient acceptability-related quality of care was measured and the inconsistency in study  
11 findings, the evidence supporting the relationship between burnout and patient acceptability-  
12 related quality of care is less strong. Future research evaluating burnout interventions for  
13 physicians could consider looking at safety-related quality of care to assess the effectiveness of  
14 these interventions. Continued work looking at the relationship between dimensions of  
15 acceptability-related quality of measures and burnout is warranted.  
16  
17  
18  
19  
20  
21  
22  
23  
24  
25

## 26 **DATA SHARING STATEMENT**

27  
28 All the published papers used in this manuscript are publicly available. There are no data  
29 available.  
30  
31

## 32 **FUNDING**

33  
34 This work was funded by a Arnold P. Gold Foundation Mapping the Landscape grant. Any  
35 views expressed or errors are the sole responsibility of the authors.  
36  
37  
38

## 39 **COMPETING INTERESTS**

40  
41 The authors declare that they have no competing interests.  
42  
43

## 44 **CONTRIBUTORSHIP STATEMENT**

45  
46 CSD led the conception, design, data acquisition, analysis and interpretation of the data; she also  
47 led the writing of the overall manuscript. DL collaborated on the design, data acquisition and  
48 analysis; he contributed to the writing of the overall manuscript and led the writing of the  
49 Methods section. SB collaborated on the design and data acquisition and contributed to the  
50  
51  
52  
53  
54  
55  
56  
57  
58  
59  
60

1  
2  
3 writing of the manuscript. LT collaborated on the data acquisition and analysis. All authors read  
4  
5 and approved the final manuscript. All authors are guarantors of the final manuscript.  
6  
7  
8  
9  
10  
11  
12  
13  
14  
15  
16  
17  
18  
19  
20  
21  
22  
23  
24  
25  
26  
27  
28  
29  
30  
31  
32  
33  
34  
35  
36  
37  
38  
39  
40  
41  
42  
43  
44  
45  
46  
47  
48  
49  
50  
51  
52  
53  
54  
55  
56  
57  
58  
59  
60

## REFERENCES

1. Allegra CJ, Hall R, Yothers G. Prevalence of burnout in the u.s. Oncology community: results of a 2003 survey. *J Oncol Pract* 2005;1(4):140-147.
2. Arigoni F, Bovier PA, Sappino AP. Trend of burnout among Swiss doctors. *Swiss Med Wkly* 2010;140:w13070.
3. Elit L, Trim K, Mand-Bains IH, Sussman J, Grunfeld E. Job satisfaction, stress, and burnout among Canadian gynecologic oncologists. *Gynecol Oncol* 2004;94(1):134-139.
4. Embriaco N, Azoulay E, Barrau K, et al. High level of burnout in intensivists: prevalence and associated factors. *Am J Respir Crit Care Med* 2007;175(7):686-692.
5. Klein J, Grosse Frie K, Blum K, von dem Knesebeck O. Burnout and perceived quality of care among German clinicians in surgery. *Int J Qual Health Care* 2010;22(6):525-530.
6. Maslach C, Jackson SE. The measurement of experienced burnout. *Journal of Occupational Behaviour* 1981;2:99-113.
7. Maslach C, Schaufeli WB, Leiter MP. Job burnout. *Annu Rev Psychol* 2001;52:397-422.
8. Dewa CS, Jacobs P, Thanh NX, Loong D. An estimate of the cost of burnout on early retirement and reduction in clinical hours of practicing physicians in Canada. *BMC Health Serv Res* 2014;14:254.
9. Sharma A, Sharp DM, Walker LG, Monson JR. Stress and burnout in colorectal and vascular surgical consultants working in the UK National Health Service. *Psychooncology* 2008;17(6):570-576.
10. Siu CFY, Yuen SK, Cheung A. Burnout among public doctors in Hong Kong: cross-sectional survey. *Hong Kong Medical Journal* 2012;18(3):186-192.
11. Asai M, Morita T, Akechi T, et al. Burnout and psychiatric morbidity among physicians engaged in end-of-life care for cancer patients: a cross-sectional nationwide survey in Japan. *Psychooncology* 2007;16(5):421-428.
12. Dewa CS, Loong D, Bonato S, Thanh NX, Jacobs P. How does burnout affect physician productivity? A systematic literature review. *BMC Health Serv Res* 2014;14:325.
13. World Health Organization. *Quality of care: A process for making strategic choices in health systems*. Geneva 2006.
14. Institute of Medicine. *Crossing the Quality Chasm: A New Health System for the 21st Century*. Washington, D.C. 2001.
15. Roberts JS. Chapter 1 Quality Health Care: Its Definitions and Evaluation. In: Huges EFX, ed. *Perspectives on Quality in American Health Care*. Washington, DC: McGraw-Hill, Inc.; 1988.
16. Wallace JE, Lemaire JB, Ghali WA. Physician wellness: a missing quality indicator. *Lancet* 2009;374(9702):1714-1721.
17. de Jong MA, Nieuwenhuijsen K, Sluiter JK. Common mental disorders related to incidents and behaviour in physicians. *Occup Med (Lond)* 2016;66(7):506-513.
18. Hall LH, Johnson J, Watt I, Tsipa A, O'Connor DB. Healthcare Staff Wellbeing, Burnout, and Patient Safety: A Systematic Review. *PLoS One* 2016;11(7):e0159015.
19. Williams ES, Skinner AC. Outcomes of physician job satisfaction: a narrative review, implications, and directions for future research. *Health Care Manage Rev* 2003;28(2):119-139.
20. Angerer P, Weigl M. Physicians' psychosocial work conditions and quality of care: A literature review. *Professions & Professionalism* 2015;5(1):1-14.



21. Lee RT, Seo B, Hladkyj S, Lovell BL, Schwartzmann L. Correlates of physician burnout across regions and specialties: a meta-analysis. *Hum Resour Health* 2013;11:48.
22. Moher D, Liberati A, Tetzlaff J, Altman DG, Group P. Preferred reporting items for systematic reviews and meta-analyses: the PRISMA statement. *PLoS Med* 2009;6(7):e1000097.
23. McGowan J, Sampson M, Salzwedel DM, Cogo E, Foerster V, Lefebvre C. PRESS Peer Review of Electronic Search Strategies: 2015 Guideline Statement. *J Clin Epidemiol* 2016;75:40-46.
24. Cohen J. A Coefficient of Agreement for Nominal Scales. *Educational and Psychological Measurement* 1960;20(1):37-46.
25. Sanderson S, Tatt ID, Higgins JP. Tools for assessing quality and susceptibility to bias in observational studies in epidemiology: a systematic review and annotated bibliography. *Int J Epidemiol* 2007;36(3):666-676.
26. von Elm E, Altman DG, Egger M, et al. The Strengthening the Reporting of Observational Studies in Epidemiology (STROBE) statement: guidelines for reporting observational studies. *PLoS Med* 2007;4(10):e296.
27. Lagerveld SE, Bultmann U, Franche RL, et al. Factors associated with work participation and work functioning in depressed workers: a systematic review. *Journal of occupational rehabilitation* 2010;20(3):275-292.
28. Hayashino Y, Utsugi-Ozaki M, Feldman MD, Fukuhara S. Hope modified the association between distress and incidence of self-perceived medical errors among practicing physicians: prospective cohort study. *PLoS One* 2012;7(4):e35585.
29. Anagnostopoulos F, Liolios E, Persefonis G, Slater J, Kafetsios K, Niakas D. Physician burnout and patient satisfaction with consultation in primary health care settings: evidence of relationships from a one-with-many design. *J Clin Psychol Med Settings* 2012;19(4):401-410.
30. Halbesleben JR, Rathert C. Linking physician burnout and patient outcomes: exploring the dyadic relationship between physicians and patients. *Health Care Manage Rev* 2008;33(1):29-39.
31. Ratanawongsa N, Roter D, Beach MC, et al. Physician burnout and patient-physician communication during primary care encounters. *J Gen Intern Med* 2008;23(10):1581-1588.
32. Travado L, Grassi L, Gil F, Ventura C, Martins C, Southern European Psycho-Oncology Study G. Physician-patient communication among Southern European cancer physicians: the influence of psychosocial orientation and burnout. *Psychooncology* 2005;14(8):661-670.
33. Weng HC, Hung CM, Liu YT, et al. Associations between emotional intelligence and doctor burnout, job satisfaction and patient satisfaction. *Med Educ* 2011;45(8):835-842.
34. Baker R. Development of a questionnaire to assess patients' satisfaction with consultations in general practice. *Br J Gen Pract* 1990;40(341):487-490.
35. Scardina SA. SERVQUAL: a tool for evaluating patient satisfaction with nursing care. *J Nurs Care Qual* 1994;8(2):38-46.
36. Shanafelt TD, Balch CM, Bechamps G, et al. Burnout and medical errors among American surgeons. *Ann Surg* 2010;251(6):995-1000.
37. Shirom A, Nirel N, Vinokur AD. Overload, autonomy, and burnout as predictors of physicians' quality of care. *J Occup Health Psychol* 2006;11(4):328-342.

- 1  
2  
3 38. Weigl M, Schneider A, Hoffmann F, Angerer P. Work stress, burnout, and perceived  
4 quality of care: a cross-sectional study among hospital pediatricians. *Eur J Pediatr*  
5 2015;174(9):1237-1246.  
6  
7 39. Kristensen TS, Borritz M, Villadsen E, Christensen KB. The Copenhagen Burnout  
8 Inventory: A new tool for the assessment of burnout. *Work Stress* 2005;19:192-207.  
9  
10 40. Lundgren-Nilsson A, Jonsdottir IH, Pallant J, Ahlberg G, Jr. Internal construct validity of  
11 the Shirom-Melamed Burnout Questionnaire (SMBQ). *BMC Public Health* 2012;12:1.  
12  
13 41. Shirom A, Melamed S. A Comparison of the Construct Validity of Two Burnout  
14 Measures in Two Groups of Professionals. *International Journal of Stress Management*  
15 2006;13(2):176-200.  
16  
17 42. Qiao H, Schaufeli WB. The Convergent Validity of Four Burnout Measures in a Chinese  
18 Sample: A Confirmatory Factor-Analytic Approach. *Applied Psychology* 2011;60(1):87-  
19 111.  
20  
21 43. Winwood PC, Winefield AH. Comparing two measures of burnout among dentists in  
22 Australia. *International Journal of Stress Management* 2004;11:282-289.  
23  
24 44. Hall W, Violato C, Lewkonja R, et al. Assessment of physician performance in Alberta:  
25 the physician achievement review. *CMAJ* 1999;161(1):52-57.  
26  
27 45. Parasuraman A, Zeithaml VA, Berry LL. SERVQUAL: A multiple-item scale for  
28 measuring consumer perceptions of service quality. *Journal of Retailing* 1988;64:12-40.  
29  
30 46. Kersnik J. Patients' recommendation of doctor as an indicator of patient satisfaction.  
31 *Hong Kong Medical Journal* 2003;9(4):247-250.  
32  
33 47. Roter D. An exploration of health education's responsibility for a partnership model of  
34 client-provider relations. *Patient Educ Couns* 1987;9(1):25-31.  
35  
36 48. Roter DL, Stewart M, Putnam SM, Lipkin M, Jr., Stiles W, Inui TS. Communication  
37 patterns of primary care physicians. *JAMA* 1997;277(4):350-356.  
38  
39 49. Parle M, Maguire P, Heaven C. The development of a training model to improve health  
40 professionals' skills, self-efficacy and outcome expectancies when communicating with  
41 cancer patients. *Soc Sci Med* 1997;44(2):231-240.  
42  
43 50. Schaufeli WB, Leiter MP, Maslach C. Burnout: 35 years of research and practice. *Career*  
44 *Development International* 2009;14(3):204-220.  
45  
46 51. Podsakoff PM, MacKenzie SB, Lee JY, Podsakoff NP. Common method biases in  
47 behavioral research: a critical review of the literature and recommended remedies. *J Appl*  
48 *Psychol* 2003;88(5):879-903.  
49  
50 52. Fahrenkopf AM, Sectish TC, Barger LK, et al. Rates of medication errors among  
51 depressed and burnt out residents: prospective cohort study. *BMJ* 2008;336(7642):488-  
52 491.  
53  
54 53. West CP, Tan AD, Habermann TM, Sloan JA, Shanafelt TD. Association of resident  
55 fatigue and distress with perceived medical errors. *JAMA* 2009;302(12):1294-1300.  
56  
57 54. Nissen SB, Magidson T, Gross K, Bergstrom CT. Publication Bias and the Cannonization  
58 of False Facts. *arXiv:1609.00494v1 [physics.soc-ph]* 2016.  
59  
60 55. Martin JL, Perez V, Sacristan M, Alvarez E. Is grey literature essential for a better  
control of publication bias in psychiatry? An example from three meta-analyses of  
schizophrenia. *Eur Psychiatry* 2005;20(8):550-553.

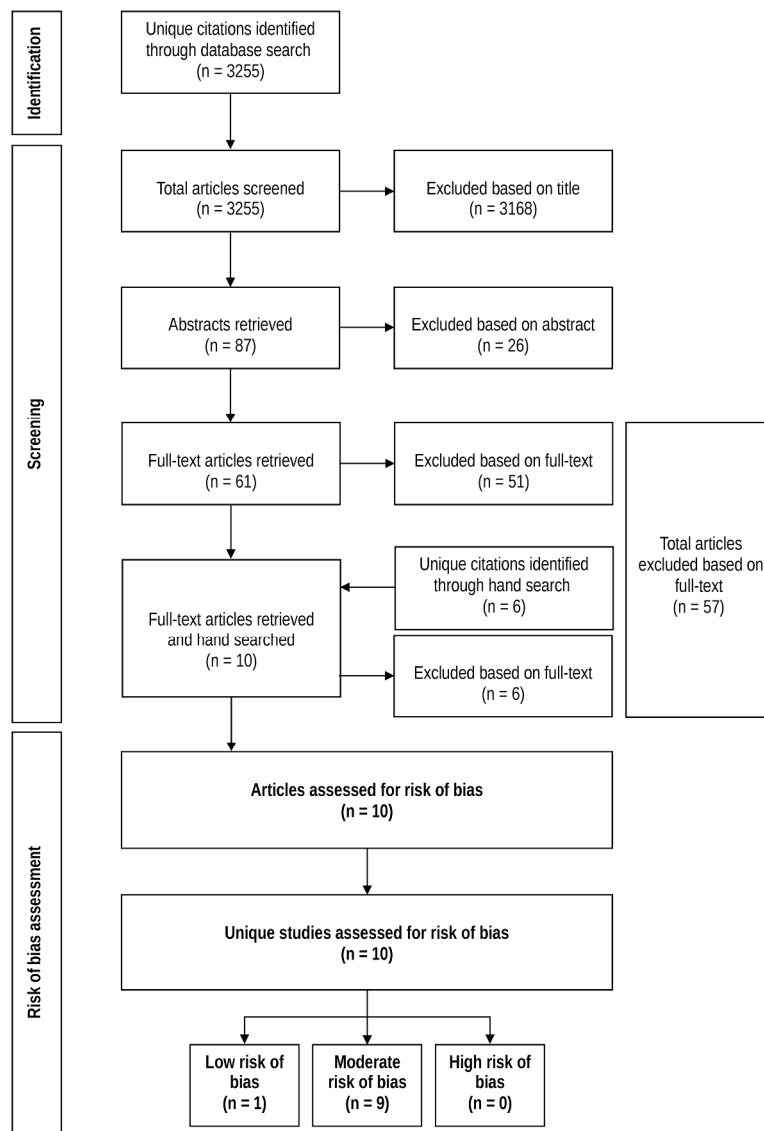

Figure 1. Flowchart of literature search results and the selection process of accepted/rejected articles

279x361mm (300 x 300 DPI)

1  
2  
3  
4  
5  
6  
7  
8  
9  
10  
11  
12  
13  
14  
15  
16  
17  
18  
19  
20  
21  
22  
23  
24  
25  
26  
27  
28  
29  
30  
31  
32  
33  
34  
35  
36  
37  
38  
39  
40  
41  
42  
43  
44  
45  
46  
47  
48  
49  
50  
51  
52  
53  
54  
55  
56  
57  
58  
59  
60

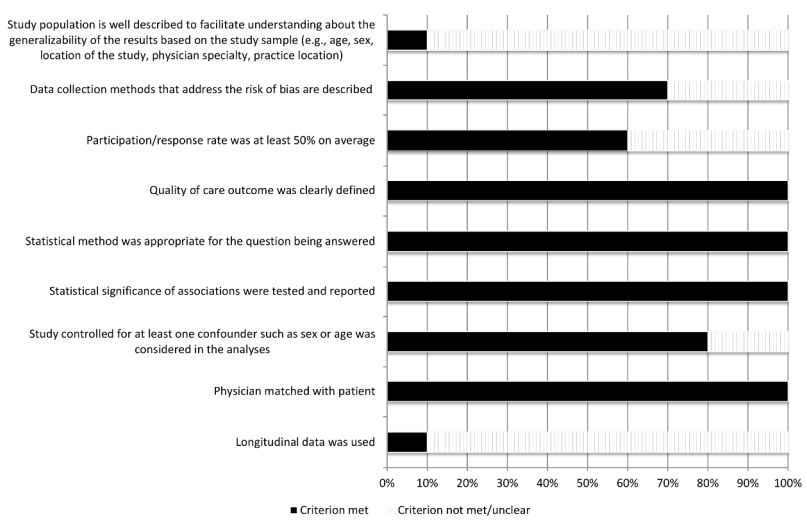

Figure 2. Summary of risk of bias assessment results for across accepted studies

279x215mm (300 x 300 DPI)

View only

# BMJ Open

## The Relationship between Physician Burnout and Quality of Healthcare in terms of Safety and Acceptability – A Systematic Review

|                                 |                                                                                                                                                                                                                                                                                                                                                                                                                                                   |
|---------------------------------|---------------------------------------------------------------------------------------------------------------------------------------------------------------------------------------------------------------------------------------------------------------------------------------------------------------------------------------------------------------------------------------------------------------------------------------------------|
| Journal:                        | <i>BMJ Open</i>                                                                                                                                                                                                                                                                                                                                                                                                                                   |
| Manuscript ID                   | bmjopen-2016-015141.R1                                                                                                                                                                                                                                                                                                                                                                                                                            |
| Article Type:                   | Research                                                                                                                                                                                                                                                                                                                                                                                                                                          |
| Date Submitted by the Author:   | 14-Feb-2017                                                                                                                                                                                                                                                                                                                                                                                                                                       |
| Complete List of Authors:       | Dewa, C; University of California Davis School of Medicine, Dept of Psychiatry and Behavioral Sciences<br>Loong, Desmond; Centre for Addiction and Mental Health, Centre for Research on Employment and Workplace Health<br>Bonato, Sarah; Centre for Addiction and Mental HealthCentre for Addiction and Mental Health, Library Services<br>Trojanowski, Lucy; Centre for Addiction and Mental HealthCentre for Addiction and Mental Health, SER |
| <b>Primary Subject Heading</b>: | Mental health                                                                                                                                                                                                                                                                                                                                                                                                                                     |
| Secondary Subject Heading:      | Health policy, Health services research                                                                                                                                                                                                                                                                                                                                                                                                           |
| Keywords:                       | burnout, physicians, quality of care                                                                                                                                                                                                                                                                                                                                                                                                              |
|                                 |                                                                                                                                                                                                                                                                                                                                                                                                                                                   |

SCHOLARONE™  
Manuscripts

Only

1  
2  
3 **The Relationship between Physician Burnout and Quality of Healthcare in terms of Safety**  
4 **and Acceptability – A Systematic Review**  
5  
6

7  
8 Carolyn S. Dewa <sup>1,2§</sup>, Desmond Loong <sup>2</sup>, Sarah Bonato <sup>3</sup>, Lucy Trojanowski <sup>2</sup>  
9

10  
11 <sup>1</sup>University of California, Davis, Department of Psychiatry and Behavioral Sciences, Grange  
12 Building, 2103 Stockton Boulevard, Sacramento, California 95817, USA

13 <sup>2</sup>Centre for Addiction and Mental Health, Centre for Research on Employment and Workplace  
14 Health, 33 Russell Street, Toronto, M5S 2S1, Canada

15 <sup>3</sup>Library Services, Centre for Addiction and Mental Health, 33 Russell Street, Toronto, M5S 2S1,  
16 Canada  
17  
18

19 §Corresponding author:

20 Carolyn S. Dewa, MPH, PhD  
21 Professor, University of California, Davis  
22 Department of Psychiatry and Behavioral Sciences  
23 Grange Building, 2103 Stockton Boulevard  
24 Sacramento, California 95817 USA  
25 (916) 703-5656  
26 e-mail: csdewa@ucdavis.edu  
27  
28  
29  
30

31 Keywords: burnout, physicians, quality of healthcare  
32

33 Word count: 5,430

34 Number of figures: 2

35 Number of tables: 2

36 Number of references: 64

37 Number of supplementary files: 3  
38  
39  
40  
41  
42  
43  
44  
45  
46  
47  
48  
49  
50  
51  
52  
53  
54  
55  
56  
57  
58  
59  
60

## The Relationship between Physician Burnout and Quality of Healthcare in terms of Safety and Acceptability – A Systematic Review

### Abstract

**Objectives.** This study reviews the current state of the published peer-reviewed literature related to physician burnout and two quality of care dimensions. The purpose of this systematic literature review is to address the question, “How does physician burnout affect the quality of healthcare related to the dimensions of acceptability and safety?”

**Design.** Using a multi-phase screening process, this systematic literature review is based on publically available peer-reviewed studies published between 2002-2017. Six electronic databases were searched: (1) *Medline Current*, (2) *Medline In-process*, (3) *Medline Epub Ahead of Print*, (4) *PsycINFO*, (5) *Embase*, and (6) *Web of Science*.

**Setting.** Physicians practicing in civilian settings.

**Participants.** Practicing physicians who have completed training.

**Primary and secondary outcome measures.** Quality of healthcare related to acceptability (i.e., patient satisfaction, physician communication, physician attitudes) and safety (i.e., minimizing risks or harm to patients)

**Results.** 4,114 unique citations were identified. Of these, 12 articles were included in the review. Two studies were rated as having high risk of bias and 10 as having moderate risk. Four studies were conducted in North America; four in Europe, one in the Middle East, and three in East Asia. Results of this systematic literature review suggest there is moderate evidence that burnout is associated with safety-related quality of care. Because of the variability in the way patient acceptability-related quality of care was measured and the inconsistency in study findings, the evidence supporting the relationship between burnout and patient acceptability-related quality of care is less strong.

**Conclusions.** The focus on direct care-related quality highlights additional ways that physician burnout affects the healthcare system. These studies can help to inform decisions about how to improve patient care by addressing physician burnout. Continued work looking at the relationship between dimensions of acceptability-related quality of care measures and burnout is needed to advance the field.

## ARTICLE SUMMARY

### STRENGTHS AND LIMITATIONS OF THIS STUDY:

- Few studies have examined the current state of knowledge about the relationship between physician burnout and the patient safety and acceptability dimensions of quality of care.
- This systematic literature review employed a broad search of six electronic databases: (1) *Medline Current*, (2) *Medline In-process*, (3) *Medline Epub Ahead of Print*, (4) *PsycINFO*, (5) *Embase*, and (6) *Web of Science*. A manual search was also conducted. In total, 4,114 unique citations were identified and reviewed by three reviewers in pairs.
- We used a comprehensive search strategy that follows the recommended best practices of incorporating adjacency commands and synonyms for keywords.
- One of the limitations of the search strategy employed in this systematic review is its focus on English-language publications.
- Another potential limitation of the search strategy is the focus on published peer-reviewed articles. In doing so, our results may be subject to publication bias.



## **The Relationship between Physician Burnout and Quality of Healthcare in terms of Safety and Acceptability – A Systematic Review**

Reports from around the world indicate that about one-third to one-half of physicians experience at least one dimension of burnout.<sup>1-5</sup> Burnout has been conceptualized as a syndrome consisting of three dimensions: emotional exhaustion (EE), depersonalization (DP) and low personal accomplishment (PA).<sup>6</sup> Maslach et al.<sup>7</sup> define EE as referring to “feelings of being overextended and depleted of one’s emotional and physical resources.” DP is also referred to as cynicism and defined as “a negative, callous, or excessively detached response to various aspects”.<sup>7</sup> PA is also referred to as professional efficacy and “it refers to feelings of incompetence and a lack of achievement and productivity at work”.<sup>7</sup> Burnout has been observed to affect personal well-being through low job satisfaction<sup>8-10</sup> and decreased mental health.<sup>11</sup>

Because physicians play an integral role in the healthcare system, the effects of physician burnout are not limited to the physicians experiencing it. Rather, physician burnout potentially impacts the entire healthcare system. For example, a recent systematic literature review reported a negative relationship between burnout and productivity (i.e., early retirement, work cutback, and quitting).<sup>12</sup> The impact of productivity loss related to burnout could lead to fewer available healthcare resources that in turn, can result in healthcare service waitlists. One estimate of the costs of physician work cutback and early retirement related to burnout suggests it totals to at least CAD \$213 million in patient services losses.<sup>8</sup>

This raises another question about physicians who continue to practice despite experiencing burnout. Does burnout affect their practice? There is evidence that physician burnout is also related to decreased quality of patient care.<sup>5</sup> The World Health Organization (WHO)<sup>13</sup> and the Institute of Medicine (IOM)<sup>14</sup> suggest that there are six dimensions for quality of healthcare: effectiveness, efficiency, accessibility, equitability, acceptability, and safety.

1  
2  
3 The purpose of this systematic literature review is to address the question, “How does  
4 physician burnout affect the quality of healthcare related to the dimensions of acceptability and  
5 safety?” In this review, we focus on two dimensions of quality – acceptability (i.e., patient  
6 satisfaction, perceived quality of care, and communication) and safety (i.e., minimizing risks or  
7 harm to patients). We choose these two dimensions because they reflect the quality of patient-  
8 physician interactions.<sup>15</sup> That is, if a clinician’s wellbeing is compromised, their patient  
9 interactions may also be negatively affected.<sup>16</sup> In contrast, effectiveness, efficiency,  
10 accessibility, equitability reflect the systems (i.e., infrastructure, information technology,  
11 payment policies) in which practice is conducted.<sup>14</sup>  
12  
13  
14  
15  
16  
17  
18  
19  
20  
21  
22

## 23 **Background**

24  
25  
26 There has been growing interest in the relationship between healthcare professional  
27 wellbeing and quality of patient care. Although the WHO<sup>13</sup> and IOM<sup>14</sup> identify six dimensions  
28 of quality of healthcare, attention has focused on the dimension of patient safety. Recently, there  
29 have been four published reviews that focus on the relationship between healthcare professional  
30 wellbeing and patient safety.<sup>17-20</sup> For example, Hall et al.<sup>18</sup> consider healthcare staff wellbeing  
31 and Salyers et al.<sup>20</sup> examine staff burnout as opposed to specifically examining physician  
32 burnout as our review does. de Jong et al.<sup>17</sup> examine common mental disorders as opposed to  
33 burnout. Williams and Skinner<sup>19</sup> look at physician satisfaction rather than burnout. Each of  
34 these published reviews answer questions that are different from the one addressed in our review.  
35 Because they seek to answer different questions, they employ search strategies and  
36 inclusion/exclusion criteria that are different from those used in our review. Consequently, they  
37 include different articles. For example, Hall et al.’s<sup>18</sup> review does not include nine articles that  
38 are included in our systematic review. Among these, there are six articles related to  
39  
40  
41  
42  
43  
44  
45  
46  
47  
48  
49  
50  
51  
52  
53  
54  
55  
56  
57  
58  
59  
60

1  
2  
3 acceptability and three articles related to patient safety that were not included in Hall et al.'s<sup>18</sup>  
4  
5 review. In comparison to de Jong et al.'s review,<sup>17</sup> our review has six articles on acceptability  
6  
7 and five on patient safety that are unique to our systematic review. None of the articles included  
8  
9 in our review were included in Williams and Skinner's.<sup>19</sup> Compared to the papers included in  
10  
11 Salyers et al.'s<sup>20</sup> review, there are four papers related to physician burnout and safety that are  
12  
13 unique to our review and two focused on acceptability that are unique to our review. Thus, our  
14  
15 review includes papers that have not been considered together to look at quality of care related to  
16  
17 physician interactions with patients and the impact of burnout on physicians.  
18  
19

20  
21 In addition, none of the published reviews considers the quality of care dimension of  
22  
23 acceptability for physicians who have completed training. Yet, along with patient safety, this  
24  
25 dimension reflects the quality of interactions between providers and patients. The physician-  
26  
27 patient interactions are one of the fundamental interactions in healthcare.<sup>15,19</sup> Furthermore, the  
28  
29 IOM<sup>14</sup> asserts that the rise in chronic illnesses necessitates quality interactions to enhance the  
30  
31 collaboration between the physician and patient. Quality of physician-patient interactions is  
32  
33 reflected in communication, perceived quality of care, and patient satisfaction.<sup>14,15</sup> It is the  
34  
35 physician-patient interaction that supports the collaboration that will lead to better patient  
36  
37 outcomes.<sup>15</sup>  
38  
39

40  
41  
42 Wallace et al.<sup>16</sup> assert that physician wellbeing could be used as a quality indicator. The  
43  
44 argument could be strengthened by also understanding how wellbeing is associated with the  
45  
46 physician-patient interaction-related quality dimensions of safety and acceptability. In particular,  
47  
48 burnout could be a focus because it reflects wellbeing and there are standardized measures to  
49  
50 identify it. Furthermore, it is a facet of wellbeing that can be influenced by organizational  
51  
52 factors and is under the influence of the healthcare system.<sup>16,21,22</sup> Thus, this systematic review of  
53  
54  
55  
56  
57  
58  
59

1  
2  
3 the literature extends our knowledge about the dimensions of quality of care that reflect  
4  
5 physician interactions with patients and a dimension of wellbeing that is affected by the work  
6  
7 environment.  
8  
9

## 10 11 12 **METHODS**

13  
14 A systematic review of the literature was reported following the *Preferred Reporting*  
15 *Items for Systematic Reviews and Meta-Analyses* (PRISMA) guidelines.<sup>23</sup> Ethics board review  
16  
17 was not sought because this review relied solely on publicly available sources of information.  
18  
19

### 20 21 **Information Sources**

22  
23 Six databases were searched: (1) *Medline Current* (index of biomedical research and  
24  
25 clinical sciences journal articles); (2) *Medline In-Process* (index of biomedical research and  
26  
27 clinical sciences journal articles awaiting to be indexed into *Medline Current*); (3) *Medline Epub*  
28  
29 *Ahead of Print* (index of articles that appear on publisher websites in advance of the journal  
30  
31 release) (4) *PsycINFO* (an index of journal articles, books, chapters, and dissertations in  
32  
33 psychology, social sciences, behavioral sciences, and health sciences); (5) *Embase* (index of  
34  
35 biomedical research, and abstracts from biomedical, drug and medical device conferences); and  
36  
37 (6) *Web of Science* (index of journal articles, editorially selected books and conference  
38  
39 proceedings in life sciences and biomedical research).  
40  
41  
42  
43

### 44 45 **Search Strategy**

46  
47 Collaborating with the professional health science librarian (SB) member of this research  
48  
49 team, search strategies were developed and tailored for each database following the Peer Review  
50  
51 of Electronic Search Strategies (PRESS) guidelines<sup>24</sup> (Supplementary File 1: Search terms used  
52  
53 in search strategy). Because recommended guidelines were used for this review's search  
54  
55  
56  
57  
58  
59

1  
2  
3 strategies, the search strategy that we used is also a contribution to the literature. As this  
4  
5 literature grows, the strategy can be used in future searches on the topic. The searches were  
6  
7 conducted in February 2017. The OVID platform was used to search *Medline Current*, *Medline*  
8  
9 *In-Process*, *Medline Epub Ahead of Print*, *PsycINFO*, and *Embase*. *Web of Science* was  
10  
11 searched using the Thomson Reuters search interface. The search period covered January 2002 –  
12  
13 February 2017; all searches were limited to English language journals. The time frame was  
14  
15 chosen to represent the current healthcare environments in which physicians are practicing. For  
16  
17 example, the year 2002 was the year after the Institute of Medicine’s report<sup>14</sup> on the quality of  
18  
19 healthcare that discussed the six dimensions of quality of care. By beginning in 2002, we have  
20  
21 allowed for a one year lag after publication of this report during which healthcare settings and  
22  
23 researchers could have incorporated the Institute of Medicine’s quality of healthcare framework  
24  
25 into their work.  
26  
27  
28  
29

30  
31 Our searches sought to identify articles about practicing physicians regardless of  
32  
33 specialty working in civilian settings (i.e., non-military settings). In this review, the physician  
34  
35 search included: allergists, anesthesiologists, cardiologists, clinical pharmacologists, clinical  
36  
37 toxicologists, dermatologists, doctors, endocrinologists, gastroenterologists, gynecologists,  
38  
39 hematologists, immunologists, medical biochemists, medical geneticists, medical  
40  
41 microbiologists, nephrologists, neurologists, neuropathologists, neuroradiologists, occupational  
42  
43 physicians, oncologists, ophthalmologists, pathologists, pediatricians, physicians, psychiatrists,  
44  
45 radiologists, rheumatologists, surgeons, and urologists. The search strategy did not seek to  
46  
47 exclude residents and medical students. Rather, a broad search strategy was employed to  
48  
49 increase the likelihood that all studies on physician burnout would be found. The reference lists  
50  
51 of all accepted full-text articles were hand searched.  
52  
53  
54  
55  
56  
57  
58  
59  
60

## Screening process

Relevant articles were identified using a multi-phase screening process that involved reviewer pairs using the inclusion and exclusion criteria for this review. In the first step, titles were screened. Next, abstracts of the articles that remained after the first step were screened. The final step of the process involved screening the full text of all articles that passed the first and second phases. In the full text screening, papers for which there was insufficient information in the title and abstract to determine relevancy were also included. Two pairs of reviewers (CSD and LT, CSD and DL) independently completed the multi-phase screening process. The inter-rater reliability corrected for chance<sup>25</sup> between CSD & LT and CSD & DL was  $\kappa = 0.96$  and  $\kappa = 0.98$ , respectively. Before moving onto each stage, disagreements were discussed until consensus was reached.

For this review, burnout was defined as a syndrome of emotional exhaustion, cynicism (depersonalization) and reduced feelings of personal accomplishment related to work.<sup>6</sup> Quality of care related to acceptability was identified with measures reflecting physician-patient interactions such as patient satisfaction, perceived quality of care, physician communication with patients, and physician attitudes towards patients. In addition, safety was identified by measures that reflected risks or harm to patients such as medical errors.

Study inclusion criteria were:

1. Studies reported quality of care outcomes related to acceptability and/or safety
2. The sample population was comprised of practicing physicians regardless of specialty who worked in civilian settings. That is, the results were reported such that the practicing physician (as opposed to resident) outcomes were reported separately.
3. Burnout was assessed based on a psychometrically validated measure
4. Paper reports original research

1  
2  
3 Exclusion criteria were:  
4

- 5 1. The study sample was comprised only of residents and medical students
- 6 2. The study did not examine the relationship between burnout and one of the two  
7 quality of care dimensions
- 8 3. Burnout was not assessed based on a validated measure
- 9 4. The paper was a review article or commentary

### 14 **Risk of Bias Assessment**

15  
16 All included articles were assessed for risk of bias by both pairs of reviewers (CSD &  
17 LT, and CSD & DL). Disagreements between the pairs of reviewers were discussed until  
18 consensus was reached.  
19  
20

21  
22  
23 To assess the risk of bias in observational studies, Sanderson et al.<sup>26</sup> recommend the use  
24 of a transparent checklist that concentrates on the “few, principal, and potential sources of bias in  
25 a study’s findings”. They assert that the fundamental domains should include: (1) the  
26 appropriate selection of participants, (2) appropriate measurement of variables, and (3)  
27 appropriate control of confounding. In accordance with their recommendations and the  
28 Strengthening of Observational Studies in Epidemiology (STROBE) criteria,<sup>27</sup> a 9-item risk of  
29 bias checklist with the following criteria adapted from Lagerveld et al.<sup>28</sup> was used:  
30  
31  
32  
33  
34  
35  
36  
37  
38

- 39 1. Study population is well described to facilitate understanding about the  
40 generalizability of the results based on the study sample (e.g., age, sex, location of  
41 the study, physician specialty, practice location)
  - 42 2. Data collection methods that address the risk of bias are described
  - 43 3. Participation/response rate was at least 50% on average
  - 44 4. The psychometric properties of the quality of care outcome measure have been  
45 tested
  - 46 5. Statistical method was appropriate for the question being answered
  - 47 6. Statistical significance of associations were tested and reported
  - 48 7. Study controlled for at least one confounder such as sex or age in the analyses
- 49  
50  
51  
52  
53  
54  
55  
56  
57  
58  
59  
60

8. Physician matched with patient
9. Longitudinal data was used

Each item was scored “1” if the criterion had been met. Each article could achieve a maximum score of 9. Based on their total score, articles were categorized either as low (8-9 points), moderate (5-7 points), or high risk of bias (1-4 points).

## RESULTS

### Article Inclusion and Exclusion Results

The electronic literature search resulted in the identification of 4,114 unique citations (Figure 1). Based on the title review, 4,020 citations were excluded; this left 94 articles for abstract review. During the abstract review, another 28 citations were excluded; this left 66 articles for full-text review. Reasons for article exclusions at full text review were: (1) not a relevant outcome (n = 10), (2) sample not comprised of physicians/cannot distinguish physicians as a group from other clinicians (n = 15), (3) it was not original research (n = 20), (4) burnout not measured with a validated instrument (n = 1), and (5) not published in a peer-reviewed journal (n = 8). After the full-text review, 12 articles remained and their reference lists were hand searched for relevant studies. The hand search identified six additional citations; all six were excluded at full-text review.

-----  
Insert Figure 1  
-----

### Risk of Bias Assessment Results

Our assessment indicated 10 of the 12 studies were of moderate risk of bias; two were of high risk of bias. Figure 2 illustrates the limitations of these studies. Two studies comprehensively<sup>5,29</sup> described the study population from which the study sample was drawn.



1  
2  
3 Two studies used longitudinal data.<sup>29,30</sup> Other limitations involved not reporting the response  
4 rate<sup>31-34</sup> and not controlling for possible confounding factors in the statistical analyses.<sup>34,35</sup> There  
5 was also variability in the use of validated outcome measures; only three studies used validated  
6 instruments to measure their outcomes.<sup>31,33,35</sup> All included studies employed appropriate  
7 statistical tests. All but one<sup>29</sup> reported the results of the statistical testing (Supplementary File 2:  
8 Risk of Bias Assessment Checklist).  
9  
10  
11  
12  
13  
14  
15

16  
17 -----  
18 Insert Figure 2  
19 -----  
20

### 21 **Overview of the Studies**

22  
23 Of the 12 studies that met the inclusion criteria (Table 1), four were conducted in the US,  
24 two in Germany, one each in Greece, Israel, Japan, China, and Taiwan. There was one multi-  
25 national study based on data from Italy, Spain, and Portugal.  
26  
27  
28  
29  
30  
31  
32  
33  
34  
35  
36  
37  
38  
39  
40  
41  
42  
43  
44  
45  
46  
47  
48  
49  
50  
51  
52  
53  
54  
55  
56  
57  
58  
59  
60

Table 1. Description of the Studies

| Author(s)                                             | Study Population                                                                                                                                                                                                                                                              | Description of Sample                                                                                                                                                                                                                                                                         | Burnout Measure                                                                                                                                                                              | Quality of Care Measure                                                                                                                                                                                                                                                                                                                                                                                                                                                                                                                                         |
|-------------------------------------------------------|-------------------------------------------------------------------------------------------------------------------------------------------------------------------------------------------------------------------------------------------------------------------------------|-----------------------------------------------------------------------------------------------------------------------------------------------------------------------------------------------------------------------------------------------------------------------------------------------|----------------------------------------------------------------------------------------------------------------------------------------------------------------------------------------------|-----------------------------------------------------------------------------------------------------------------------------------------------------------------------------------------------------------------------------------------------------------------------------------------------------------------------------------------------------------------------------------------------------------------------------------------------------------------------------------------------------------------------------------------------------------------|
| Anagnostopoulos et al. (2012) <sup>31</sup><br>Greece | Physicians working in three large primary health care centers.<br><br>Patients of participating physicians. Patients selected through systematic random sampling – 1:3 consecutive patients.<br><br>Physician response rate: 85.8%<br><br>Patient response rate: Not reported | n = 30 physicians<br><br>≤ 10 years practicing: 53%<br><br>Specialties:<br>General practitioners: 63%<br>Pathologists/internists: 23.3%<br><br>Male: n = 17<br>Female: n = 13<br>> 50 yrs: 43%<br>26-50 yrs: 40%<br><br>n = 300 patients<br>Male: 46%<br>Female: 54%<br>Mean age: 54 ± 15 yrs | Greek translation of the 22-item Maslach Burnout Inventory-Human Services Survey                                                                                                             | Patient report:<br>Patient satisfaction assessed using 18-item Consultation Satisfaction Questionnaire. <sup>36</sup> 5-point Likert scale from 1 = “strongly agree” to 5 = “strongly disagree”.<br>Satisfaction sub-scales: (1) General, (2) Perceived length of consultation, (3) Depth of relationship, (4) Professional care provided<br>Overall satisfaction: sum of all items (max score = 90)<br><br>Scale was translated into Greek using back-translation and pilot testing.<br><br>English version's psychometric properties tested. <sup>36,37</sup> |
| Halbesleben and Rathert (2008) <sup>32</sup><br>USA   | Attending physicians of university students who had been hospitalized in past year.<br><br>Student response rate: Not reported                                                                                                                                                | n = 178 physicians<br><br>Yrs practicing: Not reported<br><br>Specialties: Not reported<br><br>Male: n = 84<br>Female: n = 94<br>Mean age = 46 ± 13 yrs<br><br>n = 178 patients<br>Male: n = 98<br>Female: n = 80<br>Mean age: 23 ± 5 yrs                                                     | 22-item Maslach Burnout Inventory-Human Services Survey modified to apply to patients rather than general care recipients                                                                    | Patient report:<br>Patient satisfaction assessed using 22-item SERVQUAL. <sup>38</sup><br>7-point Likert scale from 1 = “strongly disagree” to 7 = “strong agree”.<br><br>Psychometric properties tested but subsequent study suggested need for further exploration regarding its validity. <sup>39</sup>                                                                                                                                                                                                                                                      |
| Hayashino et al. (2012) <sup>30</sup><br>Japan        | Members of a panel of 6,459 hospital-based physicians recruited through hospital lists and scientific meetings. A randomly selected sub-sample of 1,198 were invited to participate.<br><br>Response rate: 70%                                                                | n = 836 physicians<br><br>Yrs practicing: Not reported<br><br>Male: 92%<br>Female: 8%<br><br>28-39 yrs: 23%<br>40-49 yrs: 47%<br>50-59 yrs: 26%<br>60-81 yrs: 4%                                                                                                                              | 17-item Maslach Burnout Inventory developed for Japanese healthcare professionals based on the MBI-Human Services Survey<br><br>Used burnout thresholds:<br>EE: ≥ 21<br>DP: ≥ 18<br>PA: ≥ 16 | Physician report:<br>Perceived medical errors assessed with questions: “Are you concerned that you have made any major medical mistakes in the last year?” IF “yes”, asked about number of medical errors that concerned respondent.<br><br>Psychometric properties not tested.                                                                                                                                                                                                                                                                                 |

| Author(s)                                             | Study Population                                                                                                                                                                                                                                                                                                   | Description of Sample                                                                                                                                                                                                                                                                                         | Burnout Measure                                                                                                                                                                                                                                                                                                                                                                                                                                                                                                                                            | Quality of Care Measure                                                                                                                                                                                                                                                                                                                                                                                                                                                                                                                                             |
|-------------------------------------------------------|--------------------------------------------------------------------------------------------------------------------------------------------------------------------------------------------------------------------------------------------------------------------------------------------------------------------|---------------------------------------------------------------------------------------------------------------------------------------------------------------------------------------------------------------------------------------------------------------------------------------------------------------|------------------------------------------------------------------------------------------------------------------------------------------------------------------------------------------------------------------------------------------------------------------------------------------------------------------------------------------------------------------------------------------------------------------------------------------------------------------------------------------------------------------------------------------------------------|---------------------------------------------------------------------------------------------------------------------------------------------------------------------------------------------------------------------------------------------------------------------------------------------------------------------------------------------------------------------------------------------------------------------------------------------------------------------------------------------------------------------------------------------------------------------|
| <p>Klein et al. (2010)<sup>5</sup></p> <p>Germany</p> | <p>Physicians in surgery working in &gt; 100 beds general hospitals with a general surgical and/or gynecological ward.</p> <p>Stratified probability sample based on hospital beds.</p> <p>Response rates:<br/>Hospital level: 53%<br/>Physician level: 36%<br/>Physicians in participating hospitals: 65%</p>     | <p>n = 1,311 physicians</p> <p>Mean yrs practicing: 11 yrs</p> <p>Male: 60%<br/>Female: 40%</p> <p>Mean age = 45 ± 8.5 yrs</p>                                                                                                                                                                                | <p>Copenhagen Burnout Inventory (CBI). Three scales assessing personal, client, and work burnout.</p> <p>This study focused on personal burnout (i.e., degree of physical and psychological fatigue and exhaustion).</p>                                                                                                                                                                                                                                                                                                                                   | <p>Physician report:<br/>Perceived quality of care assessed using short version of Chirurgisches Qualitätssiegel. Created three sub-scales:<br/>(1) psychosocial care,<br/>(2) diagnosis/therapy,<br/>(3) quality assurance. 5-point Likert scale from 1 = "very good" to 5 = "bad".</p> <p>Two questions about frequency of diagnostic and therapeutic errors: "I have made mistakes in diagnosis." and "I have made mistakes in treatment." 4-point Likert scale ("never" to "often").</p> <p>Psychometric properties not tested for either set of questions.</p> |
| <p>Rabatin et al. (2016)<sup>29</sup></p> <p>USA</p>  | <p>Primary care physicians in New York City, Chicago, and rural and urban Wisconsin</p> <p>Recruited 1-6 patients/physician with diabetes, hypertension or congestive heart failure</p> <p>Response rate:<br/>Physicians: 59.6%<br/>Nonparticipants did not differ from participants in specialty, age, or sex</p> | <p>n = 119 practices<br/>n = 449 physicians<br/>n = 1,419 patient charts</p> <p>Physician characteristics:<br/>Male: n = 235<br/>Female: n = 187</p> <p>Mean age: 43 ± 10yrs</p> <p>Specialties:<br/>Family Medicine: 47%<br/>General Internal Medicine: 50%</p> <p>Patient characteristics: Not reported</p> | <p>Single item measure: "Using your own definition of burnout... (a) I have no symptoms of burnout; (b) Occasionally I am under stress... but I don't feel burned out; (c) I am definitely burning out and have one or more symptoms of burnout, such as physical and emotional exhaustion; (d) The symptoms of burnout that I'm experiencing won't go away...; (e) I feel completely burned out and often wonder if I can go on..."</p> <p>The question correlates with the Emotional Exhaustion dimension of Maslach Burnout Inventory.<sup>40</sup></p> | <p>Patient chart:</p> <p>Chart audit using a standardized template to retrospectively assess over 18-months for guideline adherence, responsiveness to "recurrent abnormalities" and missed drug interactions.</p> <p>Reliability not reported.</p>                                                                                                                                                                                                                                                                                                                 |

| Author(s)                                                 | Study Population                                                                                                                                                                                                                                                         | Description of Sample                                                                                                                                                                                                                                                                                                                                                           | Burnout Measure                                                                                                                                                                                                                                                                          | Quality of Care Measure                                                                                                                                                                                                                                                                                                                                                                                                                                                                                    |
|-----------------------------------------------------------|--------------------------------------------------------------------------------------------------------------------------------------------------------------------------------------------------------------------------------------------------------------------------|---------------------------------------------------------------------------------------------------------------------------------------------------------------------------------------------------------------------------------------------------------------------------------------------------------------------------------------------------------------------------------|------------------------------------------------------------------------------------------------------------------------------------------------------------------------------------------------------------------------------------------------------------------------------------------|------------------------------------------------------------------------------------------------------------------------------------------------------------------------------------------------------------------------------------------------------------------------------------------------------------------------------------------------------------------------------------------------------------------------------------------------------------------------------------------------------------|
| <p>Ratanawongsa et al. (2008)<sup>33</sup></p> <p>USA</p> | <p>Physicians from 15 urban community-based clinics who provided primary care to adult patient enrolled in a randomized controlled trial for hypertensive minority patients.</p> <p>Response rate: Not reported</p>                                                      | <p>n = 40 physicians</p> <p>Mean years of practice: 11 ± 7.7 yrs</p> <p>Male: 47%<br/>Female: 53%</p> <p>Mean age: 42 ± 8.7 yrs</p> <p>Specialties:<br/>Internal Medicine: 83%<br/>Family Practice: 15%<br/>General Practice: 2%</p> <p>n = 235 patients</p> <p>Male: 34%<br/>Female: 66%<br/>Mean age: 59 ± 13.2 yrs</p>                                                       | <p>A 6-item scale derived from the Maslach Burnout Inventory that captures the domains of EE and PA. Five point Likert scale from 1 = "strongly agree" to 3 = "neutral" to 5 = "strongly disagree".</p> <p>Based on terciles, burnout scores were categorized as low, average, high.</p> | <p>Physician report: Physicians completed "brief questionnaires indicating the degree to which they knew the patient, their attitudes toward the patient in general, and their attitudes regarding the visit".</p> <p>Audiotaped encounters analyzed for rapport-building communication behaviors using the Roter Interaction Analysis System. Four types of rapport identified: (1) Positive, (2) Negative, (3) Emotional, (4) Social</p> <p>Reliability and predictive validity tested.<sup>41</sup></p> |
| <p>Shanafelt et al. (2010)<sup>42</sup></p> <p>USA</p>    | <p>American surgeons who were members of the American College of Surgeons who permitted email correspondence.</p> <p>Response rate: 32%</p>                                                                                                                              | <p>n = 7,905 physicians</p> <p>Specialties:<br/>General: 41%<br/>Cardiothoracic: 6%<br/>Colorectal: 4%<br/>Otolaryngology: 5%<br/>Obstetrics/gynecology: 1%<br/>Oncologic: 5%<br/>Pediatric: 2%<br/>Plastic: 4%<br/>Transplant: 2%<br/>Trauma: 4%<br/>Urologic: 4%<br/>Vascular: 6%<br/>Other: 6%</p> <p>Male: 87%<br/>Female: 13%</p> <p>Median age (IQR): 51 yrs (43, 59)</p> | <p>22-item Maslach Burnout Inventory-Human Services Survey</p>                                                                                                                                                                                                                           | <p>Physician report:</p> <p>Response to: "Are you concerned you have made any major medical error in the last 3 months?"</p> <p>Psychometric properties not tested.</p>                                                                                                                                                                                                                                                                                                                                    |
| <p>Shirom et al. (2006)<sup>43</sup></p> <p>Israel</p>    | <p>Physicians from 4 health plans specializing in either: ophthalmology, dermatology, otolaryngology, gynecology (community-based), general surgery, cardiology (hospital-based). 50% random probability sample drawn from each specialty.</p> <p>Response rate: 63%</p> | <p>n = 890 physicians</p> <p>Male: 80%<br/>Female: 20%</p> <p>Median age: 52 yrs</p>                                                                                                                                                                                                                                                                                            | <p>12-items from the Shirom-Melamed Burnout Measure with 3 sub-scales: (1) physical fatigue, (2) cognitive weariness, (3) emotional exhaustion</p>                                                                                                                                       | <p>Physician report:</p> <p>Physicians completed a 15-item version of the modified SERVQUAL. 5-point Likert scale from 1 = "to a very small extent" to 5 = "to a very large extent".</p> <p>Psychometric properties of the modified version not tested.</p>                                                                                                                                                                                                                                                |

| Author(s)                                                     | Study Population                                                                                                                                                                                                                                                                                                                                          | Description of Sample                                                                                                                                                                                                                                                                                                                                                                            | Burnout Measure                                                                                                                                                                                                    | Quality of Care Measure                                                                                                                                                                                                                                                                                                                                                                                                           |
|---------------------------------------------------------------|-----------------------------------------------------------------------------------------------------------------------------------------------------------------------------------------------------------------------------------------------------------------------------------------------------------------------------------------------------------|--------------------------------------------------------------------------------------------------------------------------------------------------------------------------------------------------------------------------------------------------------------------------------------------------------------------------------------------------------------------------------------------------|--------------------------------------------------------------------------------------------------------------------------------------------------------------------------------------------------------------------|-----------------------------------------------------------------------------------------------------------------------------------------------------------------------------------------------------------------------------------------------------------------------------------------------------------------------------------------------------------------------------------------------------------------------------------|
| Travado et al. (2005) <sup>34</sup><br>Italy, Spain, Portugal | Physicians recruited from cancer centers of three hospitals – two general hospitals with a cancer ward and one cancer hospital.<br>Convenience sample<br>Response rate: Not reported                                                                                                                                                                      | n = 125 physicians<br>Yrs of practice: 15 ± 9.4 yrs<br>Male: 47%<br>Female: 54%<br>Mean age: 42 ± 9.7 yrs                                                                                                                                                                                                                                                                                        | 22-item Maslach Burnout Inventory-Human Services Survey<br>Used Maslach and Jackson <sup>5</sup> cutoff scores for no/low burnout, intermediate, and high burnout.                                                 | Physician report:<br>Communication skills assessed using two scales: (1) Self-Confidence in Communications Skills (SCSS). 12-item scale rating ability to communicate and manage a series of clinical situations. (2) Expected Outcomes of Communication (EOC). 23-item scale assessing extent to which physician perceives result of communication is positive or negative.<br>Psychometric testing not completed. <sup>44</sup> |
| Weigl et al. (2015) <sup>45</sup><br>Germany                  | Physicians working in one academic children's hospital who were providing patient care.<br>Response rate: 74%                                                                                                                                                                                                                                             | n = 88 physicians<br>Yrs of practice: 8 ± 6.7 yrs<br>Male: 47%<br>Female: 53%<br>Mean age: 37 ± 8.6 yrs                                                                                                                                                                                                                                                                                          | Two sub-scales of the German version of the Maslach Burnout Inventory-D: Emotional Exhaustion and Depersonalization.<br>High burnout defined as Mean EE score > 3.5 and Mean DP > 2.5                              | Physician report:<br>2-item perceived quality of care measure: "My workload frequently leads to reduced quality of work" and "Adverse work conditions frequently lead to a loss of quality." 5-point Likert scale from 1 = "not at all" to 5 = "a very great extent".<br>Psychometric properties not tested for the two items taken from the German version of the MBI.                                                           |
| Wen et al. (2016) <sup>46</sup><br>China                      | Physicians practicing in one of 46 hospitals in 10 provinces<br>n = 12 tertiary hospitals<br>n = 9 secondary hospitals<br>n = 25 primary hospitals<br>In the secondary and tertiary hospitals, physicians were selected from ≥ 10 clinical departments with > 10 people in the age groups: < 30 yrs, 30-39 yrs, 40-49 yrs, ≥ 50 yrs<br>Response rate: 89% | n = 1,607 total physicians<br>n = 192 physicians from primary hospitals<br>n = 354 physicians from secondary hospitals<br>n = 991 physicians from tertiary hospitals<br><u>Primary hospital</u><br>Male: 54%<br>Female: 46%<br>Mean age: 37 ± 9.9 yrs<br>Education:<br>≤ high school: 17%<br>Some college: 47%<br>Bachelors' degree: 35%<br>≥ Master's degree: 1.0%<br><u>Secondary hospital</u> | Used 15-item Chinese version of the Maslach Burnout Inventory-General Survey<br>Respondents grouped into three categories:<br>(1) No burnout symptoms<br>(2) Some burnout symptoms<br>(3) Serious burnout symptoms | Physician report:<br>Physicians were asked if they had made any of the following medical errors: (1) patient was harmed, (2) medication error, (3) treatment delayed, (4) incomplete or incorrect item in the patient record.<br>Psychometric properties not tested.                                                                                                                                                              |

| Author(s)                                      | Study Population                                                                                                                                                 | Description of Sample                                                                                                                                                                                                                                                                                                                                                          | Burnout Measure                                 | Quality of Care Measure                                                                                                                                                                                                                                                                                                                                                                                                                    |
|------------------------------------------------|------------------------------------------------------------------------------------------------------------------------------------------------------------------|--------------------------------------------------------------------------------------------------------------------------------------------------------------------------------------------------------------------------------------------------------------------------------------------------------------------------------------------------------------------------------|-------------------------------------------------|--------------------------------------------------------------------------------------------------------------------------------------------------------------------------------------------------------------------------------------------------------------------------------------------------------------------------------------------------------------------------------------------------------------------------------------------|
|                                                |                                                                                                                                                                  | Male: 53%<br>Female: 47%<br><br>Mean age: 36 ± 9.4 yrs<br><br>Education:<br>≤ high school: 4%<br>Some college: 17%<br>Bachelors' degree: 73%<br>≥ Master's degree: 6%<br><br><u>Tertiary hospital</u><br>Male: 61%<br>Female: 39%<br><br>Mean age: 36 ± 8.0 yrs<br><br>Education:<br>≤ high school: 1%<br>Some college: 3%<br>Bachelors' degree: 46%<br>> Master's degree: 51% |                                                 |                                                                                                                                                                                                                                                                                                                                                                                                                                            |
| Weng et al. (2011) <sup>35</sup><br><br>Taiwan | Physicians working in two hospitals.<br><br>Patients of participating physicians.<br><br>Physician response rate: Not reported<br><br>Patient response rate: 78% | n = 110 internists<br><br>Male: 85%<br>Female: 15%<br><br>Mean age: 41 ± 6.9 yrs<br><br>n = 2,872 patients<br><br>Male: 59%<br>Female: 41%                                                                                                                                                                                                                                     | Maslach Burnout Inventory-Human Services Survey | Patient report:<br><br>Patient satisfaction assessed with two questions: "I am satisfied with the care provided by my doctor" and "I would recommend this doctor to my friends and family members".<br><br>Single item from the CSQ's <sup>36</sup> General Satisfaction sub-scale not validated for individual use.<br><br>Single item about recommendation was correlated with EUROPEP patient satisfaction questionnaire. <sup>47</sup> |

### Description of the Study Populations

Six of the studies focused on hospital-based physicians.<sup>5,30,34,35,45,46</sup> Among these studies, two focused on cancer<sup>34</sup> and children's<sup>45</sup> specialty hospitals. In addition, one of these studies recruited surgeons practicing either in general surgery or gynecological wards.<sup>5</sup> One of these studies<sup>46</sup> also included people practicing as physicians who did not have graduate educations.

1  
2  
3 The remaining five studies recruited physicians practicing in a variety of settings. Three  
4 studies sought physicians in primary health care centers;<sup>29,31,33</sup> they included physicians  
5 practicing in internal medicine, general practice, and family practice. One of the studies<sup>29</sup> that  
6 recruited primary care physicians focused on the quality of care only for patients with diabetes  
7 and/or hypertension.  
8  
9

10  
11  
12  
13  
14 Two studies did not specify the setting.<sup>32,42</sup> However, of these two, one focused on  
15 surgeons.<sup>42</sup> Finally, one study used four health plans to recruit and contained a mixture of  
16 community and hospital physicians<sup>43</sup> which included physicians specializing in ophthalmology,  
17 dermatology, otolaryngology, community-based gynecology, general surgery, and hospital-based  
18 cardiology.  
19  
20  
21  
22  
23  
24  
25

## 26 Measuring Burnout

27  
28 In nine of the 12 studies, burnout was measured using either the 22-item Maslach  
29 Burnout Inventory (MBI),<sup>6</sup> translated version of the MBI-GS,<sup>46</sup> translated version of the MBI-  
30 HS<sup>30,31</sup> or selected MBI sub-scales.<sup>30-35,42,45,46</sup> The complete 22-item MBI measures three  
31 dimensions of burnout: Emotional Exhaustion, Depersonalization and Personal Accomplishment.  
32 It is one of the most widely used measures of burnout in the scientific literature.<sup>48,49</sup> One study<sup>29</sup>  
33 used a single item measure for burnout that correlates with the Emotional Exhaustion sub-scale  
34 of the MBI.<sup>40</sup>  
35  
36  
37  
38  
39  
40  
41  
42  
43

44 The two remaining studies used the Copenhagen Burnout Inventory (CBI)<sup>48</sup> and the  
45 Shirom-Melamed Burnout Measure (SMBM).<sup>49,50</sup> The CBI is a 19-item scale comprised of three  
46 sub-scales that assess personal burnout, work-related burnout, and client-related burnout.<sup>48</sup> It has  
47 been shown to be correlated with mental and general health as well as job satisfaction.<sup>48</sup> The  
48 SMBM is a 22-item measure with three sub-scales that assess physical fatigue, emotional  
49  
50  
51  
52  
53  
54  
55  
56  
57  
58  
59  
60



1  
2  
3 exhaustion, and cognitive weariness.<sup>49</sup> The psychometric properties of these scales continue to  
4  
5 be explored.<sup>49,51,52</sup>  
6

## 7 Measuring Quality of Care related to Acceptability and Patient Safety

8  
9  
10 Four types of quality of care measures related to acceptability and safety were used in  
11  
12 these studies. In terms of patient safety, medical errors were measured. Acceptability related  
13  
14 measures included patient satisfaction, perceived general quality of care, and physician  
15  
16 communication/attitudes.  
17

### 18 *Patient Safety Measures: Medical errors*

19  
20  
21 Patient safety was examined with medical errors. This outcome was assessed in five  
22  
23 studies.<sup>5,29,30,42,46</sup> Wen et al.<sup>46</sup> asked respondents whether they had made any medical errors  
24  
25 including one that resulted in a patient being harmed, a medication error, delay in treatment, or  
26  
27 incomplete or incorrect item being added to the patient record. Hayashino et al.<sup>30</sup> and Shanafelt  
28  
29 et al.<sup>42</sup> used similar questions about whether the respondent made major medical errors.  
30  
31  
32 However, the studies differed in the time frame that the respondent was asked to consider.  
33  
34 Hayashino et al.<sup>30</sup> asked about the past year while Shanafelt et al.<sup>42</sup> inquired about the past three  
35  
36 months. In contrast to these studies, Klein et al.<sup>5</sup> asked about frequency of diagnostic mistakes  
37  
38 and treatment without specifying a time frame. The studies differ in the types of errors that they  
39  
40 asked about (i.e., *major* errors rather than *any* errors). In addition, they depend on recall and  
41  
42 self-report. Shanafelt et al.<sup>42</sup> note that studies have used this type of question to gather  
43  
44 information about medical errors. However, there are also studies that have found that  
45  
46 physicians under-report medical errors.<sup>53</sup> Furthermore, there is evidence that physicians have a  
47  
48 limited ability to self-assess their practice patterns.<sup>54</sup>  
49  
50  
51  
52

53  
54 In addition to questions about frequency of diagnostic mistakes and treatment, Klein et  
55  
56  
57  
58  
59  
60



1  
2  
3 al.<sup>5</sup> included a questionnaire based on the Canadian Physician Achievement Review to evaluate  
4 physician self-perceived quality of psychosocial care, diagnosis/therapy, and quality assurance.<sup>55</sup>  
5  
6 However, the authors note that additional work regarding its validity is warranted.<sup>5</sup>  
7  
8  
9

10 There was only one study that did not rely on self-report to gather information about  
11 medical errors. Rabatin et al.<sup>29</sup> used a chart audit to assess medical errors characterized by  
12 adherence to guidelines, responsiveness to “recurrent abnormalities” and missed drug  
13 interactions.  
14  
15  
16  
17  
18

### 19 *Acceptability Measures: Patient satisfaction/Perceived Quality of Care*

20  
21 With regard to acceptability measures, patient satisfaction was assessed in four  
22 studies.<sup>31,32,35,43</sup> In two of these studies, the SERVQUAL was used to measure patient  
23 satisfaction/quality of care.<sup>32,43</sup> The SERVQUAL was developed to measure service quality  
24 along five dimensions: (1) tangibles (i.e., physical facilities), (2) reliability (i.e., performs  
25 dependably and accurately), (3) responsiveness (i.e., willingness to help), (4) assurance (i.e.,  
26 ability to inspire trust), and (5) empathy (i.e., caring).<sup>56</sup> Halbesleben and Rathert<sup>32</sup> used a  
27 healthcare specific version of the SERVQUAL. The psychometric properties of the scale were  
28 examined.<sup>38</sup> However, Asubonteng et al.<sup>39</sup> have raised questions about the strength of the scale’s  
29 psychometric properties.  
30  
31  
32  
33  
34  
35  
36  
37  
38  
39  
40  
41

42 Shirom and colleagues<sup>43</sup> adapted the SERVQUAL by eliminating seven items and  
43 revising the language for physicians to rate their own quality of care using the remaining 15  
44 items. The validity of this modified measure was not examined.  
45  
46  
47  
48

49 Weigl et al.<sup>45</sup> looked at physician-perceived quality of care by asking physicians to rate  
50 two statements on a 5-point scale, “My workload frequently leads to reduced quality of work,”  
51 and “Adverse work conditions frequently lead to a loss of quality.” The authors reference the  
52  
53  
54  
55  
56  
57  
58  
59  
60

1  
2  
3 German version of the MBI as the source for these questions. However, they do not provide  
4  
5 information about the psychometric properties of the individual use of these items.  
6

7  
8 One study<sup>31</sup> used the Consultation Satisfaction Questionnaire (CSQ) scale that was  
9  
10 created and validated to assess patient satisfaction with general practitioners.<sup>36</sup> It is comprised of  
11  
12 18 items and measures satisfaction along four dimensions: general satisfaction, professional care,  
13  
14 depth of relationship, and perceived time.  
15

16  
17 Finally, in their study, Weng et al.<sup>35</sup> used two questions to indicate patient satisfaction, “I  
18  
19 am satisfied with the care provided by my doctor,” and “I would recommend this doctor to my  
20  
21 friends and family.” The first of Weng et al.’s<sup>35</sup> question is similar to one of the CSQ’s<sup>36</sup> general  
22  
23 satisfaction items, “I am totally satisfied with my visit to the doctor.” However, the use of this  
24  
25 single-item has not been validated. A version of the second question has been used to measure  
26  
27 satisfaction and was correlated with the EUROPEP patient satisfaction questionnaire.<sup>47</sup>  
28  
29

### 30 31 *Acceptability Measures: Communication/Attitudes*

32  
33 Two studies focused on physician communication/attitudes.<sup>33,34</sup> Using audiotapes of  
34  
35 physician/patient interactions, Ratanawongsa et al.<sup>33</sup> assessed the interactions by employing the  
36  
37 Roter Interaction Analysis System (RIAS).<sup>57</sup> RIAS is a validated method of categorizing these  
38  
39 interactions into three categories related either to content, affection, or process.<sup>58</sup> There is  
40  
41 evidence that there is an association between the content and the socioemotional nature of the  
42  
43 interactions as categorized using the RIAS and patient satisfaction.<sup>57,58</sup>  
44  
45

46  
47 Travado et al.<sup>34</sup> examined the association between burnout and communication using two  
48  
49 measures: the Self-Confidence in Communications Skills (SCSS) and the Expected Outcomes of  
50  
51 Communication (EOC).<sup>44</sup> In their article, Parle and colleagues<sup>44</sup> note that exploration of the  
52  
53 psychometric properties of both measures were being conducted but were not yet completed.  
54  
55  
56  
57  
58  
59

1  
2  
3 Both were developed to understand the communication skills of physicians working with cancer  
4  
5 patients.  
6

#### 7 8 Study Outcomes: Burnout and Quality of Care 9

10 In this sub-section, we report about the quality of care outcomes from the included  
11 studies (Table 2). This review of outcomes begins by describing the findings regarding the  
12 association between burnout and patient safety (i.e., medical errors). It is followed by reporting  
13 of the acceptability outcomes as measured by patient satisfaction/perceived quality of care and  
14 physician communication/attitudes.  
15  
16  
17  
18  
19  
20

#### 21 *Outcomes: Burnout and Medical Errors* 22

23  
24 Table 2 contains the outcomes reported by the included papers. In terms of findings for  
25 the association between burnout and medical errors, there was a consistently significant  
26 relationship between burnout and medical errors among four papers focusing on this  
27 relationship.<sup>5,30,42,46</sup> Shanafelt et al.<sup>42</sup> reported significantly higher odds of a major medical error  
28 during the past three months among physicians with higher EE and DP but lower odds among  
29 physicians with higher PA. Hayashino et al.<sup>30</sup> also observed significant associations between a  
30 major medical error during the past 12 months and higher levels of EE and DP; however, the  
31 relationship with PA was not significant. Klein et al.<sup>5</sup> reported significant associations between  
32 high burnout and diagnostic error, therapeutic error, sub-optimal psychosocial care, sub-optimal  
33 diagnosis and treatment, and sub-optimal quality assurance. Wen et al.<sup>46</sup> found higher odds of  
34 medical errors among physicians with either some or serious burnout symptoms as opposed to no  
35 burnout symptoms.  
36  
37  
38  
39  
40  
41  
42  
43  
44  
45  
46  
47  
48  
49

50  
51 The one paper<sup>29</sup> that assessed errors based on chart audits did not find a significant  
52 relationship between burnout and medical errors. But, it should be noted that this study focused  
53  
54  
55  
56  
57  
58  
59  
60

on treatment for a sub-group of patients with chronic disorders that included diabetes and/or hypertension.

**Table 2. Patient Safety and Acceptability Related Quality of Care Outcomes**

| Author(s)                                             | Medical Errors (ME)                                                                                                                                                                                                                                                                                                                                                                                                                                                                                                                                                                                                                  | Patient Satisfaction (PS)/Quality of Care (QoC)                                                                                                                                                                                                                                                                                                                                                                                                                                                                                                                                 | Communication/Attitudes |
|-------------------------------------------------------|--------------------------------------------------------------------------------------------------------------------------------------------------------------------------------------------------------------------------------------------------------------------------------------------------------------------------------------------------------------------------------------------------------------------------------------------------------------------------------------------------------------------------------------------------------------------------------------------------------------------------------------|---------------------------------------------------------------------------------------------------------------------------------------------------------------------------------------------------------------------------------------------------------------------------------------------------------------------------------------------------------------------------------------------------------------------------------------------------------------------------------------------------------------------------------------------------------------------------------|-------------------------|
| Anagnostopoulos et al. (2012) <sup>31</sup><br>Greece |                                                                                                                                                                                                                                                                                                                                                                                                                                                                                                                                                                                                                                      | Correlation btwn Maslach Burnout Inventory (MBI) dimensions and PS:<br><ul style="list-style-type: none"> <li>• EE &amp; PS: <math>r = -0.64</math>, <math>p &lt; 0.01</math></li> <li>• DP &amp; PS: <math>r = -0.54</math>, <math>p &lt; 0.01</math></li> <li>• PA &amp; PS: <math>r = 0.26</math>, <math>p = 0.17</math></li> </ul> Results of mixed effect model with PS as outcome:<br><ul style="list-style-type: none"> <li>• Low EE associated with highest average PS</li> </ul> Comparison btwn moderate and high EE no significant difference in association with PS |                         |
| Halbesleben and Rathert (2008) <sup>32</sup><br>USA   |                                                                                                                                                                                                                                                                                                                                                                                                                                                                                                                                                                                                                                      | Correlation btwn MBI dimensions and PS:<br>DP & PS: $r = -0.16$ , $p < 0.05$                                                                                                                                                                                                                                                                                                                                                                                                                                                                                                    |                         |
| Hayashino et al. (2012) <sup>30</sup><br>Japan        | Association btwn MBI dimensions and any medical error:<br><ul style="list-style-type: none"> <li>• Significant differences among tertiles for EE (<math>p = 0.026</math>) &amp; DP (<math>p = 0.002</math>)</li> </ul> % with ME by burnout dimension tertile:<br>EE 1 <sup>st</sup> tertile: 27.9%<br>EE 2 <sup>nd</sup> tertile: 38.2%<br>EE 3 <sup>rd</sup> tertile: 33.9%<br><br>DP 1 <sup>st</sup> tertile: 35.0%<br>DP 2 <sup>nd</sup> tertile: 27.8%<br>DP 3 <sup>rd</sup> tertile: 37.2%<br><br><ul style="list-style-type: none"> <li>• No significant differences among tertiles for PA (<math>p = 0.67</math>)</li> </ul> |                                                                                                                                                                                                                                                                                                                                                                                                                                                                                                                                                                                 |                         |
| Klein et al. (2010) <sup>5</sup><br>Germany           | Adjusted* Odds Ratios (95% CI) for probability of error and high burnout score:<br><ul style="list-style-type: none"> <li>• Diagnostic error: 1.66 (1.26, 2.20)</li> <li>• Therapeutic error: 1.94 (1.39, 2.69)</li> </ul> *Adjusted for gender, occupational position, job experience                                                                                                                                                                                                                                                                                                                                               | Adjusted* Odds Ratios (95% CI) for probability of suboptimal care and high burnout score:<br><ul style="list-style-type: none"> <li>• Psychosocial care = 1.58 (1.19, 2.10)</li> <li>• Dx/Tx = 1.59 (1.17, 2.16)</li> <li>• Quality assurance = 1.45 (1.10, 1.90)</li> </ul> *Adjusted for gender, occupational position, job experience                                                                                                                                                                                                                                        |                         |
| Rabatin et al. (2016) <sup>29</sup><br>USA            | Statistics not reported<br><br>No statistically significant differences between physicians with burnout and without.                                                                                                                                                                                                                                                                                                                                                                                                                                                                                                                 |                                                                                                                                                                                                                                                                                                                                                                                                                                                                                                                                                                                 |                         |

| Author(s)                                                     | Medical Errors (ME)                                                                                                                                                                              | Patient Satisfaction (PS)/Quality of Care (QoC)                                                                                                                                                                                                                               | Communication/Attitudes                                                                                                                                                                                                                                                                                                                                                                                                                                                                    |
|---------------------------------------------------------------|--------------------------------------------------------------------------------------------------------------------------------------------------------------------------------------------------|-------------------------------------------------------------------------------------------------------------------------------------------------------------------------------------------------------------------------------------------------------------------------------|--------------------------------------------------------------------------------------------------------------------------------------------------------------------------------------------------------------------------------------------------------------------------------------------------------------------------------------------------------------------------------------------------------------------------------------------------------------------------------------------|
| Ratanawongsa et al. (2008) <sup>33</sup><br>USA               |                                                                                                                                                                                                  | Adjusted* Odds Ratios (95% CI) for probability of PS with high vs low burnout:<br>• PS = 0.44 (0.18, 1.08), p=0.07<br>*Adjusted for patient health insurance, visit length, physician gender, physician IMG status, interaction btwn IMG status and burnout                   | Odds Ratios (95% CI) for probability of negative rapport building with medium and high vs low burnout:<br>• Medium: 1.85 (1.31, 2.61), p=0.001<br>• High: 2.06 (1.58, 2.86), p<0.001<br>*Adjusted for patient health insurance, visit length, physician gender, physician IMG status, interaction btwn IMG status and burnout                                                                                                                                                              |
| Shanafelt et al. (2010) <sup>42</sup><br>USA                  | Odds Ratios (95% CI) for perceived medical error with MBI dimensions:<br>• EE = 1.048 (1.042, 1.055), p<0.0001<br>• DP = 1.109 (1.096, 1.122), p<0.0001<br>• PA = 0.965 (0.955, 0.975), p<0.0001 |                                                                                                                                                                                                                                                                               |                                                                                                                                                                                                                                                                                                                                                                                                                                                                                            |
| Shirom et al. (2006) <sup>43</sup><br>Israel                  |                                                                                                                                                                                                  | Structural equation model examining relationships of autonomy, burnout and QoC:<br>• Relationship btwn global burnout and QoC not significant ( $\beta = -0.12$ , p>0.05)<br>• EE exhaustion negatively related to QoC ( $\beta = -40$ , p<0.05)                              |                                                                                                                                                                                                                                                                                                                                                                                                                                                                                            |
| Travado et al. (2005) <sup>34</sup><br>Italy, Spain, Portugal |                                                                                                                                                                                                  |                                                                                                                                                                                                                                                                               | Correlations btwn MBI burnout dimensions and communication:<br><br>Self-Confidence in Communication Skills<br>• EE: r = -0.03, not significant<br>• DP: r = -0.08, not significant<br>• PA: r = 0.37, p<0.01<br><br>Negative Expected Outcomes of Communication<br>• EE: r = -0.21, p<0.05<br>• DP: r = -0.25, p<0.01<br>• PA: r = 0.28, p<0.01<br><br>Positive Expected Outcomes of Communication<br>• EE: r = 0.01, not significant<br>• DP: r = 0.34, p<0.01<br>• PA: r = -0.28, p<0.01 |
| Weigl et al. (2015) <sup>45</sup><br>Germany                  |                                                                                                                                                                                                  | Adjusted* Odds Ratios (95% CI) for probability of low QoC with MBI dimensions (Low vs High):<br>• EE = 0.75 (0.08, 1.42), p<0.05<br>• DP = 0.17 (-0.45, 0.80), not significant<br>*Adjusted for gender, professional tenure, clinical work environment, career stage/position |                                                                                                                                                                                                                                                                                                                                                                                                                                                                                            |

| Author(s)                                  | Medical Errors (ME)                                                                                                                                                                                                                                                                                                    | Patient Satisfaction (PS)/Quality of Care (QoC)                                                                                                                                                            | Communication/Attitudes |
|--------------------------------------------|------------------------------------------------------------------------------------------------------------------------------------------------------------------------------------------------------------------------------------------------------------------------------------------------------------------------|------------------------------------------------------------------------------------------------------------------------------------------------------------------------------------------------------------|-------------------------|
| Wen et al. (2016) <sup>46</sup><br>China   | Adjusted* Odds Ratios (95% CI) for probability of any medical error with no burnout symptoms group as reference:<br><ul style="list-style-type: none"> <li>• Some burnout symptoms: 1.46 (1.13, 1.89)</li> <li>• Serious burnout symptoms: 2.28 (1.63, 3.17)</li> </ul> *Adjusted for sex, workload, and hospital type |                                                                                                                                                                                                            |                         |
| Weng et al. (2011) <sup>35</sup><br>Taiwan |                                                                                                                                                                                                                                                                                                                        | Correlation btwn MBI burnout dimensions and PS:<br><ul style="list-style-type: none"> <li>• EE: not significant</li> <li>• DP: negative relationship (p&lt;0.01)</li> <li>• PA: not significant</li> </ul> |                         |

### *Outcomes: Burnout and Patient Satisfaction/Quality of Care*

Among the four studies that examined the relationship between burnout and patient satisfaction/quality of care, three observed a significant relationship between either burnout or at least one dimension of burnout.<sup>31-33,35</sup> The one study<sup>33</sup> that combined the MBI EE and PA dimensions to create a single burnout score did not find a significant relationship between the score and patient satisfaction. Because it used only two sub-scales and one of them was PA rather than DP, it is not clear regarding the extent to which their choice of sub-scales was consistent with the other measures of burnout.

Among the three studies that reported separate MBI dimensions, there seemed to be a consistent observation that high DP is significantly related to lower patient satisfaction.<sup>31,32,35</sup> However, the significance of the association between EE and patient satisfaction varied among studies; Anagnostopoulos et al.<sup>31</sup> reported a significant correlation but Weng et al.<sup>35</sup> did not.

At the same time, Shirom et al.<sup>43</sup> described a significantly negative relationship between high EE and physician perceived quality of care. Weigl and colleagues<sup>45</sup> also found a significant negative relationship with EE but did not find a significant relationship between DP and physician perceived quality of care.

### *Outcomes: Burnout and Communication/Attitudes*

Travado et al.<sup>34</sup> found a significantly positive relationship between PA and self-confidence in communication skills as well as with negative expected outcomes of communication. They also observed a significantly negative association between PA and positive expected outcomes of communication. In addition, Ratanawongsa et al.<sup>33</sup> reported a higher probability of negative rapport with medium and high burnout.

## **DISCUSSION**

This systematic literature review identified 12 studies of which 10 had a moderate risk of bias and two had a high risk of bias. The results of these physician burnout studies show that patient safety has been primarily measured by examining medical errors. The acceptability outcomes have been captured using two groups of indicators that measure patient satisfaction/perceived quality of care and physician communication/attitudes towards patients. The majority of these studies examined the relationship between burnout and acceptability. Among the acceptability-related quality of care outcomes, the focus has been on patient satisfaction/perceived quality of care.

The results of four of the five included studies that reported on the relationship between burnout and medical errors suggest there is evidence that burnout is associated with physician self-perceived medical errors and sub-optimal care. However, there is equivocal evidence that specific dimensions of burnout are related to the acceptability dimension of quality of care as measured by patient satisfaction, perceived quality of care, or physician communication/attitudes. Thus, the current body of evidence suggests there is moderate evidence for the association between burnout and safety aspects of healthcare whereas the evidence is weaker for the patient-related acceptability aspects of quality.

### Strengths and Limitations of Interpreting the Literature

One of the important questions raised by burnout studies in general is highlighted by Klein et al.'s<sup>5</sup> and Shirom et al.'s<sup>43</sup> use of non-MBI scales. Klein and colleagues<sup>5</sup> used the Copenhagen Burnout Inventory while Shirom et al.<sup>43</sup> used the Shirom-Melamed Burnout Measure. One of the criticisms that the separate developers of these two scales raise is that the MBI does not fully assess burnout.<sup>43,48</sup> Rather, both groups argue that fatigue and exhaustion are fundamental to the definition of burnout.<sup>43,48</sup> However, this emphasis on exhaustion may be reflected in the fact that EE is the most widely studied of the MBI dimensions.<sup>59</sup> This would argue for the assessment of this dimension in studies of burnout and the individual reporting of it.

Another limitation of these studies was the reliance on physician self-report data for the assessment of medical errors. The self-report could be influenced by a number of factors including recall bias and social desirability. There is a potential additional bias introduced if self-report is used for both the outcome and the problem.<sup>60</sup> The presence of burnout could also influence perceptions. For example, Fahrenkopf et al.<sup>61</sup> observed a discrepancy between the results of chart audits and physician self-report; those with higher burnout scores reported higher numbers of medical errors than the chart audits would suggest.

An alternative to self-report would be observational data. However, watching physicians while they practice could lead to a Hawthorne Effect. Another alternative would be to review medical records to identify errors. But, this relies on the accuracy of the records. Also, it is not clear what types of medical errors should be assessed – major errors leading to an adverse event or any medical error regardless of outcome? In their study, Fahrenkopf et al.<sup>61</sup> used a standardized method to abstract information from charts and trained reviewers to categorize the



1  
2  
3 errors into groups: (1) preventable adverse event, (2) non-preventable adverse event, (3) potential  
4 adverse event, and (4) error with little potential for harm. Further work could examine how  
5  
6 physicians define errors as well as the reliability of error self-report. In addition, to improve the  
7  
8 comparability of outcomes, future studies could incorporate and report severity of medical error  
9  
10 scores.  
11  
12  
13

14  
15 There was a diverse set of measures used in the studies that focused on patient  
16  
17 satisfaction and quality of care. They varied in what and how they measured the outcome. In  
18  
19 addition, the majority of the studies did not use validated outcome measures. For example,  
20  
21 perceived quality of care was assessed using a variety of measures that ranged from two items  
22  
23 for which the psychometric properties were not tested to a scale designed to assess service  
24  
25 quality on six dimensions. Thus, it is difficult to discern the extent to which the study results  
26  
27 could be attributed to the differences in the dimensions assessed. Further exploration along this  
28  
29 line of inquiry could be undertaken to understand the aspects of satisfaction and perceived  
30  
31 quality of care that are significantly associated with burnout.  
32  
33  
34

35  
36 An additional limitation of the existing body of literature is the reliance on cross-  
37  
38 sectional study designs. Cross-sectional design limits conclusions regarding causality. Cross-  
39  
40 sectional data does not distinguish the sequence of conditions. For example, did burnout cause  
41  
42 decreased quality of care? Or, did decreased quality of care cause burnout? At best, the cross-  
43  
44 sectional data used in these studies can only be used to determine that there is a relationship. At  
45  
46 that same time, there is evidence from studies that have used longitudinal data to examine  
47  
48 burnout and medical errors among residents that there is a causal relationship such that burnout  
49  
50 causes errors.<sup>62</sup> However, the longitudinal data that contributes to the strength of West et al.'s<sup>62</sup>  
51  
52 is potentially weakened by the self-reported medical errors.  
53  
54  
55  
56  
57  
58  
59  
60

1  
2  
3 Finally, only two studies<sup>5,29</sup> described the population from which the study sample was  
4 drawn. Thus, it is difficult to determine whether there was a difference between the study  
5 participants and non-participants. To aid in the interpretation of the results (i.e., the  
6 generalizability), it would be useful for future studies to report this type of information.  
7  
8  
9  
10  
11

### 12 **Strengths and Limitations of the Search Strategy**

14 Although six databases were used in the search, articles that did not appear in any of the  
15 databases would have been missed. To decrease the possibility of this occurring, we employed a  
16 broad scope in development of the search terms for each database and followed this with a hand  
17 search of included articles. Another potential limitation is the fact that the search focused on  
18 articles published in English-language journals. However, despite the English-language  
19 constraint, the identified studies originated in European, Middle Eastern, North American and  
20 Asian countries. This indicates that although the research was not conducted in countries where  
21 English is the first language, at least some of these researchers publish in English-language  
22 journals. Finally, there is also a potential limitation associated with focusing on published peer-  
23 reviewed articles. In doing so, we may be subject to publication bias.<sup>63</sup> At the same time, the  
24 quality of the gray literature has been questioned because it is not necessarily subject to critical  
25 assessment prior to being published.<sup>64</sup> As a result, unpublished studies may be of lower quality  
26 and have greater risk of bias in their study designs.  
27  
28  
29  
30  
31  
32  
33  
34  
35  
36  
37  
38  
39  
40  
41  
42  
43

### 44 **CONCLUSIONS**

46 The focus on quality related to direct care can highlight additional ways that physician  
47 burnout affects the healthcare system. These results contribute evidence about whether the  
48 effects of physician burnout are limited to physicians or whether consequences of physician  
49 burnout are more extensive. They also can help to inform decisions about how to improve  
50  
51  
52  
53  
54  
55  
56  
57  
58  
59  
60

1  
2  
3 patient care by addressing physician burnout. That is, decisions can be informed when  
4  
5 confronting a question of how to improve quality of patient care. There are a number of ways in  
6  
7 which this may be done through investment in capital such as new technologies. The results of  
8  
9 this systematic review suggest that an alternative investment could be in human resources as  
10  
11 represented by physician staff.  
12  
13

14  
15 The results of this systematic literature review suggest that there is moderate evidence  
16  
17 that burnout is associated with safety-related quality of care. Because of the variability in the  
18  
19 way patient acceptability-related quality of care was measured and the inconsistency in study  
20  
21 findings, the evidence supporting the relationship between burnout and patient acceptability-  
22  
23 related quality of care is less strong. Future research evaluating burnout interventions for  
24  
25 physicians could consider looking at safety-related quality of care to assess the effectiveness of  
26  
27 these interventions. Continued work looking at the relationship between dimensions of  
28  
29 acceptability-related quality of measures and burnout is warranted.  
30  
31

### 32 33 **DATA SHARING STATEMENT**

34  
35 All the published papers used in this manuscript are publicly available. There are no data  
36  
37 available.  
38

### 39 40 **FUNDING**

41  
42 This work was funded by an Arnold P. Gold Foundation Mapping the Landscape grant.  
43  
44 Any views expressed or errors are the sole responsibility of the authors.  
45

### 46 47 **COMPETING INTERESTS**

48  
49 The authors declare that they have no competing interests.  
50  
51  
52  
53  
54  
55  
56  
57  
58  
59

## CONTRIBUTORSHIP STATEMENT

CSD led the conception, design, data acquisition, analysis and interpretation of the data; she also led the writing of the overall manuscript. DL collaborated on the design, data acquisition and analysis; he contributed to the writing of the overall manuscript and led the writing of the Methods section. SB collaborated on the design and data acquisition and contributed to the writing of the manuscript. LT collaborated on the data acquisition and analysis. All authors read and approved the final manuscript. All authors are guarantors of the final manuscript.

## REFERENCES

1. Allegra CJ, Hall R, Yothers G. Prevalence of burnout in the u.s. Oncology community: results of a 2003 survey. *J Oncol Pract* 2005;1(4):140-147.
2. Arigoni F, Bovier PA, Sappino AP. Trend of burnout among Swiss doctors. *Swiss Med Wkly* 2010;140:w13070.
3. Elit L, Trim K, Mand-Bains IH, Sussman J, Grunfeld E. Job satisfaction, stress, and burnout among Canadian gynecologic oncologists. *Gynecol Oncol* 2004;94(1):134-139.
4. Embriaco N, Azoulay E, Barrau K, et al. High level of burnout in intensivists: prevalence and associated factors. *Am J Respir Crit Care Med* 2007;175(7):686-692.
5. Klein J, Grosse Frie K, Blum K, von dem Knesebeck O. Burnout and perceived quality of care among German clinicians in surgery. *Int J Qual Health Care* 2010;22(6):525-530.
6. Maslach C, Jackson SE. The measurement of experienced burnout. *Journal of Occupational Behaviour* 1981;2:99-113.
7. Maslach C, Schaufeli WB, Leiter MP. Job burnout. *Annu Rev Psychol* 2001;52:397-422.
8. Dewa CS, Jacobs P, Thanh NX, Loong D. An estimate of the cost of burnout on early retirement and reduction in clinical hours of practicing physicians in Canada. *BMC Health Serv Res* 2014;14:254.
9. Sharma A, Sharp DM, Walker LG, Monson JR. Stress and burnout in colorectal and vascular surgical consultants working in the UK National Health Service. *Psychooncology* 2008;17(6):570-576.
10. Siu CFY, Yuen SK, Cheung A. Burnout among public doctors in Hong Kong: cross-sectional survey. *Hong Kong Medical Journal* 2012;18(3):186-192.
11. Asai M, Morita T, Akechi T, et al. Burnout and psychiatric morbidity among physicians engaged in end-of-life care for cancer patients: a cross-sectional nationwide survey in Japan. *Psychooncology* 2007;16(5):421-428.
12. Dewa CS, Loong D, Bonato S, Thanh NX, Jacobs P. How does burnout affect physician productivity? A systematic literature review. *BMC Health Serv Res* 2014;14:325.
13. World Health Organization. *Quality of care: A process for making strategic choices in health systems*. Geneva 2006.
14. Institute of Medicine. *Crossing the Quality Chasm: A New Health System for the 21st Century*. Washington, D.C. 2001.
15. Roberts JS. Chapter 1 Quality Health Care: Its Definitions and Evaluation. In: Huges EFX, ed. *Perspectives on Quality in American Health Care*. Washington, DC: McGraw-Hill, Inc.; 1988.
16. Wallace JE, Lemaire JB, Ghali WA. Physician wellness: a missing quality indicator. *Lancet* 2009;374(9702):1714-1721.
17. de Jong MA, Nieuwenhuijsen K, Sluiter JK. Common mental disorders related to incidents and behaviour in physicians. *Occup Med (Lond)* 2016;66(7):506-513.
18. Hall LH, Johnson J, Watt I, Tsipa A, O'Connor DB. Healthcare Staff Wellbeing, Burnout, and Patient Safety: A Systematic Review. *PLoS One* 2016;11(7):e0159015.
19. Williams ES, Skinner AC. Outcomes of physician job satisfaction: a narrative review, implications, and directions for future research. *Health Care Manage Rev* 2003;28(2):119-139.
20. Salyers MP, Bonfils KA, Luther L, et al. The Relationship Between Professional Burnout and Quality and Safety in Healthcare: A Meta-Analysis. *J Gen Intern Med* 2016.

21. Angerer P, Weigl M. Physicians' psychosocial work conditions and quality of care: A literature review. *Professions & Professionalism* 2015;5(1):1-14.
22. Lee RT, Seo B, Hladkyj S, Lovell BL, Schwartzmann L. Correlates of physician burnout across regions and specialties: a meta-analysis. *Hum Resour Health* 2013;11:48.
23. Moher D, Liberati A, Tetzlaff J, Altman DG, Group P. Preferred reporting items for systematic reviews and meta-analyses: the PRISMA statement. *PLoS Med* 2009;6(7):e1000097.
24. McGowan J, Sampson M, Salzwedel DM, Cogo E, Foerster V, Lefebvre C. PRESS Peer Review of Electronic Search Strategies: 2015 Guideline Statement. *J Clin Epidemiol* 2016;75:40-46.
25. Cohen J. A Coefficient of Agreement for Nominal Scales. *Educational and Psychological Measurement* 1960;20(1):37-46.
26. Sanderson S, Tatt ID, Higgins JP. Tools for assessing quality and susceptibility to bias in observational studies in epidemiology: a systematic review and annotated bibliography. *Int J Epidemiol* 2007;36(3):666-676.
27. von Elm E, Altman DG, Egger M, et al. The Strengthening the Reporting of Observational Studies in Epidemiology (STROBE) statement: guidelines for reporting observational studies. *PLoS Med* 2007;4(10):e296.
28. Lagerveld SE, Bultmann U, Franche RL, et al. Factors associated with work participation and work functioning in depressed workers: a systematic review. *Journal of occupational rehabilitation* 2010;20(3):275-292.
29. Rabatin J, Williams E, Baier Manwell L, Schwartz MD, Brown RL, Linzer M. Predictors and Outcomes of Burnout in Primary Care Physicians. *J Prim Care Community Health* 2016;7(1):41-43.
30. Hayashino Y, Utsugi-Ozaki M, Feldman MD, Fukuhara S. Hope modified the association between distress and incidence of self-perceived medical errors among practicing physicians: prospective cohort study. *PLoS One* 2012;7(4):e35585.
31. Anagnostopoulos F, Liolios E, Persefonis G, Slater J, Kafetsios K, Niakas D. Physician burnout and patient satisfaction with consultation in primary health care settings: evidence of relationships from a one-with-many design. *J Clin Psychol Med Settings* 2012;19(4):401-410.
32. Halbesleben JR, Rathert C. Linking physician burnout and patient outcomes: exploring the dyadic relationship between physicians and patients. *Health Care Manage Rev* 2008;33(1):29-39.
33. Ratanawongsa N, Roter D, Beach MC, et al. Physician burnout and patient-physician communication during primary care encounters. *J Gen Intern Med* 2008;23(10):1581-1588.
34. Travado L, Grassi L, Gil F, Ventura C, Martins C, Southern European Psycho-Oncology Study G. Physician-patient communication among Southern European cancer physicians: the influence of psychosocial orientation and burnout. *Psychooncology* 2005;14(8):661-670.
35. Weng HC, Hung CM, Liu YT, et al. Associations between emotional intelligence and doctor burnout, job satisfaction and patient satisfaction. *Med Educ* 2011;45(8):835-842.
36. Baker R. Development of a questionnaire to assess patients' satisfaction with consultations in general practice. *Br J Gen Pract* 1990;40(341):487-490.



- 1
- 2
- 3
- 4 37. Poulton BC. Use of the consultation satisfaction questionnaire to examine patients' satisfaction with general practitioners and community nurses: reliability, replicability and discriminant validity. *Br J Gen Pract* 1996;46(402):26-31.
- 5
- 6 38. Scardina SA. SERVQUAL: a tool for evaluating patient satisfaction with nursing care. *J Nurs Care Qual* 1994;8(2):38-46.
- 7
- 8 39. Asubonteng P, McCleary KJ, Swan JE. SERVQUAL revisited: a critical review of service quality. *Journal of Services Marketing* 1996;10(6):62-81.
- 9
- 10 40. Dolan ED, Mohr D, Lempa M, et al. Using a single item to measure burnout in primary care staff: a psychometric evaluation. *J Gen Intern Med* 2015;30(5):582-587.
- 11
- 12 41. Roter D, Larson S. The Roter interaction analysis system (RIAS): utility and flexibility for analysis of medical interactions. *Patient Educ Couns* 2002;46(4):243-251.
- 13
- 14 42. Shanafelt TD, Balch CM, Bechamps G, et al. Burnout and medical errors among American surgeons. *Ann Surg* 2010;251(6):995-1000.
- 15
- 16 43. Shirom A, Nirel N, Vinokur AD. Overload, autonomy, and burnout as predictors of physicians' quality of care. *J Occup Health Psychol* 2006;11(4):328-342.
- 17
- 18 44. Parle M, Maguire P, Heaven C. The development of a training model to improve health professionals' skills, self-efficacy and outcome expectancies when communicating with cancer patients. *Soc Sci Med* 1997;44(2):231-240.
- 19
- 20 45. Weigl M, Schneider A, Hoffmann F, Angerer P. Work stress, burnout, and perceived quality of care: a cross-sectional study among hospital pediatricians. *Eur J Pediatr* 2015;174(9):1237-1246.
- 21
- 22 46. Wen J, Cheng Y, Hu X, Yuan P, Hao T, Shi Y. Workload, burnout, and medical mistakes among physicians in China: A cross-sectional study. *Biosci Trends* 2016;10(1):27-33.
- 23
- 24 47. Kersnik J. Patients' recommendation of doctor as an indicator of patient satisfaction. *Hong Kong Medical Journal* 2003;9(4):247-250.
- 25
- 26 48. Kristensen TS, Borritz M, Villadsen E, Christensen KB. The Copenhagen Burnout Inventory: A new tool for the assessment of burnout. *Work Stress* 2005;19:192-207.
- 27
- 28 49. Lundgren-Nilsson A, Jonsdottir IH, Pallant J, Ahlborg G, Jr. Internal construct validity of the Shirom-Melamed Burnout Questionnaire (SMBQ). *BMC Public Health* 2012;12:1.
- 29
- 30 50. Shirom A, Melamed S. A Comparison of the Construct Validity of Two Burnout Measures in Two Groups of Professionals. *International Journal of Stress Management* 2006;13(2):176-200.
- 31
- 32 51. Qiao H, Schaufeli WB. The Convergent Validity of Four Burnout Measures in a Chinese Sample: A Confirmatory Factor-Analytic Approach. *Applied Psychology* 2011;60(1):87-111.
- 33
- 34 52. Winwood PC, Winefield AH. Comparing two measures of burnout among dentists in Australia. *International Journal of Stress Management* 2004;11:282-289.
- 35
- 36 53. Kaldjian LC, Jones EW, Wu BJ, Forman-Hoffman VL, Levi BH, Rosenthal GE. Reporting medical errors to improve patient safety: a survey of physicians in teaching hospitals. *Arch Intern Med* 2008;168(1):40-46.
- 37
- 38 54. Davis DA, Mazmanian PE, Fordis M, Van Harrison R, Thorpe KE, Perrier L. Accuracy of physician self-assessment compared with observed measures of competence: a systematic review. *JAMA* 2006;296(9):1094-1102.
- 39
- 40 55. Hall W, Violato C, Lewkonja R, et al. Assessment of physician performance in Alberta: the physician achievement review. *CMAJ* 1999;161(1):52-57.
- 41
- 42
- 43
- 44
- 45
- 46
- 47
- 48
- 49
- 50
- 51
- 52
- 53
- 54
- 55
- 56
- 57
- 58
- 59
- 60

- 1  
2  
3 56. Parasuraman A, Zeithaml VA, Berry LL. SERVQUAL: A multiple-item scale for  
4 measuring consumer perceptions of service quality. *Journal of Retailing* 1988;64:12-40.  
5 57. Roter D. An exploration of health education's responsibility for a partnership model of  
6 client-provider relations. *Patient Educ Couns* 1987;9(1):25-31.  
7 58. Roter DL, Stewart M, Putnam SM, Lipkin M, Jr., Stiles W, Inui TS. Communication  
8 patterns of primary care physicians. *JAMA* 1997;277(4):350-356.  
9 59. Schaufeli WB, Leiter MP, Maslach C. Burnout: 35 years of research and practice. *Career*  
10 *Development International* 2009;14(3):204-220.  
11 60. Podsakoff PM, MacKenzie SB, Lee JY, Podsakoff NP. Common method biases in  
12 behavioral research: a critical review of the literature and recommended remedies. *J Appl*  
13 *Psychol* 2003;88(5):879-903.  
14 61. Fahrenkopf AM, Sectish TC, Barger LK, et al. Rates of medication errors among  
15 depressed and burnt out residents: prospective cohort study. *BMJ* 2008;336(7642):488-  
16 491.  
17 62. West CP, Tan AD, Habermann TM, Sloan JA, Shanafelt TD. Association of resident  
18 fatigue and distress with perceived medical errors. *JAMA* 2009;302(12):1294-1300.  
19 63. Nissen SB, Magidson T, Gross K, Bergstrom CT. Publication Bias and the Cannonization  
20 of False Facts. *arXiv:1609.00494v1 [physics.soc-ph]* 2016.  
21 64. Martin JL, Perez V, Sacristan M, Alvarez E. Is grey literature essential for a better  
22 control of publication bias in psychiatry? An example from three meta-analyses of  
23 schizophrenia. *Eur Psychiatry* 2005;20(8):550-553.  
24  
25  
26  
27  
28  
29  
30  
31

## 32 FIGURES, TABLES AND SUPPLEMENTARY FILES LEGEND

33  
34 Figure 1. Flowchart of Accepted/ Rejected Articles

35  
36 Figure 2. Summary of Risk of Bias Across Studies

37  
38 Table 1. Description of the Studies

39  
40 Table 2. Patient Safety and Acceptability Related Quality of Care Outcomes

41  
42 Supplementary File 1: Search Terms Used in Search Strategy

43  
44 Supplementary File 2: Risk of Bias Assessment Checklist

45  
46 Supplementary File 3: PRISMA Checklist  
47  
48  
49  
50  
51  
52  
53  
54  
55  
56  
57  
58  
59  
60



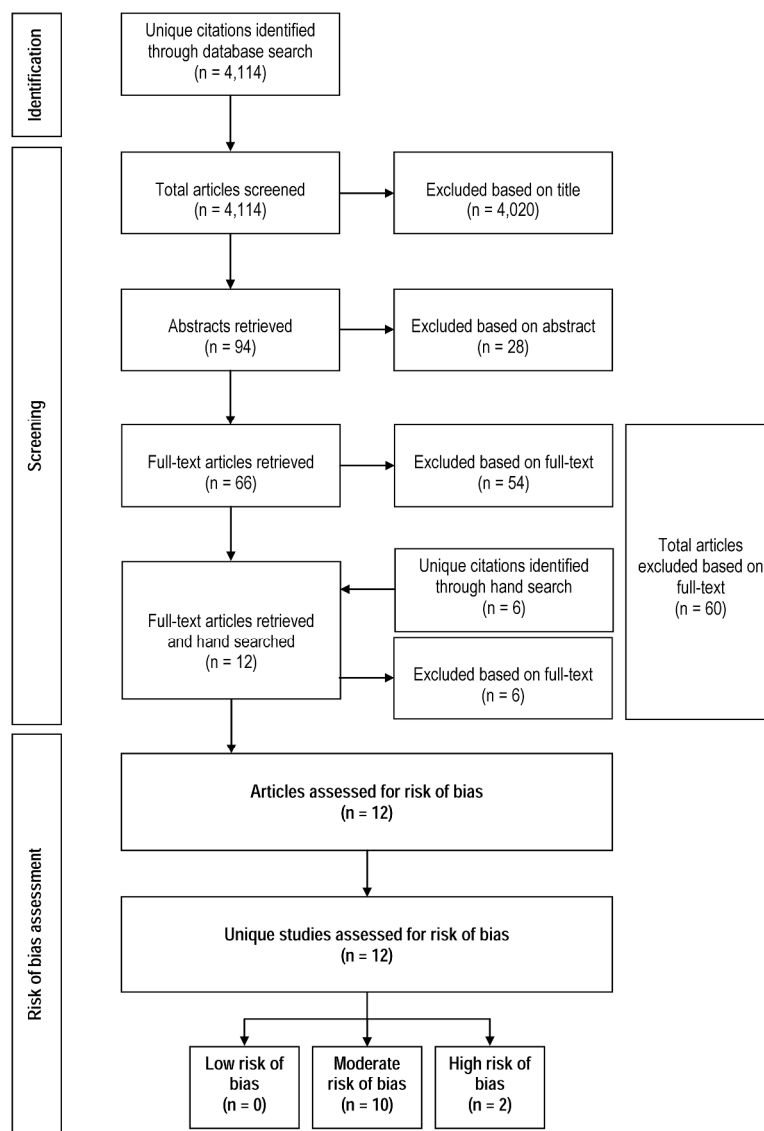

Figure 1. Flowchart of Accepted/ Rejected Articles

279x361mm (300 x 300 DPI)

1  
2  
3  
4  
5  
6  
7  
8  
9  
10  
11  
12  
13  
14  
15  
16  
17  
18  
19  
20  
21  
22  
23  
24  
25  
26  
27  
28  
29  
30  
31  
32  
33  
34  
35  
36  
37  
38  
39  
40  
41  
42  
43  
44  
45  
46  
47  
48  
49  
50  
51  
52  
53  
54  
55  
56  
57  
58  
59  
60

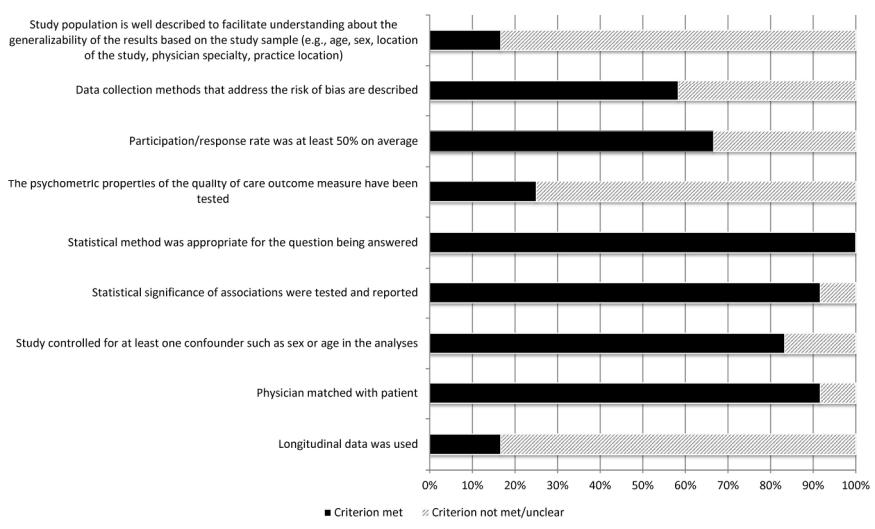

Figure 2. Summary of Risk of Bias Across Studies

215x166mm (300 x 300 DPI)

View only

## Search terms used in search strategy

| Database           | Search Terms                                                                                                                                                                                                                                                                                                                                                                                                                                                                                                                                                                                                                                                                                                                                                                                                                                                                                                                                                                                                                                                                                                                                                                                                                                                                                                                                                                                                                                                                                                                                                                                                                                                                                                                                                                                                                                                                                                                                                                                                                                                                                                                                                                                                                                                                                                                                                                                                                                                                                                                                                                                                                                                                                                                                                                                                                                                                                                                                                                                                                                                                                                                                                                                                                                                                                                                                                                                                                                                                                                                                                                                                                                                                                                                                                                                                                                                                                                                                                                                                                                                                                                                                                                                                                                                                                                                                                                                                                                                                                                                                                                                                                                                                                                                                                                                                                                                                                                                                                  |
|--------------------|---------------------------------------------------------------------------------------------------------------------------------------------------------------------------------------------------------------------------------------------------------------------------------------------------------------------------------------------------------------------------------------------------------------------------------------------------------------------------------------------------------------------------------------------------------------------------------------------------------------------------------------------------------------------------------------------------------------------------------------------------------------------------------------------------------------------------------------------------------------------------------------------------------------------------------------------------------------------------------------------------------------------------------------------------------------------------------------------------------------------------------------------------------------------------------------------------------------------------------------------------------------------------------------------------------------------------------------------------------------------------------------------------------------------------------------------------------------------------------------------------------------------------------------------------------------------------------------------------------------------------------------------------------------------------------------------------------------------------------------------------------------------------------------------------------------------------------------------------------------------------------------------------------------------------------------------------------------------------------------------------------------------------------------------------------------------------------------------------------------------------------------------------------------------------------------------------------------------------------------------------------------------------------------------------------------------------------------------------------------------------------------------------------------------------------------------------------------------------------------------------------------------------------------------------------------------------------------------------------------------------------------------------------------------------------------------------------------------------------------------------------------------------------------------------------------------------------------------------------------------------------------------------------------------------------------------------------------------------------------------------------------------------------------------------------------------------------------------------------------------------------------------------------------------------------------------------------------------------------------------------------------------------------------------------------------------------------------------------------------------------------------------------------------------------------------------------------------------------------------------------------------------------------------------------------------------------------------------------------------------------------------------------------------------------------------------------------------------------------------------------------------------------------------------------------------------------------------------------------------------------------------------------------------------------------------------------------------------------------------------------------------------------------------------------------------------------------------------------------------------------------------------------------------------------------------------------------------------------------------------------------------------------------------------------------------------------------------------------------------------------------------------------------------------------------------------------------------------------------------------------------------------------------------------------------------------------------------------------------------------------------------------------------------------------------------------------------------------------------------------------------------------------------------------------------------------------------------------------------------------------------------------------------------------------------------------------------------|
| Medline Current    | <p>[exp Burnout, Professional/ OR burnout.mp. OR (burnout adj3 effect\$.mp.)] AND [exp Physicians/ OR exp Psychiatry/ OR allergist\$.mp. OR anesthesiologist\$.mp. OR cardiologist\$.mp. OR clinical pharmacologist\$.mp. OR clinical toxicologist\$.mp. OR dermatologist\$.mp. OR doctor\$.mp. OR endocrinologist\$.mp. OR gastroenterologist\$.mp. OR gynecologist\$.mp. OR hematologist\$.mp. OR immunologist\$.mp. OR medical biochemist\$.mp. OR medical geneticist\$.mp. OR medical microbiologist\$.mp. OR nephrologist\$.mp. OR neurologist\$.mp. OR neuropathologist\$.mp. OR neuroradiologist\$.mp. OR occupational physician\$.mp. OR oncologist\$.mp. OR ophthalmologist\$.mp. OR pathologist\$.mp. OR pediatrician\$.mp. OR physician\$.mp. OR psychiatrist\$.mp. OR radiologist\$.mp. OR rheumatologist\$.mp. OR surgeon\$.mp. OR urologist\$.mp.] AND [exp Diagnostic Errors/ OR exp Medical Errors/ OR exp Medication Errors/ OR exp "Quality of Health Care"/ OR exp Quality Assurance, Health Care/ OR misdiag\$.mp. OR (diagnos\$ adj3 error\$.mp. OR (medical\$ adj3 error\$.mp. OR (medication\$ adj3 error\$.mp. OR (drug\$ adj3 error\$.mp. OR (mistak\$ adj3 medic\$.mp. OR (surgic\$ adj3 error\$.mp. OR (quality\$ adj3 health\$ adj3 care\$.mp. OR (quality\$ adj3 healthcare\$.mp. OR (quality\$ adj3 of adj3 care\$.mp. OR exp Professional Competence/ OR (professional\$ adj3 competenc\$.mp. OR (technical\$ adj3 expertise\$.mp. OR (expertise\$ adj3 generaliz\$.mp. OR professionalism\$.mp. OR exp Treatment Outcome/ OR (treat\$ adj3 outcome\$.mp. OR (patient\$ adj3 outcome\$.mp. OR exp Professional Impairment/ OR (impair\$ adj3 physician\$.mp. OR (impair\$ adj3 doctor\$.mp. OR (disruptive\$ adj3 behav\$.mp. OR exp Safety/ OR safe\$.mp. OR exp Risk/ OR risk\$.mp. OR exp Patient Satisfaction/ OR (patient\$ adj3 satisf\$.mp. OR (client\$ adj3 satisf\$.mp. OR exp Professional-Patient Relations/ OR (professional\$ adj3 patient\$ adj3 relation\$.mp. OR (client\$ adj3 contact\$.mp. OR exp Physician-Patient Relations/ OR (physician\$ adj3 patient\$ adj3 relation\$.mp. OR (doctor\$ adj3 patient\$ adj3 relation\$.mp. OR exp Communication/ OR communicat\$.mp. OR misinform\$.mp. OR exp Health Communication/ OR exp "Attitude of Health Personnel"/ OR attitude\$.mp. OR exp Clinical Competence/ OR (clinical\$ adj3 competenc\$.mp. OR (clinical\$ adj3 skill\$.mp. OR exp Patient-Centered Care/ OR (patient\$ adj3 cent\$ adj3 care\$.mp. OR (patient\$ adj3 focus\$ adj3 care\$.mp. OR exp Empathy/ OR empath\$.mp. OR exp Patient Care/ OR (patient\$ adj3 care\$.mp. OR (informal\$ adj3 care\$.mp. OR exp "Standard of Care"/ OR (standard\$ adj3 care\$.mp. OR st.fs. [standards - floating subheading] OR exp Self Efficacy/ OR efficacy\$.mp. OR exp Clinical Audit/ OR audit\$.mp. OR exp Medical Audit/ OR (diagnos\$ adj3 mistak\$.mp. OR (medication\$ adj3 mistak\$.mp. OR (drug\$ adj3 mistak\$.mp. OR (surgic\$ adj3 mistak\$.mp. OR exp Safety Management/ OR (program\$ adj3 hazard\$ adj3 surveillance\$.mp. OR (management\$ adj3 safety\$.mp. OR (hazard\$ adj3 control\$.mp. OR (hazard\$ adj3 management\$.mp. OR exp Malpractice/ OR malpractic\$.mp. OR negligenc\$.mp. OR exp Morbidity/ OR morbidity\$.mp. OR exp Postoperative Complications/ OR (postoperative\$ adj3 complication\$.mp. OR exp Cross Infection/ OR (nosocomial\$ adj3 infection\$.mp. OR (hospital\$ adj3 infection\$.mp. OR (cross\$ adj3 infection\$.mp. OR exp Physician's Practice Patterns/ OR (practice\$ adj3 pattern\$ adj3 clinical\$.mp. OR (practice\$ adj3 pattern\$ adj3 physician\$.mp. OR (prescribing\$ adj3 pattern\$ adj3 physician\$.mp. OR (practice\$ adj3 pattern\$ adj3 professional\$.mp. OR (practice\$ adj3 pattern\$ adj3 variation\$.mp. OR (practice\$ adj3 clinical\$ adj3 variation\$.mp. OR (practice\$ adj3 medical\$ adj3 variation\$.mp. OR exp Mortality/ OR (rate\$ adj3 age-specific\$ adj3 death\$.mp. OR (rate\$ adj3 death\$.mp. OR (rate\$ adj3 fatalit\$.mp. OR mortalit\$.mp. OR exp "Outcome Assessment (Health Care)/ OR (measure\$ adj3 outcome\$.mp. OR (assessment\$ adj3 outcome\$.mp. OR (research\$ adj3 outcome\$.mp. OR (stud\$ adj3 outcome\$.mp. OR (assessment\$ adj3 patient\$ adj3 outcome\$.mp. OR (research\$ adj3 patient\$ adj3 outcome\$.mp. OR exp Risk Reduction Behavior/ OR exp Risk-Taking/ OR exp "Root Cause Analysis"/ OR (cause\$ adj3 root\$ adj3 analys\$.mp. OR exp "Drug-Related Side Effects and Adverse Reactions"/ OR (drug\$ adj3 side\$ adj3 effect\$.mp. OR (drug\$ adj3 toxic\$.mp. OR (drug\$ adj3 reaction\$ adj3 adverse\$.mp. OR (drug\$ adj3 event\$ adj3 adverse\$.mp. OR ae.fs. [adverse effects floating subheading] OR mo.fs. [mortality floating subheading] OR po.fs. [poisoning floating subheading] OR to.fs. [toxicity floating subheading] OR in.fs. [injuries floating subheading]]</p> |
| Medline In-process | <p>[exp Burnout, Professional/ OR burnout.mp. OR (burnout adj3 effect\$.mp.)] AND [exp Physicians/ OR exp Psychiatry/ OR allergist\$.mp. OR anesthesiologist\$.mp. OR cardiologist\$.mp. OR clinical pharmacologist\$.mp. OR clinical toxicologist\$.mp. OR dermatologist\$.mp. OR doctor\$.mp. OR endocrinologist\$.mp. OR gastroenterologist\$.mp. OR gynecologist\$.mp. OR hematologist\$.mp. OR immunologist\$.mp. OR medical biochemist\$.mp. OR medical geneticist\$.mp. OR medical microbiologist\$.mp. OR nephrologist\$.mp. OR neurologist\$.mp. OR neuropathologist\$.mp. OR neuroradiologist\$.mp. OR occupational physician\$.mp. OR oncologist\$.mp. OR ophthalmologist\$.mp. OR pathologist\$.mp. OR pediatrician\$.mp. OR physician\$.mp. OR psychiatrist\$.mp. OR radiologist\$.mp. OR rheumatologist\$.mp. OR surgeon\$.mp. OR urologist\$.mp.] AND [exp Diagnostic Errors/ OR exp Medical Errors/ OR exp Medication Errors/ OR exp "Quality of Health Care"/ OR exp Quality Assurance, Health Care/ OR misdiag\$.mp. OR (diagnos\$ adj3 error\$.mp. OR (medical\$ adj3 error\$.mp. OR (medication\$ adj3 error\$.mp. OR (drug\$ adj3 error\$.mp. OR (mistak\$ adj3 medic\$.mp. OR (surgic\$ adj3 error\$.mp. OR (quality\$ adj3 health\$ adj3 care\$.mp. OR (quality\$ adj3 healthcare\$.mp. OR (quality\$ adj3 of adj3 care\$.mp. OR exp Professional Competence/ OR (professional\$ adj3 competenc\$.mp. OR (technical\$ adj3 expertise\$.mp. OR (expertise\$ adj3 generaliz\$.mp. OR professionalism\$.mp. OR exp Treatment Outcome/ OR (treat\$ adj3 outcome\$.mp. OR (patient\$ adj3 outcome\$.mp. OR exp Professional Impairment/ OR (impair\$ adj3 physician\$.mp. OR (impair\$ adj3 doctor\$.mp. OR (disruptive\$ adj3 behav\$.mp. OR exp Safety/ OR safe\$.mp. OR exp Risk/ OR risk\$.mp. OR exp Patient Satisfaction/ OR (patient\$ adj3 satisf\$.mp. OR (client\$ adj3 satisf\$.mp. OR exp Professional-Patient Relations/ OR (professional\$ adj3 patient\$ adj3 relation\$.mp. OR (client\$ adj3 contact\$.mp. OR exp Physician-Patient Relations/ OR (physician\$ adj3 patient\$ adj3 relation\$.mp. OR (doctor\$ adj3 patient\$ adj3 relation\$.mp. OR exp Communication/ OR communicat\$.mp. OR misinform\$.mp. OR exp Health Communication/ OR exp "Attitude of Health Personnel"/ OR attitude\$.mp. OR exp Clinical Competence/ OR (clinical\$ adj3 competenc\$.mp. OR (clinical\$ adj3 skill\$.mp. OR exp Patient-</p>                                                                                                                                                                                                                                                                                                                                                                                                                                                                                                                                                                                                                                                                                                                                                                                                                                                                                                                                                                                                                                                                                                                                                                                                                                                                                                                                                                                                                                                                                                                                                                                                                                                                                                                                                                                                                                                                                                                                                                                                                                                                                                                                                                                                                                                                                                                                                                                                                                                                                                   |

| Database                             | Search Terms                                                                                                                                                                                                                                                                                                                                                                                                                                                                                                                                                                                                                                                                                                                                                                                                                                                                                                                                                                                                                                                                                                                                                                                                                                                                                                                                                                                                                                                                                                                                                                                                                                                                                                                                                                                                                                                                                                                                                                                                                                                                                                                                                                                                                                                                                                                                                                                                                                                                                                                                                                                                                                                                                                                                                                                                                                                                                                                                                                                                                                                                                                                                                                                                                                                                                                                                                                                                                                                                                                                                                                                                                                                                                                                                                                                                                                                                                                                                                                                                                                                                                                                                                                                                                                                                                                                                                                                                                                                                                                                                                                                                                                                                                                                                                                                                                                                                                                                                                                                                                |
|--------------------------------------|-----------------------------------------------------------------------------------------------------------------------------------------------------------------------------------------------------------------------------------------------------------------------------------------------------------------------------------------------------------------------------------------------------------------------------------------------------------------------------------------------------------------------------------------------------------------------------------------------------------------------------------------------------------------------------------------------------------------------------------------------------------------------------------------------------------------------------------------------------------------------------------------------------------------------------------------------------------------------------------------------------------------------------------------------------------------------------------------------------------------------------------------------------------------------------------------------------------------------------------------------------------------------------------------------------------------------------------------------------------------------------------------------------------------------------------------------------------------------------------------------------------------------------------------------------------------------------------------------------------------------------------------------------------------------------------------------------------------------------------------------------------------------------------------------------------------------------------------------------------------------------------------------------------------------------------------------------------------------------------------------------------------------------------------------------------------------------------------------------------------------------------------------------------------------------------------------------------------------------------------------------------------------------------------------------------------------------------------------------------------------------------------------------------------------------------------------------------------------------------------------------------------------------------------------------------------------------------------------------------------------------------------------------------------------------------------------------------------------------------------------------------------------------------------------------------------------------------------------------------------------------------------------------------------------------------------------------------------------------------------------------------------------------------------------------------------------------------------------------------------------------------------------------------------------------------------------------------------------------------------------------------------------------------------------------------------------------------------------------------------------------------------------------------------------------------------------------------------------------------------------------------------------------------------------------------------------------------------------------------------------------------------------------------------------------------------------------------------------------------------------------------------------------------------------------------------------------------------------------------------------------------------------------------------------------------------------------------------------------------------------------------------------------------------------------------------------------------------------------------------------------------------------------------------------------------------------------------------------------------------------------------------------------------------------------------------------------------------------------------------------------------------------------------------------------------------------------------------------------------------------------------------------------------------------------------------------------------------------------------------------------------------------------------------------------------------------------------------------------------------------------------------------------------------------------------------------------------------------------------------------------------------------------------------------------------------------------------------------------------------------------------------------------|
|                                      | <p>Centered Care/ OR (patient\$ adj3 cent\$ adj3 care\$).mp. OR (patient\$ adj3 focus\$ adj3 care\$).mp. OR exp Empathy/ OR empath\$.mp. OR exp Patient Care/ OR (patient\$ adj3 care\$).mp. OR (informal\$ adj3 care\$).mp. OR exp "Standard of Care"/ OR (standard\$ adj3 care\$).mp. OR st.fs. [standards - floating subheading] OR exp Self Efficacy/ OR efficacy\$.mp. OR exp Clinical Audit/ OR audit\$.mp. OR exp Medical Audit/ OR (diagnos\$ adj3 mistak\$).mp. OR (medication\$ adj3 mistak\$).mp. OR (drug\$ adj3 mistak\$).mp. OR (surgic\$ adj3 mistak\$).mp. OR exp Safety Management/ OR (program\$ adj3 hazard\$ adj3 surveillance\$).mp. OR (management\$ adj3 safety\$).mp. OR (hazard\$ adj3 control\$).mp. OR (hazard\$ adj3 management\$).mp. OR exp Malpractice/ OR malpractic\$.mp. OR negligenc\$.mp. OR exp Morbidity/ OR morbidity\$.mp. OR exp Postoperative Complications/ OR (postoperative\$ adj3 complication\$).mp. OR exp Cross Infection/ OR (nosocomial\$ adj3 infection\$).mp. OR (hospital\$ adj3 infection\$).mp. OR (cross\$ adj3 infection\$).mp. OR exp Physician's Practice Patterns/ OR (practice\$ adj3 pattern\$ adj3 clinical\$).mp. OR (practice\$ adj3 pattern\$ adj3 physician\$).mp. OR (prescribing\$ adj3 pattern\$ adj3 physician\$).mp. OR (practice\$ adj3 pattern\$ adj3 professional\$).mp. OR (practice\$ adj3 pattern\$ adj3 variation\$).mp. OR (practice\$ adj3 clinical\$ adj3 variation\$).mp. OR (practice\$ adj3 medical\$ adj3 variation\$).mp. OR exp Mortality/ OR (rate\$ adj3 age-specific\$ adj3 death\$).mp. OR (rate\$ adj3 death\$).mp. OR (rate\$ adj3 fatalit\$).mp. OR mortalit\$.mp. OR exp "Outcome Assessment (Health Care)"/ OR (measure\$ adj3 outcome\$).mp. OR (assessment\$ adj3 outcome\$).mp. OR (research\$ adj3 outcome\$).mp. OR (stud\$ adj3 outcome\$).mp. OR (assessment\$ adj3 patient\$ adj3 outcome\$).mp. OR (research\$ adj3 patient\$ adj3 outcome\$).mp. OR exp Risk Reduction Behavior/ OR exp Risk-Taking/ OR exp "Root Cause Analysis"/ OR (cause\$ adj3 root\$ adj3 analys\$).mp. OR exp "Drug-Related Side Effects and Adverse Reactions"/ OR (drug\$ adj3 side\$ adj3 effect\$).mp. OR (drug\$ adj3 toxic\$).mp. OR (drug\$ adj3 reaction\$ adj3 adverse\$).mp. OR (drug\$ adj3 event\$ adj3 adverse\$).mp. OR ae.fs. [adverse effects floating subheading] OR mo.fs. [mortality floating subheading] OR po.fs. [poisoning floating subheading] OR to.fs. [toxicity floating subheading] OR in.fs. [injuries floating subheading]</p>                                                                                                                                                                                                                                                                                                                                                                                                                                                                                                                                                                                                                                                                                                                                                                                                                                                                                                                                                                                                                                                                                                                                                                                                                                                                                                                                                                                                                                                                                                                                                                                                                                                                                                                                                                                                                                                                                                                                                                                                                                                                                                                                                                                                                                                                                                                                                                                                                                                                             |
| Medline<br>Epub<br>Ahead of<br>Print | <p>[exp Burnout, Professional/ OR burnout.mp. OR (burnout adj3 effect\$.mp.) AND [exp Physicians/ OR exp Psychiatry/ OR allergist\$.mp. OR anesthesiologist\$.mp. OR cardiologist\$.mp. OR clinical pharmacologist\$.mp. OR clinical toxicologist\$.mp. OR dermatologist\$.mp. OR doctor\$.mp. OR endocrinologist\$.mp. OR gastroenterologist\$.mp. OR gynecologist\$.mp. OR hematologist\$.mp. OR immunologist\$.mp. OR medical biochemist\$.mp. OR medical geneticist\$.mp. OR medical microbiologist\$.mp. OR nephrologist\$.mp. OR neurologist\$.mp. OR neuropathologist\$.mp. OR neuroradiologist\$.mp. OR occupational physician\$.mp. OR oncologist\$.mp. OR ophthalmologist\$.mp. OR pathologist\$.mp. OR pediatrician\$.mp. OR physician\$.mp. OR psychiatrist\$.mp. OR radiologist\$.mp. OR rheumatologist\$.mp. OR surgeon\$.mp. OR urologist\$.mp.] AND [exp Diagnostic Errors/ OR exp Medical Errors/ OR exp Medication Errors/ OR exp "Quality of Health Care"/ OR exp Quality Assurance, Health Care/ OR misdiag\$.mp. OR (diagnos\$ adj3 error\$).mp. OR (medical\$ adj3 error\$).mp. OR (medication\$ adj3 error\$).mp. OR (drug\$ adj3 error\$).mp. OR (mistak\$ adj3 medic\$).mp. OR (surgic\$ adj3 error\$).mp. OR (quality\$ adj3 health\$ adj3 care\$).mp. OR (quality\$ adj3 healthcare\$).mp. OR (quality\$ adj3 of adj3 care\$).mp. OR exp Professional Competence/ OR (professional\$ adj3 competenc\$).mp. OR (technical\$ adj3 expertise\$).mp. OR (expertise\$ adj3 generaliz\$).mp. OR professionalism\$.mp. OR exp Treatment Outcome/ OR (treat\$ adj3 outcome\$).mp. OR (patient\$ adj3 outcome\$).mp. OR exp Professional Impairment/ OR (impair\$ adj3 physician\$).mp. OR (impair\$ adj3 doctor\$).mp. OR (disruptive\$ adj3 behav\$).mp. OR exp Safety/ OR safe\$.mp. OR exp Risk/ OR risk\$.mp. OR exp Patient Satisfaction/ OR (patient\$ adj3 satisf\$).mp. OR (client\$ adj3 satisf\$).mp. OR exp Professional-Patient Relations/ OR (professional\$ adj3 patient\$ adj3 relation\$).mp. OR (client\$ adj3 contact\$).mp. OR exp Physician-Patient Relations/ OR (physician\$ adj3 patient\$ adj3 relation\$).mp. OR (doctor\$ adj3 patient\$ adj3 relation\$).mp. OR exp Communication/ OR communicat\$.mp. OR misinform\$.mp. OR exp Health Communication/ OR exp "Attitude of Health Personnel"/ OR attitude\$.mp. OR exp Clinical Competence/ OR (clinical\$ adj3 competenc\$).mp. OR (clinical\$ adj3 skill\$).mp. OR exp Patient-Centered Care/ OR (patient\$ adj3 cent\$ adj3 care\$).mp. OR (patient\$ adj3 focus\$ adj3 care\$).mp. OR exp Empathy/ OR empath\$.mp. OR exp Patient Care/ OR (patient\$ adj3 care\$).mp. OR (informal\$ adj3 care\$).mp. OR exp "Standard of Care"/ OR (standard\$ adj3 care\$).mp. OR st.fs. [standards - floating subheading] OR exp Self Efficacy/ OR efficacy\$.mp. OR exp Clinical Audit/ OR audit\$.mp. OR exp Medical Audit/ OR (diagnos\$ adj3 mistak\$).mp. OR (medication\$ adj3 mistak\$).mp. OR (drug\$ adj3 mistak\$).mp. OR (surgic\$ adj3 mistak\$).mp. OR exp Safety Management/ OR (program\$ adj3 hazard\$ adj3 surveillance\$).mp. OR (management\$ adj3 safety\$).mp. OR (hazard\$ adj3 control\$).mp. OR (hazard\$ adj3 management\$).mp. OR exp Malpractice/ OR malpractic\$.mp. OR negligenc\$.mp. OR exp Morbidity/ OR morbidity\$.mp. OR exp Postoperative Complications/ OR (postoperative\$ adj3 complication\$).mp. OR exp Cross Infection/ OR (nosocomial\$ adj3 infection\$).mp. OR (hospital\$ adj3 infection\$).mp. OR (cross\$ adj3 infection\$).mp. OR exp Physician's Practice Patterns/ OR (practice\$ adj3 pattern\$ adj3 clinical\$).mp. OR (practice\$ adj3 pattern\$ adj3 physician\$).mp. OR (prescribing\$ adj3 pattern\$ adj3 physician\$).mp. OR (practice\$ adj3 pattern\$ adj3 professional\$).mp. OR (practice\$ adj3 pattern\$ adj3 variation\$).mp. OR (practice\$ adj3 clinical\$ adj3 variation\$).mp. OR (practice\$ adj3 medical\$ adj3 variation\$).mp. OR exp Mortality/ OR (rate\$ adj3 age-specific\$ adj3 death\$).mp. OR (rate\$ adj3 death\$).mp. OR (rate\$ adj3 fatalit\$).mp. OR mortalit\$.mp. OR exp "Outcome Assessment (Health Care)"/ OR (measure\$ adj3 outcome\$).mp. OR (assessment\$ adj3 outcome\$).mp. OR (research\$ adj3 outcome\$).mp. OR (stud\$ adj3 outcome\$).mp. OR (assessment\$ adj3 patient\$ adj3 outcome\$).mp. OR (research\$ adj3 patient\$ adj3 outcome\$).mp. OR exp Risk Reduction Behavior/ OR exp Risk-Taking/ OR exp "Root Cause Analysis"/ OR (cause\$ adj3 root\$ adj3 analys\$).mp. OR exp "Drug-Related Side Effects and Adverse Reactions"/ OR (drug\$ adj3 side\$ adj3 effect\$).mp. OR (drug\$ adj3 toxic\$).mp. OR (drug\$ adj3 reaction\$ adj3 adverse\$).mp. OR (drug\$ adj3 event\$ adj3 adverse\$).mp. OR ae.fs. [adverse effects floating subheading] OR mo.fs. [mortality floating subheading] OR po.fs. [poisoning floating subheading] OR to.fs. [toxicity floating subheading] OR in.fs. [injuries floating subheading]</p> |

| Database  | Search Terms                                                                                                                                                                                                                                                                                                                                                                                                                                                                                                                                                                                                                                                                                                                                                                                                                                                                                                                                                                                                                                                                                                                                                                                                                                                                                                                                                                                                                                                                                                                                                                                                                                                                                                                                                                                                                                                                                                                                                                                                                                                                                                                                                                                                                                                                                                                                                                                                                                                                                                                                                                                                                                                                                                                                                                                                                                                                                                                                                                                                                                                                                                                                                                                                                                                                                                                                                                                                                                                                                                                                                                                                                                                                                                                                                                                                                                                                                                                                                                                                                                                                                                                                                                                                                                                                                                                                                                                                                                                                                                                                                                                                                                                                                                                                                                                                                                                                                                                                                                                                                                                                          |
|-----------|---------------------------------------------------------------------------------------------------------------------------------------------------------------------------------------------------------------------------------------------------------------------------------------------------------------------------------------------------------------------------------------------------------------------------------------------------------------------------------------------------------------------------------------------------------------------------------------------------------------------------------------------------------------------------------------------------------------------------------------------------------------------------------------------------------------------------------------------------------------------------------------------------------------------------------------------------------------------------------------------------------------------------------------------------------------------------------------------------------------------------------------------------------------------------------------------------------------------------------------------------------------------------------------------------------------------------------------------------------------------------------------------------------------------------------------------------------------------------------------------------------------------------------------------------------------------------------------------------------------------------------------------------------------------------------------------------------------------------------------------------------------------------------------------------------------------------------------------------------------------------------------------------------------------------------------------------------------------------------------------------------------------------------------------------------------------------------------------------------------------------------------------------------------------------------------------------------------------------------------------------------------------------------------------------------------------------------------------------------------------------------------------------------------------------------------------------------------------------------------------------------------------------------------------------------------------------------------------------------------------------------------------------------------------------------------------------------------------------------------------------------------------------------------------------------------------------------------------------------------------------------------------------------------------------------------------------------------------------------------------------------------------------------------------------------------------------------------------------------------------------------------------------------------------------------------------------------------------------------------------------------------------------------------------------------------------------------------------------------------------------------------------------------------------------------------------------------------------------------------------------------------------------------------------------------------------------------------------------------------------------------------------------------------------------------------------------------------------------------------------------------------------------------------------------------------------------------------------------------------------------------------------------------------------------------------------------------------------------------------------------------------------------------------------------------------------------------------------------------------------------------------------------------------------------------------------------------------------------------------------------------------------------------------------------------------------------------------------------------------------------------------------------------------------------------------------------------------------------------------------------------------------------------------------------------------------------------------------------------------------------------------------------------------------------------------------------------------------------------------------------------------------------------------------------------------------------------------------------------------------------------------------------------------------------------------------------------------------------------------------------------------------------------------------------------------------------------------|
| PsyclINFO | <p>[burnout.mp. OR (burnout adj3 effect\$.mp.) AND [exp physicians/ OR exp clinicians/ OR exp Psychiatry/ OR allergist\$.mp. OR anesthesiologist\$.mp. OR cardiologist\$.mp. OR clinical pharmacologist\$.mp. OR clinical toxicologist\$.mp. OR dermatologist\$.mp. OR doctor\$.mp. OR endocrinologist\$.mp. OR gastroenterologist\$.mp. OR gynecologist\$.mp. OR hematologist\$.mp. OR immunologist\$.mp. OR medical biochemist\$.mp. OR medical geneticist\$.mp. OR medical microbiologist\$.mp. OR nephrologist\$.mp. OR neurologist\$.mp. OR neuropathologist\$.mp. OR neuroradiologist\$.mp. OR occupational physician\$.mp. OR oncologist\$.mp. OR ophthalmologist\$.mp. OR pathologist\$.mp. OR pediatrician\$.mp. OR physician\$.mp. OR psychiatrist\$.mp. OR radiologist\$.mp. OR rheumatologist\$.mp. OR surgeon\$.mp. OR urologist\$.mp.] AND [exp Errors/ OR exp "Quality of Care"/ OR misdiag\$.mp. OR (diagnos\$ adj3 error\$.mp. OR (medical\$ adj3 error\$.mp. OR (medication\$ adj3 error\$.mp. OR (drug\$ adj3 error\$.mp. OR (mistak\$ adj3 medic\$.mp. OR (surgic\$ adj3 error\$.mp. OR (quality\$ adj3 health\$ adj3 care\$.mp. OR (quality\$ adj3 healthcare\$.mp. OR (quality\$ adj3 of adj3 care\$.mp. OR exp Professional Competence/ OR (professional\$ adj3 competenc\$.mp. OR (technical\$ adj3 expertise\$.mp. OR (expertise\$ adj3 generaliz\$.mp. OR professionalism\$.mp. OR exp Treatment Outcome/ OR (treat\$ adj3 outcome\$.mp. OR (patient\$ adj3 outcome\$.mp. OR exp Impaired Professionals/ OR (impair\$ adj3 physician\$.mp. OR (impair\$ adj3 doctor\$.mp. OR (disruptive\$ adj3 behav\$.mp. OR exp Safety/ OR safe\$.mp. OR exp Risk Factors/ OR exp Risk Management/ OR exp Risk Assessment/ OR risk\$.mp. OR exp Client Satisfaction/ OR (patient\$ adj3 satisf\$.mp. OR (client\$ adj3 satisf\$.mp. OR exp Therapeutic Processes/ OR (professional\$ adj3 patient\$ adj3 relation\$.mp. OR (client\$ adj3 contact\$.mp. OR (physician\$ adj3 patient\$ adj3 relation\$.mp. OR (doctor\$ adj3 patient\$ adj3 relation\$.mp. OR exp Communication/ OR communicat\$.mp. OR misinform\$.mp. OR exp Communication Skills/ OR exp Communication Barriers/ OR exp Health Personnel Attitudes/ OR attitude\$.mp. OR exp Competence/ OR (clinical\$ adj3 competenc\$.mp. OR (clinical\$ adj3 skill\$.mp. OR exp Client Centered Therapy/ OR (patient\$ adj3 cent\$ adj3 care\$.mp. OR (patient\$ adj3 focus\$ adj3 care\$.mp. OR exp Empathy/ OR empath\$.mp. OR exp Patients/ OR (patient\$ adj3 care\$.mp. OR (informal\$ adj3 care\$.mp. OR exp Professional Standards/ OR (standard\$ adj3 care\$.mp. OR exp Self Efficacy/ OR efficacy\$.mp. OR exp Clinical Audits/ OR audit\$.mp. OR (diagnos\$ adj3 mistak\$.mp. OR (medication\$ adj3 mistak\$.mp. OR (drug\$ adj3 mistak\$.mp. OR (surgic\$ adj3 mistak\$.mp. OR (program\$ adj3 hazard\$ adj3 surveillance\$.mp. OR (management\$ adj3 safety\$.mp. OR (hazard\$ adj3 control\$.mp. OR (hazard\$ adj3 management\$.mp. OR exp Professional Liability/ OR malpractic\$.mp. OR negligenc\$.mp. OR exp Morbidity/ OR morbidit\$.mp. OR exp Postoperative Complications/ OR (postoperative\$ adj3 complication\$.mp. OR (nosocomial\$ adj3 infection\$.mp. OR (hospital\$ adj3 infection\$.mp. OR (cross\$ adj3 infection\$.mp. OR exp Clinical Practice/ OR (practice\$ adj3 pattern\$ adj3 clinical\$.mp. OR (practice\$ adj3 pattern\$ adj3 physician\$.mp. OR (prescribing\$ adj3 pattern\$ adj3 physician\$.mp. OR (practice\$ adj3 pattern\$ adj3 professional\$.mp. OR (practice\$ adj3 pattern\$ adj3 variation\$.mp. OR (practice\$ adj3 clinical\$ adj3 variation\$.mp. OR (practice\$ adj3 medical\$ adj3 variation\$.mp. OR exp Mortality Rate/ OR exp "Death and Dying"/ OR (rate\$ adj3 age-specific\$ adj3 death\$.mp. OR (rate\$ adj3 death\$.mp. OR (rate\$ adj3 fatalit\$.mp. OR mortalit\$.mp. OR exp Treatment Effectiveness Evaluation/ OR (measure\$ adj3 outcome\$.mp. OR (assessment\$ adj3 outcome\$.mp. OR (research\$ adj3 outcome\$.mp. OR (stud\$ adj3 outcome\$.mp. OR (assessment\$ adj3 patient\$ adj3 outcome\$.mp. OR (research\$ adj3 patient\$ adj3 outcome\$.mp. OR exp Risk-Taking/ OR exp Error Analysis/ OR (cause\$ adj3 root\$ adj3 analys\$.mp. OR exp "Side Effects (Drug)"/ OR (drug\$ adj3 side\$ adj3 effect\$.mp. OR (drug\$ adj3 toxic\$.mp. OR (drug\$ adj3 reaction\$ adj3 adverse\$.mp. OR (drug\$ adj3 event\$ adj3 adverse\$.mp. OR exp Toxic Disorders/ OR exp Injuries/ OR 3620.cc. [Personnel Management &amp; Selection &amp; Training classification code] OR 3630.cc. [Personnel Evaluation &amp; Job Performance classification code] OR 3650.cc. [Personnel Attitudes &amp; Job Satisfaction classification code] OR 3670.cc. [Working Conditions &amp; Industrial Safety classification code] OR 3430.cc. [Professional Personnel Attitudes &amp; Characteristics classification code] OR 3450.cc. [Professional Ethics &amp; Standards &amp; Liability code] OR 3470.cc. [Impaired Professionals classification code]]</p> |
| Embase    | <p>[exp Burnout/ OR burnout.mp. OR (burnout adj3 effect\$.mp.) AND [exp Physicians/ OR exp Psychiatry/ OR allergist\$.mp. OR anesthesiologist\$.mp. OR cardiologist\$.mp. OR clinical pharmacologist\$.mp. OR clinical toxicologist\$.mp. OR dermatologist\$.mp. OR doctor\$.mp. OR endocrinologist\$.mp. OR gastroenterologist\$.mp. OR gynecologist\$.mp. OR hematologist\$.mp. OR immunologist\$.mp. OR medical biochemist\$.mp. OR medical geneticist\$.mp. OR medical microbiologist\$.mp. OR nephrologist\$.mp. OR neurologist\$.mp. OR neuropathologist\$.mp. OR neuroradiologist\$.mp. OR occupational physician\$.mp. OR oncologist\$.mp. OR ophthalmologist\$.mp. OR pathologist\$.mp. OR pediatrician\$.mp. OR physician\$.mp. OR psychiatrist\$.mp. OR radiologist\$.mp. OR rheumatologist\$.mp. OR surgeon\$.mp. OR urologist\$.mp.] AND [exp Diagnostic Errors/ OR exp Medical Errors/ OR exp Medication Errors/ OR exp Health care quality/ OR exp Quality control/ OR misdiag\$.mp. OR (diagnos\$ adj3 error\$.mp. OR (medical\$ adj3 error\$.mp. OR (medication\$ adj3 error\$.mp. OR (drug\$ adj3 error\$.mp. OR (mistak\$ adj3 medic\$.mp. OR (surgic\$ adj3 error\$.mp. OR (quality\$ adj3 health\$ adj3 care\$.mp. OR (quality\$ adj3 healthcare\$.mp. OR (quality\$ adj3 of adj3 care\$.mp. OR exp Professional Competence/ OR (professional\$ adj3 competenc\$.mp. OR (technical\$ adj3 expertise\$.mp. OR (expertise\$ adj3 generaliz\$.mp. OR professionalism\$.mp. OR exp Treatment Outcome/ OR (treat\$ adj3 outcome\$.mp. OR (patient\$ adj3 outcome\$.mp. OR exp Malpractice/ OR (impair\$ adj3 physician\$.mp. OR (impair\$ adj3 doctor\$.mp. OR (disruptive\$ adj3 behav\$.mp. OR exp Safety/ OR safe\$.mp. OR exp Risk OR exp Risk Factors/ OR exp Risk Assessment/ OR exp Risk Management/ OR risk\$.mp. OR exp patient satisfaction/ OR (patient\$ adj3 satisf\$.mp. OR (client\$ adj3 satisf\$.mp. OR exp human relation/ OR (professional\$ adj3 patient\$ adj3 relation\$.mp. OR (client\$ adj3 contact\$.mp. OR exp doctor patient relation/ OR (physician\$ adj3 patient\$ adj3 relation\$.mp. OR (doctor\$ adj3 patient\$ adj3 relation\$.mp. OR exp interpersonal communication/ OR communicat\$.mp. OR misinform\$.mp. OR exp communication disorder/ OR exp communication skill/ OR exp health personnel attitude/ OR attitude\$.mp. OR exp clinical competence/ OR (clinical\$ adj3 competenc\$.mp. OR (clinical\$ adj3 skill\$.mp. OR exp patient care/ OR (patient\$ adj3 cent\$ adj3 care\$.mp. OR (patient\$ adj3 focus\$ adj3 care\$.mp. OR exp Empathy/ OR empath\$.mp. OR exp medical care/ OR (patient\$ adj3 care\$.mp. OR (informal\$ adj3 care\$.mp. OR exp professional standard/ OR (standard\$ adj3 care\$.mp. OR exp standard/ OR exp Self Efficacy/ OR efficacy\$.mp. OR exp medical</p>                                                                                                                                                                                                                                                                                                                                                                                                                                                                                                                                                                                                                                                                                                                                                                                                                                                                                                                                                                                                                                                                                                                                                                                                                                                                                                                                                                                                                                                                                                                                                                                                                                                                                                                                                                                                                                                                                                                                                                                                                                                                                                                                                                                                                                  |

| Database       | Search Terms                                                                                                                                                                                                                                                                                                                                                                                                                                                                                                                                                                                                                                                                                                                                                                                                                                                                                                                                                                                                                                                                                                                                                                                                                                                                                                                                                                                                                                                                                                                                                                                                                                                                                                                                                                                                                                                                                                                                                                                                              |
|----------------|---------------------------------------------------------------------------------------------------------------------------------------------------------------------------------------------------------------------------------------------------------------------------------------------------------------------------------------------------------------------------------------------------------------------------------------------------------------------------------------------------------------------------------------------------------------------------------------------------------------------------------------------------------------------------------------------------------------------------------------------------------------------------------------------------------------------------------------------------------------------------------------------------------------------------------------------------------------------------------------------------------------------------------------------------------------------------------------------------------------------------------------------------------------------------------------------------------------------------------------------------------------------------------------------------------------------------------------------------------------------------------------------------------------------------------------------------------------------------------------------------------------------------------------------------------------------------------------------------------------------------------------------------------------------------------------------------------------------------------------------------------------------------------------------------------------------------------------------------------------------------------------------------------------------------------------------------------------------------------------------------------------------------|
|                | <p>audit/ OR audit\$.mp. OR (diagnos\$ adj3 mistak\$).mp. OR (medication\$ adj3 mistak\$).mp. OR (drug\$ adj3 mistak\$).mp. OR (surgic\$ adj3 mistak\$).mp. OR (program\$ adj3 hazard\$ adj3 surveillance\$).mp. OR (management\$ adj3 safety\$).mp. OR (hazard\$ adj3 control\$).mp. OR (hazard\$ adj3 management\$).mp. OR malpractic\$.mp. OR negligen\$.mp. OR exp Morbidity/ OR morbidity\$.mp. OR exp postoperative complication/ OR (postoperative\$ adj3 complication\$).mp. OR exp Cross Infection/ OR (nosocomial\$ adj3 infection\$).mp. OR (hospital\$ adj3 infection\$).mp. OR (cross\$ adj3 infection\$).mp. OR exp clinical practice/ OR exp professional practice/ OR (practice\$ adj3 pattern\$ adj3 clinical\$).mp. OR (practice\$ adj3 pattern\$ adj3 physicians\$).mp. OR (prescribing\$ adj3 pattern\$ adj3 physician\$).mp. OR (practice\$ adj3 pattern\$ adj3 professional\$).mp. OR (practice\$ adj3 pattern\$ adj3 variation\$).mp. OR (practice\$ adj3 clinical\$ adj3 variation\$).mp. OR (practice\$ adj3 medical\$ adj3 variation\$).mp. OR exp mortality/ OR exp death/ OR (rate\$ adj3 age-specific\$ adj3 death\$).mp. OR (rate\$ adj3 death\$).mp. OR (rate\$ adj3 fatalit\$).mp. OR mortality\$.mp. OR exp outcome assessment/ OR (measure\$ adj3 outcome\$).mp. OR (assessment\$ adj3 outcome\$).mp. OR (research\$ adj3 outcome\$).mp. OR (stud\$ adj3 outcome\$).mp. OR (assessment\$ adj3 patient\$ adj3 outcome\$).mp. OR (research\$ adj3 patient\$ adj3 outcome\$).mp. OR exp risk reduction/ OR exp high risk behavior/ OR exp "root cause analysis"/ OR (cause\$ adj3 root\$ adj3 analys\$).mp. OR exp adverse drug reaction/ OR (drug\$ adj3 side\$ adj3 effect\$).mp. OR (drug\$ adj3 toxic\$).mp. OR (drug\$ adj3 reaction\$ adj3 adverse\$).mp. OR (drug\$ adj3 event\$ adj3 adverse\$).mp. OR ae.fs. [adverse drug reaction] OR to.fs. [drug toxicity] OR dt.fs. [drug interaction subheading] OR si.fs. [side effect subheading] OR co.fs. [complication subheading]</p> |
| Web of Science | <p>[burn out* OR burnout*] AND [physician* OR clinician* OR psychiatry* OR allergist* OR anesthesiologist* OR cardiologist* OR clinical pharmacologist* OR clinical toxicologist* OR dermatologist* OR doctor* OR endocrinologist* OR gastroenterologist* OR gynecologist* OR hematologist* OR immunologist* OR medical biochemist* OR medical geneticist* OR medical microbiologist* OR nephrologist* OR neurologist* OR neuropathologist* OR neuroradiologist* OR occupational physician* OR oncologist* OR ophthalmologist* OR pathologist* OR pediatrician* OR physician* OR psychiatrist* OR radiologist* OR rheumatologist* OR surgeon* OR urologist* OR consultant*] AND [error* OR health* care* OR healthcare* OR quality* OR misdiag* OR mistak* OR competenc* OR expertis* OR professionalism* OR outcome* OR impair* OR disruptive* OR safe* OR risk* OR satisf* OR relation* OR contact* OR communicat* OR misinform* OR attitude* OR skill* OR care* OR empath* OR standard* OR audit* OR hazard* OR malpractic* OR negligen* OR morbidity* OR infection* OR practice* pattern* OR prescrib* pattern* OR mortality* OR death* OR fatalit* OR drug* OR adverse* OR poison* OR toxic* OR injur*]</p>                                                                                                                                                                                                                                                                                                                                                                                                                                                                                                                                                                                                                                                                                                                                                                                                          |



### Risk of Bias Assessment Checklist

| Author(s)                                   | 1 | 2 | 3 | 4 | 5 | 6 | 7 | 8 | 9 | Total Score |
|---------------------------------------------|---|---|---|---|---|---|---|---|---|-------------|
| Anagnostopoulos et al. (2012) <sup>31</sup> | 0 | 1 | 1 | 1 | 1 | 1 | 1 | 1 | 0 | 7           |
| Halbesleben et al. (2008) <sup>32</sup>     | 0 | 0 | 1 | 0 | 1 | 1 | 1 | 1 | 0 | 5           |
| Hayashino et al. (2012) <sup>30</sup>       | 0 | 1 | 1 | 0 | 1 | 1 | 1 | 1 | 1 | 7           |
| Klein et al. (2010) <sup>5</sup>            | 1 | 0 | 1 | 0 | 1 | 1 | 1 | 1 | 0 | 6           |
| Rabatin et al. (2016) <sup>29</sup>         | 1 | 0 | 1 | 0 | 1 | 0 | 1 | 1 | 1 | 6           |
| Ratanawongsa et al. (2008) <sup>33</sup>    | 0 | 1 | 0 | 1 | 1 | 1 | 1 | 1 | 0 | 6           |
| Shanafelt et al. (2010) <sup>42</sup>       | 0 | 1 | 0 | 0 | 1 | 1 | 1 | 1 | 0 | 5           |
| Shirom et al. (2006) <sup>43</sup>          | 0 | 0 | 1 | 0 | 1 | 1 | 1 | 1 | 0 | 5           |
| Travado et al. (2005) <sup>34</sup>         | 0 | 1 | 0 | 0 | 1 | 1 | 0 | 1 | 0 | 4           |
| Weigl et al. (2015) <sup>45</sup>           | 0 | 1 | 1 | 0 | 1 | 1 | 1 | 1 | 0 | 6           |
| Wen et al. (2016) <sup>46</sup>             | 0 | 0 | 1 | 0 | 1 | 1 | 1 | 0 | 0 | 4           |
| Weng et al. (2011) <sup>35</sup>            | 0 | 1 | 0 | 1 | 1 | 1 | 0 | 1 | 0 | 5           |

### Risk of Bias Assessment Criteria

1. Study population is well described to facilitate understanding about the generalizability of the results based on the study sample (e.g., age, sex, location of the study, physician specialty, practice location)
2. Data collection methods that address the risk of bias are described
3. Participation/response rate was at least 50% on average
4. The psychometric properties of the quality of care outcome measure have been tested
5. Statistical method was appropriate for the question being answered
6. Statistical significance of associations were tested and reported
7. Study controlled for at least one confounder such as sex or age in the analyses
8. Physician matched with patient
9. Longitudinal data was used

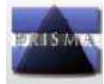

# PRISMA 2009 Checklist

| Section/topic                      | #  | Checklist item                                                                                                                                                                                                                                                                                              | Reported on page #   |
|------------------------------------|----|-------------------------------------------------------------------------------------------------------------------------------------------------------------------------------------------------------------------------------------------------------------------------------------------------------------|----------------------|
| <b>TITLE</b>                       |    |                                                                                                                                                                                                                                                                                                             |                      |
| Title                              | 1  | Identify the report as a systematic review, meta-analysis, or both.                                                                                                                                                                                                                                         | 1                    |
| <b>ABSTRACT</b>                    |    |                                                                                                                                                                                                                                                                                                             |                      |
| Structured summary                 | 2  | Provide a structured summary including, as applicable: background; objectives; data sources; study eligibility criteria, participants, and interventions; study appraisal and synthesis methods; results; limitations; conclusions and implications of key findings; systematic review registration number. | 2                    |
| <b>INTRODUCTION</b>                |    |                                                                                                                                                                                                                                                                                                             |                      |
| Rationale                          | 3  | Describe the rationale for the review in the context of what is already known.                                                                                                                                                                                                                              | 4-5                  |
| Objectives                         | 4  | Provide an explicit statement of questions being addressed with reference to participants, interventions, comparisons, outcomes, and study design (PICOS).                                                                                                                                                  | 4-5                  |
| <b>METHODS</b>                     |    |                                                                                                                                                                                                                                                                                                             |                      |
| Protocol and registration          | 5  | Indicate if a review protocol exists, if and where it can be accessed (e.g., Web address), and, if available, provide registration information including registration number.                                                                                                                               | N/A                  |
| Eligibility criteria               | 6  | Specify study characteristics (e.g., PICOS, length of follow-up) and report characteristics (e.g., years considered, language, publication status) used as criteria for eligibility, giving rationale.                                                                                                      | 7-9                  |
| Information sources                | 7  | Describe all information sources (e.g., databases with dates of coverage, contact with study authors to identify additional studies) in the search and date last searched.                                                                                                                                  | 7                    |
| Search                             | 8  | Present full electronic search strategy for at least one database, including any limits used, such that it could be repeated.                                                                                                                                                                               | 7-11<br>Supp. File 1 |
| Study selection                    | 9  | State the process for selecting studies (i.e., screening, eligibility, included in systematic review, and, if applicable, included in the meta-analysis).                                                                                                                                                   | 11-12                |
| Data collection process            | 10 | Describe method of data extraction from reports (e.g., piloted forms, independently, in duplicate) and any processes for obtaining and confirming data from investigators.                                                                                                                                  | N/A                  |
| Data items                         | 11 | List and define all variables for which data were sought (e.g., PICOS, funding sources) and any assumptions and simplifications made.                                                                                                                                                                       | 11-12                |
| Risk of bias in individual studies | 12 | Describe methods used for assessing risk of bias of individual studies (including specification of whether this was done at the study or outcome level), and how this information is to be used in any data synthesis.                                                                                      | 12                   |
| Summary measures                   | 13 | State the principal summary measures (e.g., risk ratio, difference in means).                                                                                                                                                                                                                               | N/A                  |
| Synthesis of results               | 14 | Describe the methods of handling data and combining results of studies, if done, including measures of consistency (e.g., $I^2$ ) for each meta-analysis.                                                                                                                                                   | N/A                  |



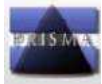

# PRISMA 2009 Checklist

| Section/topic                 | #  | Checklist item                                                                                                                                                                                           | Reported on page # |
|-------------------------------|----|----------------------------------------------------------------------------------------------------------------------------------------------------------------------------------------------------------|--------------------|
| Risk of bias across studies   | 15 | Specify any assessment of risk of bias that may affect the cumulative evidence (e.g., publication bias, selective reporting within studies).                                                             | 12                 |
| Additional analyses           | 16 | Describe methods of additional analyses (e.g., sensitivity or subgroup analyses, meta-regression), if done, indicating which were pre-specified.                                                         | N/A                |
| <b>RESULTS</b>                |    |                                                                                                                                                                                                          |                    |
| Study selection               | 17 | Give numbers of studies screened, assessed for eligibility, and included in the review, with reasons for exclusions at each stage, ideally with a flow diagram.                                          | 11, Fig. 1         |
| Study characteristics         | 18 | For each study, present characteristics for which data were extracted (e.g., study size, PICOS, follow-up period) and provide the citations.                                                             | 12-22, Table 1     |
| Risk of bias within studies   | 19 | Present data on risk of bias of each study and, if available, any outcome level assessment (see item 12).                                                                                                | 12, Supp. File 2   |
| Results of individual studies | 20 | For all outcomes considered (benefits or harms), present, for each study: (a) simple summary data for each intervention group (b) effect estimates and confidence intervals, ideally with a forest plot. | 22-26, Table 2     |
| Synthesis of results          | 21 | Present results of each meta-analysis done, including confidence intervals and measures of consistency.                                                                                                  | N/A                |
| Risk of bias across studies   | 22 | Present results of any assessment of risk of bias across studies (see Item 15).                                                                                                                          | 12, Fig. 2         |
| Additional analysis           | 23 | Give results of additional analyses, if done (e.g., sensitivity or subgroup analyses, meta-regression [see Item 16]).                                                                                    | N/A                |
| <b>DISCUSSION</b>             |    |                                                                                                                                                                                                          |                    |
| Summary of evidence           | 24 | Summarize the main findings including the strength of evidence for each main outcome; consider their relevance to key groups (e.g., healthcare providers, users, and policy makers).                     | 26-27              |
| Limitations                   | 25 | Discuss limitations at study and outcome level (e.g., risk of bias), and at review-level (e.g., incomplete retrieval of identified research, reporting bias).                                            | 27-29              |
| Conclusions                   | 26 | Provide a general interpretation of the results in the context of other evidence, and implications for future research.                                                                                  | 30                 |
| <b>FUNDING</b>                |    |                                                                                                                                                                                                          |                    |
| Funding                       | 27 | Describe sources of funding for the systematic review and other support (e.g., supply of data); role of funders for the systematic review.                                                               | 31                 |

From: Moher D, Liberati A, Tetzlaff J, Altman DG, The PRISMA Group (2009). Preferred Reporting Items for Systematic Reviews and Meta-Analyses: The PRISMA Statement. PLoS Med 6(6): e1000097. doi:10.1371/journal.pmed1000097

For more information, visit: [www.prisma-statement.org](http://www.prisma-statement.org).

# BMJ Open

## The Relationship between Physician Burnout and Quality of Healthcare in terms of Safety and Acceptability – A Systematic Review

|                                 |                                                                                                                                                                                                                                                                                                                                                                                                                                                   |
|---------------------------------|---------------------------------------------------------------------------------------------------------------------------------------------------------------------------------------------------------------------------------------------------------------------------------------------------------------------------------------------------------------------------------------------------------------------------------------------------|
| Journal:                        | <i>BMJ Open</i>                                                                                                                                                                                                                                                                                                                                                                                                                                   |
| Manuscript ID                   | bmjopen-2016-015141.R2                                                                                                                                                                                                                                                                                                                                                                                                                            |
| Article Type:                   | Research                                                                                                                                                                                                                                                                                                                                                                                                                                          |
| Date Submitted by the Author:   | 24-Mar-2017                                                                                                                                                                                                                                                                                                                                                                                                                                       |
| Complete List of Authors:       | Dewa, C; University of California Davis School of Medicine, Dept of Psychiatry and Behavioral Sciences<br>Loong, Desmond; Centre for Addiction and Mental Health, Centre for Research on Employment and Workplace Health<br>Bonato, Sarah; Centre for Addiction and Mental HealthCentre for Addiction and Mental Health, Library Services<br>Trojanowski, Lucy; Centre for Addiction and Mental HealthCentre for Addiction and Mental Health, SER |
| <b>Primary Subject Heading</b>: | Mental health                                                                                                                                                                                                                                                                                                                                                                                                                                     |
| Secondary Subject Heading:      | Health policy, Health services research                                                                                                                                                                                                                                                                                                                                                                                                           |
| Keywords:                       | burnout, physicians, quality of care                                                                                                                                                                                                                                                                                                                                                                                                              |
|                                 |                                                                                                                                                                                                                                                                                                                                                                                                                                                   |

SCHOLARONE™  
Manuscripts

Only

1  
2  
3 **The Relationship between Physician Burnout and Quality of Healthcare in terms of Safety**  
4 **and Acceptability – A Systematic Review**  
5  
6

7  
8 Carolyn S. Dewa <sup>1,2§</sup>, Desmond Loong <sup>2</sup>, Sarah Bonato <sup>3</sup>, Lucy Trojanowski <sup>2</sup>  
9

10  
11 <sup>1</sup>University of California, Davis, Department of Psychiatry and Behavioral Sciences, Grange  
12 Building, 2103 Stockton Boulevard, Sacramento, California 95817, USA

13 <sup>2</sup>Centre for Addiction and Mental Health, Centre for Research on Employment and Workplace  
14 Health, 33 Russell Street, Toronto, M5S 2S1, Canada

15 <sup>3</sup>Library Services, Centre for Addiction and Mental Health, 33 Russell Street, Toronto, M5S 2S1,  
16 Canada  
17  
18

19 §Corresponding author:

20 Carolyn S. Dewa, MPH, PhD  
21 Professor, University of California, Davis  
22 Department of Psychiatry and Behavioral Sciences  
23 Grange Building, 2103 Stockton Boulevard  
24 Sacramento, California 95817 USA  
25 (916) 703-5656  
26 e-mail: csdewa@ucdavis.edu  
27  
28  
29  
30

31 Keywords: burnout, physicians, quality of healthcare  
32

33 Word count: 5,430

34 Number of figures: 2

35 Number of tables: 1

36 Number of references: 64

37 Number of supplementary files: 3  
38  
39  
40  
41  
42  
43  
44  
45  
46  
47  
48  
49  
50  
51  
52  
53  
54  
55  
56  
57  
58  
59  
60

## The Relationship between Physician Burnout and Quality of Healthcare in terms of Safety and Acceptability – A Systematic Review

### Abstract

**Objectives.** This study reviews the current state of the published peer-reviewed literature related to physician burnout and two quality of care dimensions. The purpose of this systematic literature review is to address the question, “How does physician burnout affect the quality of healthcare related to the dimensions of acceptability and safety?”

**Design.** Using a multi-phase screening process, this systematic literature review is based on publically available peer-reviewed studies published between 2002-2017. Six electronic databases were searched: (1) *Medline Current*, (2) *Medline In-process*, (3) *Medline Epub Ahead of Print*, (4) *PsycINFO*, (5) *Embase*, and (6) *Web of Science*.

**Setting.** Physicians practicing in civilian settings.

**Participants.** Practicing physicians who have completed training.

**Primary and secondary outcome measures.** Quality of healthcare related to acceptability (i.e., patient satisfaction, physician communication, physician attitudes) and safety (i.e., minimizing risks or harm to patients)

**Results.** 4,114 unique citations were identified. Of these, 12 articles were included in the review. Two studies were rated as having high risk of bias and 10 as having moderate risk. Four studies were conducted in North America; four in Europe, one in the Middle East, and three in East Asia. Results of this systematic literature review suggest there is moderate evidence that burnout is associated with safety-related quality of care. Because of the variability in the way patient acceptability-related quality of care was measured and the inconsistency in study findings, the evidence supporting the relationship between burnout and patient acceptability-related quality of care is less strong.

**Conclusions.** The focus on direct care-related quality highlights additional ways that physician burnout affects the healthcare system. These studies can help to inform decisions about how to improve patient care by addressing physician burnout. Continued work looking at the relationship between dimensions of acceptability-related quality of care measures and burnout is needed to advance the field.

## ARTICLE SUMMARY

### STRENGTHS AND LIMITATIONS OF THIS STUDY:

- Few studies have examined the current state of knowledge about the relationship between physician burnout and the patient safety and acceptability dimensions of quality of care.
- This systematic literature review employed a broad search of six electronic databases: (1) *Medline Current*, (2) *Medline In-process*, (3) *Medline Epub Ahead of Print*, (4) *PsycINFO*, (5) *Embase*, and (6) *Web of Science*. A manual search was also conducted. In total, 4,114 unique citations were identified and reviewed by three reviewers in pairs.
- We used a comprehensive search strategy that follows the recommended best practices of incorporating adjacency commands and synonyms for keywords.
- One of the limitations of the search strategy employed in this systematic review is its focus on English-language publications.
- Another potential limitation of the search strategy is the focus on published peer-reviewed articles. In doing so, our results may be subject to publication bias.

## **The Relationship between Physician Burnout and Quality of Healthcare in terms of Safety and Acceptability – A Systematic Review**

Reports from around the world indicate that about one-third to one-half of physicians experience at least one dimension of burnout.<sup>1-5</sup> Burnout has been conceptualized as a syndrome consisting of three dimensions: emotional exhaustion (EE), depersonalization (DP) and low personal accomplishment (PA).<sup>6</sup> Maslach et al.<sup>7</sup> define EE as referring to “feelings of being overextended and depleted of one’s emotional and physical resources.” DP is also referred to as cynicism and defined as “a negative, callous, or excessively detached response to various aspects”.<sup>7</sup> PA is also referred to as professional efficacy and “it refers to feelings of incompetence and a lack of achievement and productivity at work”.<sup>7</sup> Burnout has been observed to affect personal well-being through low job satisfaction<sup>8-10</sup> and decreased mental health.<sup>11</sup>

Because physicians play an integral role in the healthcare system, the effects of physician burnout are not limited to the physicians experiencing it. Rather, physician burnout potentially impacts the entire healthcare system. For example, a recent systematic literature review reported a negative relationship between burnout and productivity (i.e., early retirement, work cutback, and quitting).<sup>12</sup> The impact of productivity loss related to burnout could lead to fewer available healthcare resources that in turn, can result in healthcare service waitlists. One estimate of the costs of physician work cutback and early retirement related to burnout suggests it totals to at least CAD \$213 million in patient services losses.<sup>8</sup>

This raises another question about physicians who continue to practice despite experiencing burnout. Does burnout affect their practice? There is evidence that physician burnout is also related to decreased quality of patient care.<sup>5</sup> The World Health Organization (WHO)<sup>13</sup> and the Institute of Medicine (IOM)<sup>14</sup> suggest that there are six dimensions for quality of healthcare: effectiveness, efficiency, accessibility, equitability, acceptability, and safety.

1  
2  
3 The purpose of this systematic literature review is to address the question, “How does  
4 physician burnout affect the quality of healthcare related to the dimensions of acceptability and  
5 safety?” In this review, we focus on two dimensions of quality – acceptability (i.e., patient  
6 satisfaction, perceived quality of care, and communication) and safety (i.e., minimizing risks or  
7 harm to patients). We choose these two dimensions because they reflect the quality of patient-  
8 physician interactions.<sup>15</sup> That is, if a clinician’s wellbeing is compromised, their patient  
9 interactions may also be negatively affected.<sup>16</sup> In contrast, effectiveness, efficiency,  
10 accessibility, equitability reflect the systems (i.e., infrastructure, information technology,  
11 payment policies) in which practice is conducted.<sup>14</sup>

## 23 **Background**

24  
25  
26 There has been growing interest in the relationship between healthcare professional  
27 wellbeing and quality of patient care. Although the WHO<sup>13</sup> and IOM<sup>14</sup> identify six dimensions  
28 of quality of healthcare, attention has focused on the dimension of patient safety. Recently, there  
29 have been four published reviews that focus on the relationship between healthcare professional  
30 wellbeing and patient safety.<sup>17-20</sup> For example, Hall et al.<sup>18</sup> consider healthcare staff wellbeing  
31 and Salyers et al.<sup>20</sup> examine staff burnout as opposed to specifically examining physician  
32 burnout as our review does. de Jong et al.<sup>17</sup> examine common mental disorders as opposed to  
33 burnout. Williams and Skinner<sup>19</sup> look at physician satisfaction rather than burnout. Each of  
34 these published reviews answer questions that are different from the one addressed in our review.  
35 Because they seek to answer different questions, they employ search strategies and  
36 inclusion/exclusion criteria that are different from those used in our review. Consequently, they  
37 include different articles. For example, Hall et al.’s<sup>18</sup> review does not include nine articles that  
38 are included in our systematic review. Among these, there are six articles related to  
39  
40  
41  
42  
43  
44  
45  
46  
47  
48  
49  
50  
51  
52  
53  
54  
55  
56  
57  
58  
59  
60

1  
2  
3 acceptability and three articles related to patient safety that were not included in Hall et al.'s<sup>18</sup>  
4  
5 review. In comparison to de Jong et al.'s review,<sup>17</sup> our review has six articles on acceptability  
6  
7 and five on patient safety that are unique to our systematic review. None of the articles included  
8  
9 in our review were included in Williams and Skinner's.<sup>19</sup> Compared to the papers included in  
10  
11 Salyers et al.'s<sup>20</sup> review, there are four papers related to physician burnout and safety that are  
12  
13 unique to our review and two focused on acceptability that are unique to our review. Thus, our  
14  
15 review includes papers that have not been considered together to look at quality of care related to  
16  
17 physician interactions with patients and the impact of burnout on physicians.  
18  
19

20  
21 In addition, none of the published reviews considers the quality of care dimension of  
22  
23 acceptability for physicians who have completed training. Yet, along with patient safety, this  
24  
25 dimension reflects the quality of interactions between providers and patients. The physician-  
26  
27 patient interactions are one of the fundamental interactions in healthcare.<sup>15,19</sup> Furthermore, the  
28  
29 IOM<sup>14</sup> asserts that the rise in chronic illnesses necessitates quality interactions to enhance the  
30  
31 collaboration between the physician and patient. Quality of physician-patient interactions is  
32  
33 reflected in communication, perceived quality of care, and patient satisfaction.<sup>14,15</sup> It is the  
34  
35 physician-patient interaction that supports the collaboration that will lead to better patient  
36  
37 outcomes.<sup>15</sup>  
38  
39

40  
41  
42 Wallace et al.<sup>16</sup> assert that physician wellbeing could be used as a quality indicator. The  
43  
44 argument could be strengthened by also understanding how wellbeing is associated with the  
45  
46 physician-patient interaction-related quality dimensions of safety and acceptability. In particular,  
47  
48 burnout could be a focus because it reflects wellbeing and there are standardized measures to  
49  
50 identify it. Furthermore, it is a facet of wellbeing that can be influenced by organizational  
51  
52 factors and is under the influence of the healthcare system.<sup>16,21,22</sup> Thus, this systematic review of  
53  
54  
55  
56  
57  
58  
59  
60



1  
2  
3 the literature extends our knowledge about the dimensions of quality of care that reflect  
4  
5 physician interactions with patients and a dimension of wellbeing that is affected by the work  
6  
7 environment.  
8  
9

## 11 12 **METHODS**

13  
14 A systematic review of the literature was reported following the *Preferred Reporting*  
15  
16 *Items for Systematic Reviews and Meta-Analyses* (PRISMA) guidelines (Supplementary File 1:  
17  
18 PRISMA Checklist).<sup>23</sup> Ethics board review was not sought because this review relied solely on  
19  
20 publicly available sources of information.  
21  
22

### 23 24 **Information Sources**

25  
26 Six databases were searched: (1) *Medline Current* (index of biomedical research and  
27  
28 clinical sciences journal articles); (2) *Medline In-Process* (index of biomedical research and  
29  
30 clinical sciences journal articles awaiting to be indexed into *Medline Current*); (3) *Medline Epub*  
31  
32 *Ahead of Print* (index of articles that appear on publisher websites in advance of the journal  
33  
34 release) (4) *PsycINFO* (an index of journal articles, books, chapters, and dissertations in  
35  
36 psychology, social sciences, behavioral sciences, and health sciences); (5) *Embase* (index of  
37  
38 biomedical research, and abstracts from biomedical, drug and medical device conferences); and  
39  
40 (6) *Web of Science* (index of journal articles, editorially selected books and conference  
41  
42 proceedings in life sciences and biomedical research).  
43  
44  
45

### 46 47 **Search Strategy**

48  
49 Collaborating with the professional health science librarian (SB) member of this research  
50  
51 team, search strategies were developed and tailored for each database following the Peer Review  
52  
53 of Electronic Search Strategies (PRESS) guidelines<sup>24</sup> (Supplementary File 2: Search terms used  
54  
55  
56  
57  
58  
59

1  
2  
3 in search strategy). Because recommended guidelines were used for this review's search  
4 strategies, the search strategy that we used is also a contribution to the literature. As this  
5 literature grows, the strategy can be used in future searches on the topic. The searches were  
6 conducted in February 2017. The OVID platform was used to search *Medline Current*, *Medline*  
7 *In-Process*, *Medline Epub Ahead of Print*, *PsycINFO*, and *Embase*. *Web of Science* was  
8 searched using the Thomson Reuters search interface. The search period covered January 2002 –  
9 February 2017; all searches were limited to English language journals. The time frame was  
10 chosen to represent the current healthcare environments in which physicians are practicing. For  
11 example, the year 2002 was the year after the Institute of Medicine's report<sup>14</sup> on the quality of  
12 healthcare that discussed the six dimensions of quality of care. By beginning in 2002, we have  
13 allowed for a one year lag after publication of this report during which healthcare settings and  
14 researchers could have incorporated the Institute of Medicine's quality of healthcare framework  
15 into their work.  
16  
17  
18  
19  
20  
21  
22  
23  
24  
25  
26  
27  
28  
29  
30  
31

32  
33 Our searches sought to identify articles about practicing physicians regardless of  
34 specialty working in civilian settings (i.e., non-military settings). In this review, the physician  
35 search included: allergists, anesthesiologists, cardiologists, clinical pharmacologists, clinical  
36 toxicologists, dermatologists, doctors, endocrinologists, gastroenterologists, gynecologists,  
37 hematologists, immunologists, medical biochemists, medical geneticists, medical  
38 microbiologists, nephrologists, neurologists, neuropathologists, neuroradiologists, occupational  
39 physicians, oncologists, ophthalmologists, pathologists, pediatricians, physicians, psychiatrists,  
40 radiologists, rheumatologists, surgeons, and urologists. The search strategy did not seek to  
41 exclude residents and medical students. Rather, a broad search strategy was employed to  
42  
43  
44  
45  
46  
47  
48  
49  
50  
51  
52  
53  
54  
55  
56  
57  
58  
59  
60

1  
2  
3 increase the likelihood that all studies on physician burnout would be found. The reference lists  
4  
5 of all accepted full-text articles were hand searched.  
6

### 7 8 **Screening process**

9  
10 Relevant articles were identified using a multi-phase screening process that involved  
11  
12 reviewer pairs using the inclusion and exclusion criteria for this review. In the first step, titles  
13  
14 were screened. Next, abstracts of the articles that remained after the first step were screened.  
15  
16 The final step of the process involved screening the full text of all articles that passed the first  
17  
18 and second phases. In the full text screening, papers for which there was insufficient information  
19  
20 in the title and abstract to determine relevancy were also included. Two pairs of reviewers (CSD  
21  
22 and LT, CSD and DL) independently completed the multi-phase screening process. The inter-  
23  
24 rater reliability corrected for chance<sup>25</sup> between CSD & LT and CSD & DL was  $\kappa = 0.96$  and  $\kappa =$   
25  
26 0.98, respectively. Before moving onto each stage, disagreements were discussed until  
27  
28 consensus was reached.  
29  
30  
31

32  
33 For this review, burnout was defined as a syndrome of emotional exhaustion, cynicism  
34  
35 (depersonalization) and reduced feelings of personal accomplishment related to work.<sup>6</sup> Quality  
36  
37 of care related to acceptability was identified with measures reflecting physician-patient  
38  
39 interactions such as patient satisfaction, perceived quality of care, physician communication with  
40  
41 patients, and physician attitudes towards patients. In addition, safety was identified by measures  
42  
43 that reflected risks or harm to patients such as medical errors.  
44  
45  
46

47 Study inclusion criteria were:

- 49 1. Studies reported quality of care outcomes related to acceptability and/or safety
- 50 2. The sample population was comprised of practicing physicians regardless of  
51 specialty who worked in civilian settings. That is, the results were reported such  
52  
53  
54  
55  
56  
57  
58  
59  
60

1  
2  
3 that the practicing physician (as opposed to resident) outcomes were reported  
4 separately.

- 5  
6  
7 3. Burnout was assessed based on a psychometrically validated measure  
8  
9 4. Paper reports original research

10 Exclusion criteria were:

- 11  
12  
13 1. The study sample was comprised only of residents and medical students  
14  
15 2. The study did not examine the relationship between burnout and one of the two  
16 quality of care dimensions  
17  
18 3. Burnout was not assessed based on a validated measure  
19  
20 4. The paper was a review article or commentary

### 21 **Risk of Bias Assessment**

22  
23  
24 All included articles were assessed for risk of bias by both pairs of reviewers (CSD &  
25 LT, and CSD & DL). Disagreements between the pairs of reviewers were discussed until  
26  
27 consensus was reached.  
28  
29

30  
31 To assess the risk of bias in observational studies, Sanderson et al.<sup>26</sup> recommend the use  
32  
33 of a transparent checklist that concentrates on the “few, principal, and potential sources of bias in  
34 a study’s findings”. They assert that the fundamental domains should include: (1) the  
35 appropriate selection of participants, (2) appropriate measurement of variables, and (3)  
36  
37 appropriate control of confounding. In accordance with their recommendations and the  
38  
39 Strengthening of Observational Studies in Epidemiology (STROBE) criteria,<sup>27</sup> a 9-item risk of  
40  
41 bias checklist with the following criteria adapted from Lagerveld et al.<sup>28</sup> was used:  
42  
43  
44  
45

- 46  
47 1. Study population is well described to facilitate understanding about the  
48 generalizability of the results based on the study sample (e.g., age, sex, location of  
49 the study, physician specialty, practice location)  
50  
51  
52 2. Data collection methods that address the risk of bias are described  
53  
54 3. Participation/response rate was at least 50% on average  
55  
56  
57  
58  
59  
60

- 1
- 2
- 3
- 4 4. The psychometric properties of the quality of care outcome measure have been
- 5 tested
- 6
- 7 5. Statistical method was appropriate for the question being answered
- 8
- 9 6. Statistical significance of associations were tested and reported
- 10
- 11 7. Study controlled for at least one confounder such as sex or age in the analyses
- 12
- 13 8. Physician matched with patient
- 14
- 15 9. Longitudinal data was used

16 Each item was scored “1” if the criterion had been met. Each article could achieve a maximum  
17 score of 9. Based on their total score, articles were categorized either as low (8-9 points),  
18 moderate (5-7 points), or high risk of bias (1-4 points).  
19  
20  
21

## 22 **RESULTS**

### 23 **Article Inclusion and Exclusion Results**

24  
25  
26  
27 The electronic literature search resulted in the identification of 4,114 unique citations  
28 (Figure 1). Based on the title review, 4,020 citations were excluded; this left 94 articles for  
29 abstract review. During the abstract review, another 28 citations were excluded; this left 66  
30 articles for full-text review. Reasons for article exclusions at full text review were: (1) not a  
31 relevant outcome (n = 10), (2) sample not comprised of physicians/cannot distinguish physicians  
32 as a group from other clinicians (n = 15), (3) it was not original research (n = 20), (4) burnout not  
33 measured with a validated instrument (n = 1), and (5) not published in a peer-reviewed journal (n  
34 = 8). After the full-text review, 12 articles remained and their reference lists were hand searched  
35 for relevant studies. The hand search identified six additional citations; all six were excluded at  
36 full-text review.  
37  
38  
39  
40  
41  
42  
43  
44  
45  
46  
47  
48  
49

50  
51 -----  
52 Insert Figure 1  
53 -----  
54

### 55 **Risk of Bias Assessment Results**

1  
2  
3 Our assessment indicated 10 of the 12 studies were of moderate risk of bias; two were of  
4 high risk of bias. Figure 2 illustrates the limitations of these studies. Two studies  
5 comprehensively<sup>5,29</sup> described the study population from which the study sample was drawn.  
6  
7 Two studies used longitudinal data.<sup>29,30</sup> Other limitations involved not reporting the response  
8 rate<sup>31-34</sup> and not controlling for possible confounding factors in the statistical analyses.<sup>34,35</sup> There  
9 was also variability in the use of validated outcome measures; only three studies used validated  
10 instruments to measure their outcomes.<sup>31,33,35</sup> All included studies employed appropriate  
11 statistical tests. All but one<sup>29</sup> reported the results of the statistical testing (Supplementary File 3:  
12 Risk of Bias Assessment Checklist).  
13  
14  
15  
16  
17  
18  
19  
20  
21  
22

23  
24 -----  
25 Insert Figure 2  
26 -----  
27

### 28 **Overview of the Studies**

29  
30 Of the 12 studies that met the inclusion criteria (Table 1), four were conducted in the US,  
31 two in Germany, one each in Greece, Israel, Japan, China, and Taiwan. There was one multi-  
32 national study based on data from Italy, Spain, and Portugal.  
33  
34  
35  
36  
37  
38  
39  
40  
41  
42  
43  
44  
45  
46  
47  
48  
49  
50  
51  
52  
53  
54  
55  
56  
57  
58  
59  
60

Table 1. Study Descriptions and Reported Patient Safety and Acceptability Related Quality of Care Outcomes

| Author(s)                                             | Study Population                                                                                                                                                                                                                                                  | Description of Sample                                                                                                                                                                                                                                                         | Burnout Measure                                                                                                           | Quality of Care Measure                                                                                                                                                                                                                                                                                                                                                                                                                                                                                                                                    | Quality of Care Outcomes |                                                                                                                                                                                                                                                                                                                                                                 |                         |
|-------------------------------------------------------|-------------------------------------------------------------------------------------------------------------------------------------------------------------------------------------------------------------------------------------------------------------------|-------------------------------------------------------------------------------------------------------------------------------------------------------------------------------------------------------------------------------------------------------------------------------|---------------------------------------------------------------------------------------------------------------------------|------------------------------------------------------------------------------------------------------------------------------------------------------------------------------------------------------------------------------------------------------------------------------------------------------------------------------------------------------------------------------------------------------------------------------------------------------------------------------------------------------------------------------------------------------------|--------------------------|-----------------------------------------------------------------------------------------------------------------------------------------------------------------------------------------------------------------------------------------------------------------------------------------------------------------------------------------------------------------|-------------------------|
|                                                       |                                                                                                                                                                                                                                                                   |                                                                                                                                                                                                                                                                               |                                                                                                                           |                                                                                                                                                                                                                                                                                                                                                                                                                                                                                                                                                            | Medical Errors (ME)      | Patient Satisfaction (PS)/Quality of Care (QoC)                                                                                                                                                                                                                                                                                                                 | Communication/Attitudes |
| Anagnostopoulos et al. (2012) <sup>31</sup><br>Greece | Physicians working in three large primary health care centers.<br>Patients of participating physicians. Patients selected through systematic random sampling – 1:3 consecutive patients.<br>Physician response rate: 85.8%<br>Patient response rate: Not reported | n = 30 physicians<br>≤ 10 years practicing: 53%<br>Specialties:<br>General practitioners: 63%<br>Pathologists/internists: 23.3%<br>Male: n = 17<br>Female: n = 13<br>> 50 yrs: 43%<br>26–50 yrs: 40%<br>n = 300 patients<br>Male: 46%<br>Female: 54%<br>Mean age: 54 ± 15 yrs | Greek translation of the 22-item Maslach Burnout Inventory–Human Services Survey                                          | Patient report:<br>Patient satisfaction assessed using 18-item Consultation Satisfaction Questionnaire. <sup>36</sup><br>5-point Likert scale from 1 = “strongly agree” to 5 = “strongly disagree”.<br>Satisfaction sub-scales: (1) General, (2) Perceived length of consultation, (3) Depth of relationship, (4) Professional care provided<br>Overall satisfaction: sum of all items (max score = 90)<br>Scale was translated into Greek using back-translation and pilot testing.<br>English version’s psychometric properties tested. <sup>36,37</sup> |                          | Correlation btwn Maslach Burnout Inventory (MBI) dimensions and PS:<br>• EE & PS: r = -0.64, p<0.01<br>• DP & PS: r = -0.54, p<0.01<br>• PA & PS: r = 0.26, p=0.17<br>Results of mixed effect model with PS as outcome:<br>• Low EE associated with highest average PS<br>Comparison btwn moderate and high EE no significant difference in association with PS |                         |
| Halbesleben and Rathert (2008) <sup>32</sup><br>USA   | Attending physicians of university students who had been hospitalized in past year.<br>Student response rate: Not reported                                                                                                                                        | n = 178 physicians<br>Yrs practicing: Not reported<br>Specialties: Not reported<br>Male: n = 84<br>Female: n = 94<br>Mean age = 46 ± 13 yrs<br>n = 178 patients<br>Male: n = 98<br>Female: n = 80<br>Mean age: 23 ± 5 yrs                                                     | 22-item Maslach Burnout Inventory–Human Services Survey modified to apply to patients rather than general care recipients | Patient report:<br>Patient satisfaction assessed using 22-item SERVQUAL. <sup>38</sup><br>7-point Likert scale from 1 = “strongly disagree” to 7 = “strong agree”.<br>Psychometric properties tested but subsequent study suggested need for further exploration regarding its validity. <sup>39</sup>                                                                                                                                                                                                                                                     |                          | Correlation btwn MBI dimensions and PS:<br>DP & PS: r = -0.16, p<0.05                                                                                                                                                                                                                                                                                           |                         |

| Author(s)                                      | Study Population                                                                                                                                                                                               | Description of Sample                                                                                                                                            | Burnout Measure                                                                                                                                                                              | Quality of Care Measure                                                                                                                                                                                                                                                         | Quality of Care Outcomes                                                                                                                                                                                                                                                                                                                                                                                                                                                                    |                                                 |                         |
|------------------------------------------------|----------------------------------------------------------------------------------------------------------------------------------------------------------------------------------------------------------------|------------------------------------------------------------------------------------------------------------------------------------------------------------------|----------------------------------------------------------------------------------------------------------------------------------------------------------------------------------------------|---------------------------------------------------------------------------------------------------------------------------------------------------------------------------------------------------------------------------------------------------------------------------------|---------------------------------------------------------------------------------------------------------------------------------------------------------------------------------------------------------------------------------------------------------------------------------------------------------------------------------------------------------------------------------------------------------------------------------------------------------------------------------------------|-------------------------------------------------|-------------------------|
|                                                |                                                                                                                                                                                                                |                                                                                                                                                                  |                                                                                                                                                                                              |                                                                                                                                                                                                                                                                                 | Medical Errors (ME)                                                                                                                                                                                                                                                                                                                                                                                                                                                                         | Patient Satisfaction (PS)/Quality of Care (QoC) | Communication/Attitudes |
| Hayashino et al. (2012) <sup>30</sup><br>Japan | Members of a panel of 6,459 hospital-based physicians recruited through hospital lists and scientific meetings. A randomly selected sub-sample of 1,198 were invited to participate.<br><br>Response rate: 70% | n = 836 physicians<br><br>Yrs practicing: Not reported<br><br>Male: 92%<br>Female: 8%<br><br>28-39 yrs: 23%<br>40-49 yrs: 47%<br>50-59 yrs: 26%<br>60-81 yrs: 4% | 17-item Maslach Burnout Inventory developed for Japanese healthcare professionals based on the MBI-Human Services Survey<br><br>Used burnout thresholds:<br>EE: ≥ 21<br>DP: ≥ 18<br>PA: ≥ 16 | Physician report:<br>Perceived medical errors assessed with questions: "Are you concerned that you have made any major medical mistakes in the last year?" IF "yes", asked about number of medical errors that concerned respondent.<br><br>Psychometric properties not tested. | Association btwn MBI dimensions and any medical error:<br><br>• Significant differences among tertiles for EE (p= 0.026) & DP (p=0.002)<br><br>% with ME by burnout dimension tertile:<br>EE 1 <sup>st</sup> tertile: 27.9%<br>EE 2 <sup>nd</sup> tertile: 38.2%<br>EE 3 <sup>rd</sup> tertile: 33.9%<br><br>DP 1 <sup>st</sup> tertile: 35.0%<br>DP 2 <sup>nd</sup> tertile: 27.8%<br>DP 3 <sup>rd</sup> tertile: 37.2%<br><br>• No significant differences among tertiles for PA (p=0.67) |                                                 |                         |



| Author(s)                                   | Study Population                                                                                                                                                                                                                                                                                          | Description of Sample                                                                                                                                                                                                                                                                               | Burnout Measure                                                                                                                                                                                                                                                                                                                                                                                                                                                                                                                                      | Quality of Care Measure                                                                                                                                                                                                                                                                                                                                                                                                                                                                                                                         | Quality of Care Outcomes                                                                                                                                                                                                          |                                                                                                                                                                                                                                                                               |                         |
|---------------------------------------------|-----------------------------------------------------------------------------------------------------------------------------------------------------------------------------------------------------------------------------------------------------------------------------------------------------------|-----------------------------------------------------------------------------------------------------------------------------------------------------------------------------------------------------------------------------------------------------------------------------------------------------|------------------------------------------------------------------------------------------------------------------------------------------------------------------------------------------------------------------------------------------------------------------------------------------------------------------------------------------------------------------------------------------------------------------------------------------------------------------------------------------------------------------------------------------------------|-------------------------------------------------------------------------------------------------------------------------------------------------------------------------------------------------------------------------------------------------------------------------------------------------------------------------------------------------------------------------------------------------------------------------------------------------------------------------------------------------------------------------------------------------|-----------------------------------------------------------------------------------------------------------------------------------------------------------------------------------------------------------------------------------|-------------------------------------------------------------------------------------------------------------------------------------------------------------------------------------------------------------------------------------------------------------------------------|-------------------------|
|                                             |                                                                                                                                                                                                                                                                                                           |                                                                                                                                                                                                                                                                                                     |                                                                                                                                                                                                                                                                                                                                                                                                                                                                                                                                                      |                                                                                                                                                                                                                                                                                                                                                                                                                                                                                                                                                 | Medical Errors (ME)                                                                                                                                                                                                               | Patient Satisfaction (PS)/Quality of Care (QoC)                                                                                                                                                                                                                               | Communication/Attitudes |
| Klein et al. (2010) <sup>5</sup><br>Germany | Physicians in surgery working in > 100 beds general hospitals with a general surgical and/or gynecological ward.<br><br>Stratified probability sample based on hospital beds.<br><br>Response rates:<br>Hospital level: 53%<br>Physician level: 36%<br>Physicians in participating hospitals: 65%         | n = 1,311 physicians<br><br>Mean yrs practicing: 11 yrs<br><br>Male: 60%<br>Female: 40%<br><br>Mean age = 45 ± 8.5 yrs                                                                                                                                                                              | Copenhagen Burnout Inventory (CBI). Three scales assessing personal, client, and work burnout. This study focused on personal burnout (i.e., degree of physical and psychological fatigue and exhaustion).                                                                                                                                                                                                                                                                                                                                           | Physician report:<br>Perceived quality of care assessed using short version of Chirurgisches Qualitätssiegel. Created three sub-scales: (1) psychosocial care, (2) diagnosis/therapy, (3) quality assurance. 5-point Likert scale from 1 = "very good" to 5 = "bad".<br><br>Two questions about frequency of diagnostic and therapeutic errors: "I have made mistakes in diagnosis." and "I have made mistakes in treatment." 4-point Likert scale ("never" to "often").<br><br>Psychometric properties not tested for either set of questions. | Adjusted* Odds Ratios (95% CI) for probability of error and high burnout score:<br>• Diagnostic error: 1.66 (1.26, 2.20)<br>• Therapeutic error: 1.94 (1.39, 2.69)<br>*Adjusted for gender, occupational position, job experience | Adjusted* Odds Ratios (95% CI) for probability of suboptimal care and high burnout score:<br>• Psychosocial care = 1.58 (1.19, 2.10)<br>• Dx/Tx = 1.59 (1.17, 2.16)<br>• Quality assurance = 1.45 (1.10, 1.90)<br>*Adjusted for gender, occupational position, job experience |                         |
| Rabatin et al. (2016) <sup>29</sup><br>USA  | Primary care physicians in New York City, Chicago, and rural and urban Wisconsin<br><br>Recruited 1–6 patients/physician with diabetes, hypertension or congestive heart failure<br><br>Response rate:<br>Physicians: 59.6%<br>Nonparticipants did not differ from participants in specialty, age, or sex | n = 119 practices<br>n = 449 physicians<br>n = 1,419 patient charts<br><br>Physician characteristics:<br>Male: n = 235<br>Female: n = 187<br><br>Mean age: 43 ± 10yrs<br><br>Specialties:<br>Family Medicine: 47%<br>General Internal Medicine: 50%<br><br>Patient characteristics:<br>Not reported | Single item measure: "Using your own definition of burnout... (a) I have no symptoms of burnout; (b) Occasionally I am under stress... but I don't feel burned out; (c) I am definitely burning out and have one or more symptoms of burnout, such as physical and emotional exhaustion; (d) The symptoms of burnout that I'm experiencing won't go away...; (e) I feel completely burned out and often wonder if I can go on..."<br><br>The question correlates with the Emotional Exhaustion dimension of Maslach Burnout Inventory. <sup>40</sup> | Patient chart:<br><br>Chart audit using a standardized template to retrospectively assess over 18-months for guideline adherence, responsiveness to "recurrent abnormalities" and missed drug interactions.<br><br>Reliability not reported.                                                                                                                                                                                                                                                                                                    | Statistics not reported<br><br>No statistically significant differences between physicians with burnout and without.                                                                                                              |                                                                                                                                                                                                                                                                               |                         |

| Author(s)                                       | Study Population                                                                                                                                                                                             | Description of Sample                                                                                                                                                                                                                                                                                        | Burnout Measure                                                                                                                                                                                                                                                  | Quality of Care Measure                                                                                                                                                                                                                                                                                                                                                                                                                                                                              | Quality of Care Outcomes |                                                                                                                                                                                                                                                             |                                                                                                                                                                                                                                                                                                                               |
|-------------------------------------------------|--------------------------------------------------------------------------------------------------------------------------------------------------------------------------------------------------------------|--------------------------------------------------------------------------------------------------------------------------------------------------------------------------------------------------------------------------------------------------------------------------------------------------------------|------------------------------------------------------------------------------------------------------------------------------------------------------------------------------------------------------------------------------------------------------------------|------------------------------------------------------------------------------------------------------------------------------------------------------------------------------------------------------------------------------------------------------------------------------------------------------------------------------------------------------------------------------------------------------------------------------------------------------------------------------------------------------|--------------------------|-------------------------------------------------------------------------------------------------------------------------------------------------------------------------------------------------------------------------------------------------------------|-------------------------------------------------------------------------------------------------------------------------------------------------------------------------------------------------------------------------------------------------------------------------------------------------------------------------------|
|                                                 |                                                                                                                                                                                                              |                                                                                                                                                                                                                                                                                                              |                                                                                                                                                                                                                                                                  |                                                                                                                                                                                                                                                                                                                                                                                                                                                                                                      | Medical Errors (ME)      | Patient Satisfaction (PS)/Quality of Care (QoC)                                                                                                                                                                                                             | Communication/Attitudes                                                                                                                                                                                                                                                                                                       |
| Ratanawongsa et al. (2008) <sup>33</sup><br>USA | Physicians from 15 urban community-based clinics who provided primary care to adult patient enrolled in a randomized controlled trial for hypertensive minority patients.<br><br>Response rate: Not reported | n = 40 physicians<br><br>Mean years of practice: 11 ± 7.7 yrs<br><br>Male: 47%<br>Female: 53%<br><br>Mean age: 42 ± 8.7 yrs<br><br>Specialties:<br>Internal Medicine: 83%<br>Family Practice: 15%<br>General Practice: 2%<br><br>n = 235 patients<br><br>Male: 34%<br>Female: 66%<br>Mean age: 59 ± 13.2 yrs | A 6-item scale derived from the Maslach Burnout Inventory that captures the domains of EE and PA. Five point Likert scale from 1 = "strongly agree" to 5 = "strongly disagree".<br><br>Based on terciles, burnout scores were categorized as low, average, high. | Physician report: Physicians completed "brief questionnaires indicating the degree to which they knew the patient, their attitudes toward the patient in general, and their attitudes regarding the visit".<br><br>Audiotaped encounters analyzed for rapport-building communication behaviors using the Roter Interaction Analysis System. Four types of rapport identified: (1) Positive, (2) Negative, (3) Emotional, (4) Social<br><br>Reliability and predictive validity tested. <sup>41</sup> |                          | Adjusted* Odds Ratios (95% CI) for probability of PS with high vs low burnout:<br>• PS = 0.44 (0.18, 1.08), p=0.07<br>*Adjusted for patient health insurance, visit length, physician gender, physician IMG status, interaction btwn IMG status and burnout | Odds Ratios (95% CI) for probability of negative rapport building with medium and high vs low burnout:<br>• Medium: 1.85 (1.31, 2.61), p=0.001<br>• High: 2.06 (1.58, 2.86), p<0.001<br>*Adjusted for patient health insurance, visit length, physician gender, physician IMG status, interaction btwn IMG status and burnout |

| Author(s)                                    | Study Population                                                                                                                                                                                                                                                  | Description of Sample                                                                                                                                                                                                                                                                                                                                      | Burnout Measure                                                                                                                             | Quality of Care Measure                                                                                                                                                                                                                              | Quality of Care Outcomes                                                                                                                                                                                                                         |                                                 |                         |
|----------------------------------------------|-------------------------------------------------------------------------------------------------------------------------------------------------------------------------------------------------------------------------------------------------------------------|------------------------------------------------------------------------------------------------------------------------------------------------------------------------------------------------------------------------------------------------------------------------------------------------------------------------------------------------------------|---------------------------------------------------------------------------------------------------------------------------------------------|------------------------------------------------------------------------------------------------------------------------------------------------------------------------------------------------------------------------------------------------------|--------------------------------------------------------------------------------------------------------------------------------------------------------------------------------------------------------------------------------------------------|-------------------------------------------------|-------------------------|
|                                              |                                                                                                                                                                                                                                                                   |                                                                                                                                                                                                                                                                                                                                                            |                                                                                                                                             |                                                                                                                                                                                                                                                      | Medical Errors (ME)                                                                                                                                                                                                                              | Patient Satisfaction (PS)/Quality of Care (QoC) | Communication/Attitudes |
| Shanafelt et al. (2010) <sup>42</sup><br>USA | American surgeons who were members of the American College of Surgeons who permitted email correspondence.<br><br>Response rate: 32%                                                                                                                              | n = 7,905 physicians<br><br>Specialties:<br>General: 41%<br>Cardiothoracic: 6%<br>Colorectal: 4%<br>Otolaryngology: 5%<br>Obstetrics/gynecology: 1%<br>Oncologic: 5%<br>Pediatric: 2%<br>Plastic: 4%<br>Transplant: 2%<br>Trauma: 4%<br>Urologic: 4%<br>Vascular: 6%<br>Other: 6%<br><br>Male: 87%<br>Female: 13%<br><br>Median age (IQR): 51 yrs (43, 59) | 22-item Maslach Burnout Inventory- Human Services Survey                                                                                    | Physician report:<br><br>Response to:<br>"Are you concerned you have made any major medical error in the last 3 months?"<br><br>Psychometric properties not tested.                                                                                  | Odds Ratios (95% CI) for perceived medical error with MBI dimensions:<br>• EE = 1.048 (1.042, 1.055), p<0.0001<br>• DP = 1.109 (1.096, 1.122), p<0.0001<br>• PA = 0.965 (0.955, 0.975), p<0.0001                                                 |                                                 |                         |
| Shirom et al. (2006) <sup>43</sup><br>Israel | Physicians from 4 health plans specializing in either: ophthalmology, dermatology, otolaryngology, gynecology (community-based), general surgery, cardiology (hospital-based). 50% random probability sample drawn from each specialty.<br><br>Response rate: 63% | n = 890 physicians<br><br>Male: 80%<br>Female: 20%<br><br>Median age: 52 yrs                                                                                                                                                                                                                                                                               | 12-items from the Shirom-Melamed Burnout Measure with 3 sub-scales: (1) physical fatigue, (2) cognitive weariness, (3) emotional exhaustion | Physician report:<br><br>Physicians completed a 15-item version of the modified SERVQUAL. 5-point Likert scale from 1 = "to a very small extent" to 5 = "to a very large extent".<br><br>Psychometric properties of the modified version not tested. | Structural equation model examining relationships of autonomy, burnout and QoC:<br>• Relationship btwn global burnout and QoC not significant ( $\beta = -0.12$ , p>0.05)<br>• EE exhaustion negatively related to QoC ( $\beta = -40$ , p<0.05) |                                                 |                         |

| Author(s)                                                               | Study Population                                                                                                                                                                                    | Description of Sample                                                                                                         | Burnout Measure                                                                                                                                                                                        | Quality of Care Measure                                                                                                                                                                                                                                                                                                                                                                                                                         | Quality of Care Outcomes |                                                                                                                                                                                                                                                                                                                                                  |                                                                                                                                                                                                                                                                                                                                                                                                                                                                                                                                                                                                                                                                                                      |
|-------------------------------------------------------------------------|-----------------------------------------------------------------------------------------------------------------------------------------------------------------------------------------------------|-------------------------------------------------------------------------------------------------------------------------------|--------------------------------------------------------------------------------------------------------------------------------------------------------------------------------------------------------|-------------------------------------------------------------------------------------------------------------------------------------------------------------------------------------------------------------------------------------------------------------------------------------------------------------------------------------------------------------------------------------------------------------------------------------------------|--------------------------|--------------------------------------------------------------------------------------------------------------------------------------------------------------------------------------------------------------------------------------------------------------------------------------------------------------------------------------------------|------------------------------------------------------------------------------------------------------------------------------------------------------------------------------------------------------------------------------------------------------------------------------------------------------------------------------------------------------------------------------------------------------------------------------------------------------------------------------------------------------------------------------------------------------------------------------------------------------------------------------------------------------------------------------------------------------|
|                                                                         |                                                                                                                                                                                                     |                                                                                                                               |                                                                                                                                                                                                        |                                                                                                                                                                                                                                                                                                                                                                                                                                                 | Medical Errors (ME)      | Patient Satisfaction (PS)/Quality of Care (QoC)                                                                                                                                                                                                                                                                                                  | Communication/Attitudes                                                                                                                                                                                                                                                                                                                                                                                                                                                                                                                                                                                                                                                                              |
| <p>Travado et al. (2005)<sup>34</sup></p> <p>Italy, Spain, Portugal</p> | <p>Physicians recruited from cancer centers of three hospitals – two general hospitals with a cancer ward and one cancer hospital.</p> <p>Convenience sample</p> <p>Response rate: Not reported</p> | <p>n = 125 physicians</p> <p>Yrs of practice: 15 ± 9.4 yrs</p> <p>Male: 47%<br/>Female: 54%</p> <p>Mean age: 42 ± 9.7 yrs</p> | <p>22-item Maslach Burnout Inventory– Human Services Survey</p> <p>Used Maslach and Jackson<sup>6</sup> cutoff scores for no/low burnout, intermediate, and high burnout.</p>                          | <p>Physician report:</p> <p>Communication skills assessed using two scales: (1) Self-Confidence in Communications Skills (SCSS). 12-item scale rating ability to communicate and manage a series of clinical situations. (2) Expected Outcomes of Communication (EOC). 23-item scale assessing extent to which physician perceives result of communication is positive or negative.</p> <p>Psychometric testing not completed.<sup>44</sup></p> |                          |                                                                                                                                                                                                                                                                                                                                                  | <p>Correlations btwn MBI burnout dimensions and communication:</p> <p>Self-Confidence in Communication Skills</p> <ul style="list-style-type: none"> <li>• EE: r = -0.03, not significant</li> <li>• DP: r = -0.08, not significant</li> <li>• PA: r = 0.37, p&lt;0.01</li> </ul> <p>Negative Expected Outcomes of Communication</p> <ul style="list-style-type: none"> <li>• EE: r = -0.21, p&lt;0.05</li> <li>• DP: r = -0.25, p&lt;0.01</li> <li>• PA: r = 0.28, p&lt;0.01</li> </ul> <p>Positive Expected Outcomes of Communication</p> <ul style="list-style-type: none"> <li>• EE: r = 0.01, not significant</li> <li>• DP: r = 0.34, p&lt;0.01</li> <li>• PA: r = -0.28, p&lt;0.01</li> </ul> |
| <p>Weigl et al. (2015)<sup>45</sup></p> <p>Germany</p>                  | <p>Physicians working in one academic children's hospital who were providing patient care.</p> <p>Response rate: 74%</p>                                                                            | <p>n = 88 physicians</p> <p>Yrs of practice: 8 ± 6.7 yrs</p> <p>Male: 47%<br/>Female: 53%</p> <p>Mean age: 37 ± 8.6 yrs</p>   | <p>Two sub-scales of the German version of the Maslach Burnout Inventory–D: Emotional Exhaustion and Depersonalization.</p> <p>High burnout defined as Mean EE score &gt; 3.5 and Mean DP &gt; 2.5</p> | <p>Physician report:</p> <p>2-item perceived quality of care measure: "My workload frequently leads to reduced quality of work" and "Adverse work conditions frequently lead to a loss of quality." 5-point Likert scale from 1 = "not at all" to 5 = "a very great extent".</p> <p>Psychometric properties not tested for the two items taken from the German version of the MBI.</p>                                                          |                          | <p>Adjusted* Odds Ratios (95% CI) for probability of low QoC with MBI dimensions (Low vs High):</p> <ul style="list-style-type: none"> <li>• EE = 0.75 (0.08, 1.42), p&lt;0.05</li> <li>• DP = 0.17 (-0.45, 0.80), not significant</li> </ul> <p>*Adjusted for gender, professional tenure, clinical work environment, career stage/position</p> |                                                                                                                                                                                                                                                                                                                                                                                                                                                                                                                                                                                                                                                                                                      |

| Author(s)                                | Study Population                                                                                                                                                                                                                                                                                                                                                  | Description of Sample                                                                                                                                                                                                                                                                                                                                                                                                                                                                                                                                                                                                                                                               | Burnout Measure                                                                                                                                                                                                        | Quality of Care Measure                                                                                                                                                                                                                                               | Quality of Care Outcomes                                                                                                                                                                                                                                          |                                                 |                         |
|------------------------------------------|-------------------------------------------------------------------------------------------------------------------------------------------------------------------------------------------------------------------------------------------------------------------------------------------------------------------------------------------------------------------|-------------------------------------------------------------------------------------------------------------------------------------------------------------------------------------------------------------------------------------------------------------------------------------------------------------------------------------------------------------------------------------------------------------------------------------------------------------------------------------------------------------------------------------------------------------------------------------------------------------------------------------------------------------------------------------|------------------------------------------------------------------------------------------------------------------------------------------------------------------------------------------------------------------------|-----------------------------------------------------------------------------------------------------------------------------------------------------------------------------------------------------------------------------------------------------------------------|-------------------------------------------------------------------------------------------------------------------------------------------------------------------------------------------------------------------------------------------------------------------|-------------------------------------------------|-------------------------|
|                                          |                                                                                                                                                                                                                                                                                                                                                                   |                                                                                                                                                                                                                                                                                                                                                                                                                                                                                                                                                                                                                                                                                     |                                                                                                                                                                                                                        |                                                                                                                                                                                                                                                                       | Medical Errors (ME)                                                                                                                                                                                                                                               | Patient Satisfaction (PS)/Quality of Care (QoC) | Communication/Attitudes |
| Wen et al. (2016) <sup>46</sup><br>China | Physicians practicing in one of 46 hospitals in 10 provinces<br>n = 12 tertiary hospitals<br>n = 9 secondary hospitals<br>n = 25 primary hospitals<br><br>In the secondary and tertiary hospitals, physicians were selected from ≥ 10 clinical departments with > 10 people in the age groups: < 30 yrs, 30–39 yrs, 40–49 yrs, ≥ 50 yrs<br><br>Response rate: 89% | n = 1,607 total physicians<br>n = 192 physicians from primary hospitals<br>n = 354 physicians from secondary hospitals<br>n = 991 physicians from tertiary hospitals<br><br><u>Primary hospital</u><br>Male: 54%<br>Female: 46%<br><br>Mean age: 37 ± 9.9 yrs<br><br>Education:<br>≤ high school: 17%<br>Some college: 47%<br>Bachelors' degree: 35%<br>≥ Master's degree: 1.0%<br><br><u>Secondary hospital</u><br>Male: 53%<br>Female: 47%<br><br>Mean age: 36 ± 9.4 yrs<br><br>Education:<br>≤ high school: 4%<br>Some college: 17%<br>Bachelors' degree: 73%<br>≥ Master's degree: 6%<br><br><u>Tertiary hospital</u><br>Male: 61%<br>Female: 39%<br><br>Mean age: 36 ± 8.0 yrs | Used 15-item Chinese version of the Maslach Burnout Inventory-General Survey<br><br>Respondents grouped into three categories:<br>(1) No burnout symptoms<br>(2) Some burnout symptoms<br>(3) Serious burnout symptoms | Physician report: Physicians were asked if they had made any of the following medical errors: (1) patient was harmed, (2) medication error, (3) treatment delayed, (4) incomplete or incorrect item in the patient record.<br><br>Psychometric properties not tested. | Adjusted* Odds Ratios (95% CI) for probability of any medical error with no burnout symptoms group as reference:<br>• Some burnout symptoms: 1.46 (1.13, 1.89)<br>• Serious burnout symptoms: 2.28 (1.63, 3.17)<br>*Adjusted for sex, workload, and hospital type |                                                 |                         |

| Author(s)                                      | Study Population                                                                                                                                                 | Description of Sample                                                                                                                      | Burnout Measure                                 | Quality of Care Measure                                                                                                                                                                                                                                                                                                                                                                                                                    | Quality of Care Outcomes |                                                                                                                                           |                         |
|------------------------------------------------|------------------------------------------------------------------------------------------------------------------------------------------------------------------|--------------------------------------------------------------------------------------------------------------------------------------------|-------------------------------------------------|--------------------------------------------------------------------------------------------------------------------------------------------------------------------------------------------------------------------------------------------------------------------------------------------------------------------------------------------------------------------------------------------------------------------------------------------|--------------------------|-------------------------------------------------------------------------------------------------------------------------------------------|-------------------------|
|                                                |                                                                                                                                                                  |                                                                                                                                            |                                                 |                                                                                                                                                                                                                                                                                                                                                                                                                                            | Medical Errors (ME)      | Patient Satisfaction (PS)/Quality of Care (QoC)                                                                                           | Communication/Attitudes |
|                                                |                                                                                                                                                                  | Education:<br>≤ high school: 1%<br>Some college: 3%<br>Bachelors' degree: 46%<br>≥ Master's degree: 51%                                    |                                                 |                                                                                                                                                                                                                                                                                                                                                                                                                                            |                          |                                                                                                                                           |                         |
| Weng et al. (2011) <sup>35</sup><br><br>Taiwan | Physicians working in two hospitals.<br><br>Patients of participating physicians.<br><br>Physician response rate: Not reported<br><br>Patient response rate: 78% | n = 110 internists<br><br>Male: 85%<br>Female: 15%<br><br>Mean age: 41 ± 6.9 yrs<br><br>n = 2,872 patients<br><br>Male: 59%<br>Female: 41% | Maslach Burnout Inventory-Human Services Survey | Patient report:<br><br>Patient satisfaction assessed with two questions: "I am satisfied with the care provided by my doctor" and "I would recommend this doctor to my friends and family members".<br><br>Single item from the CSQ's <sup>36</sup> General Satisfaction sub-scale not validated for individual use.<br><br>Single item about recommendation was correlated with EUROPEP patient satisfaction questionnaire. <sup>47</sup> |                          | Correlation btwn MBI burnout dimensions and PS:<br>• EE: not significant<br>• DP: negative relationship (p<0.01)<br>• PA: not significant |                         |

## Description of the Study Populations

Six of the studies focused on hospital-based physicians.<sup>5,30,34,35,45,46</sup> Among these studies, two focused on cancer<sup>34</sup> and children's<sup>45</sup> specialty hospitals. In addition, one of these studies recruited surgeons practicing either in general surgery or gynecological wards.<sup>5</sup> One of these studies<sup>46</sup> also included people practicing as physicians who did not have graduate educations.

The remaining five studies recruited physicians practicing in a variety of settings. Three studies sought physicians in primary health care centers;<sup>29,31,33</sup> they included physicians practicing in internal medicine, general practice, and family practice. One of the studies<sup>29</sup> that recruited primary care physicians focused on the quality of care only for patients with diabetes and/or hypertension.

Two studies did not specify the setting.<sup>32,42</sup> However, of these two, one focused on surgeons.<sup>42</sup> Finally, one study used four health plans to recruit and contained a mixture of community and hospital physicians<sup>43</sup> which included physicians specializing in ophthalmology, dermatology, otolaryngology, community-based gynecology, general surgery, and hospital-based cardiology.

## Measuring Burnout

In nine of the 12 studies, burnout was measured using either the 22-item Maslach Burnout Inventory (MBI),<sup>6</sup> translated version of the MBI-GS,<sup>46</sup> translated version of the MBI-HS<sup>30,31</sup> or selected MBI sub-scales.<sup>30-35,42,45,46</sup> The complete 22-item MBI measures three dimensions of burnout: Emotional Exhaustion, Depersonalization and Personal Accomplishment. It is one of the most widely used measures of burnout in the scientific literature.<sup>48,49</sup> One study<sup>29</sup> used a single item measure for burnout that correlates with the Emotional Exhaustion sub-scale of the MBI.<sup>40</sup>



1  
2  
3 The two remaining studies used the Copenhagen Burnout Inventory (CBI)<sup>48</sup> and the  
4 Shirom-Melamed Burnout Measure (SMBM).<sup>49,50</sup> The CBI is a 19-item scale comprised of three  
5 sub-scales that assess personal burnout, work-related burnout, and client-related burnout.<sup>48</sup> It has  
6 been shown to be correlated with mental and general health as well as job satisfaction.<sup>48</sup> The  
7 SMBM is a 22-item measure with three sub-scales that assess physical fatigue, emotional  
8 exhaustion, and cognitive weariness.<sup>49</sup> The psychometric properties of these scales continue to  
9 be explored.<sup>49,51,52</sup>

### 19 Measuring Quality of Care related to Acceptability and Patient Safety

21 Four types of quality of care measures related to acceptability and safety were used in  
22 these studies. In terms of patient safety, medical errors were measured. Acceptability related  
23 measures included patient satisfaction, perceived general quality of care, and physician  
24 communication/attitudes.

#### 31 *Patient Safety Measures: Medical errors*

33 Patient safety was examined with medical errors. This outcome was assessed in five  
34 studies.<sup>5,29,30,42,46</sup> Wen et al.<sup>46</sup> asked respondents whether they had made any medical errors  
35 including one that resulted in a patient being harmed, a medication error, delay in treatment, or  
36 incomplete or incorrect item being added to the patient record. Hayashino et al.<sup>30</sup> and Shanafelt  
37 et al.<sup>42</sup> used similar questions about whether the respondent made major medical errors.  
38 However, the studies differed in the time frame that the respondent was asked to consider.  
39 Hayashino et al.<sup>30</sup> asked about the past year while Shanafelt et al.<sup>42</sup> inquired about the past three  
40 months. In contrast to these studies, Klein et al.<sup>5</sup> asked about frequency of diagnostic mistakes  
41 and treatment without specifying a time frame. The studies differ in the types of errors that they  
42 asked about (i.e., *major* errors rather than *any* errors). In addition, they depend on recall and  
43  
44  
45  
46  
47  
48  
49  
50  
51  
52  
53  
54  
55  
56  
57  
58  
59

1  
2  
3 self-report. Shanafelt et al.<sup>42</sup> note that studies have used this type of question to gather  
4  
5 information about medical errors. However, there are also studies that have found that  
6  
7 physicians under-report medical errors.<sup>53</sup> Furthermore, there is evidence that physicians have a  
8  
9 limited ability to self-assess their practice patterns.<sup>54</sup>  
10

11  
12 In addition to questions about frequency of diagnostic mistakes and treatment, Klein et  
13  
14 al.<sup>5</sup> included a questionnaire based on the Canadian Physician Achievement Review to evaluate  
15  
16 physician self-perceived quality of psychosocial care, diagnosis/therapy, and quality assurance.<sup>55</sup>  
17  
18 However, the authors note that additional work regarding its validity is warranted.<sup>5</sup>  
19

20  
21 There was only one study that did not rely on self-report to gather information about  
22  
23 medical errors. Rabatin et al.<sup>29</sup> used a chart audit to assess medical errors characterized by  
24  
25 adherence to guidelines, responsiveness to “recurrent abnormalities” and missed drug  
26  
27 interactions.  
28

### 30 *Acceptability Measures: Patient satisfaction/Perceived Quality of Care*

31  
32  
33 With regard to acceptability measures, patient satisfaction was assessed in four  
34  
35 studies.<sup>31,32,35,43</sup> In two of these studies, the SERVQUAL was used to measure patient  
36  
37 satisfaction/quality of care.<sup>32,43</sup> The SERVQUAL was developed to measure service quality  
38  
39 along five dimensions: (1) tangibles (i.e., physical facilities), (2) reliability (i.e., performs  
40  
41 dependably and accurately), (3) responsiveness (i.e., willingness to help), (4) assurance (i.e.,  
42  
43 ability to inspire trust), and (5) empathy (i.e., caring).<sup>56</sup> Halbesleben and Rathert<sup>32</sup> used a  
44  
45 healthcare specific version of the SERVQUAL. The psychometric properties of the scale were  
46  
47 examined.<sup>38</sup> However, Asubonteng et al.<sup>39</sup> have raised questions about the strength of the scale’s  
48  
49 psychometric properties.  
50  
51  
52  
53  
54  
55  
56  
57  
58  
59  
60

1  
2  
3 Shirom and colleagues<sup>43</sup> adapted the SERVQUAL by eliminating seven items and  
4  
5 revising the language for physicians to rate their own quality of care using the remaining 15  
6  
7 items. The validity of this modified measure was not examined.  
8  
9

10 Weigl et al.<sup>45</sup> looked at physician-perceived quality of care by asking physicians to rate  
11  
12 two statements on a 5-point scale, “My workload frequently leads to reduced quality of work,”  
13  
14 and “Adverse work conditions frequently lead to a loss of quality.” The authors reference the  
15  
16 German version of the MBI as the source for these questions. However, they do not provide  
17  
18 information about the psychometric properties of the individual use of these items.  
19  
20

21 One study<sup>31</sup> used the Consultation Satisfaction Questionnaire (CSQ) scale that was  
22  
23 created and validated to assess patient satisfaction with general practitioners.<sup>36</sup> It is comprised of  
24  
25 18 items and measures satisfaction along four dimensions: general satisfaction, professional care,  
26  
27 depth of relationship, and perceived time.  
28  
29

30 Finally, in their study, Weng et al.<sup>35</sup> used two questions to indicate patient satisfaction, “I  
31  
32 am satisfied with the care provided by my doctor,” and “I would recommend this doctor to my  
33  
34 friends and family.” The first of Weng et al.’s<sup>35</sup> question is similar to one of the CSQ’s<sup>36</sup> general  
35  
36 satisfaction items, “I am totally satisfied with my visit to the doctor.” However, the use of this  
37  
38 single-item has not been validated. A version of the second question has been used to measure  
39  
40 satisfaction and was correlated with the EUROPEP patient satisfaction questionnaire.<sup>47</sup>  
41  
42  
43

#### 44 *Acceptability Measures: Communication/Attitudes*

45  
46 Two studies focused on physician communication/attitudes.<sup>33,34</sup> Using audiotapes of  
47  
48 physician/patient interactions, Ratanawongsa et al.<sup>33</sup> assessed the interactions by employing the  
49  
50 Roter Interaction Analysis System (RIAS).<sup>57</sup> RIAS is a validated method of categorizing these  
51  
52 interactions into three categories related either to content, affection, or process.<sup>58</sup> There is  
53  
54  
55  
56  
57  
58  
59

1  
2  
3 evidence that there is an association between the content and the socioemotional nature of the  
4 interactions as categorized using the RIAS and patient satisfaction.<sup>57,58</sup>  
5  
6

7  
8 Travado et al.<sup>34</sup> examined the association between burnout and communication using two  
9  
10 measures: the Self-Confidence in Communications Skills (SCSS) and the Expected Outcomes of  
11 Communication (EOC).<sup>44</sup> In their article, Parle and colleagues<sup>44</sup> note that exploration of the  
12  
13 psychometric properties of both measures were being conducted but were not yet completed.  
14  
15 Both were developed to understand the communication skills of physicians working with cancer  
16  
17 patients.  
18  
19

#### 20 21 Study Outcomes: Burnout and Quality of Care 22

23  
24 In this sub-section, we report about the quality of care outcomes from the included  
25  
26 studies (Table 1). This review of outcomes begins by describing the findings regarding the  
27  
28 association between burnout and patient safety (i.e., medical errors). It is followed by reporting  
29  
30 of the acceptability outcomes as measured by patient satisfaction/perceived quality of care and  
31  
32 physician communication/attitudes.  
33  
34

#### 35 36 *Outcomes: Burnout and Medical Errors* 37

38  
39 Table 1 contains the outcomes reported by the included papers. In terms of findings for  
40  
41 the association between burnout and medical errors, there was a consistently significant  
42  
43 relationship between burnout and medical errors among four papers focusing on this  
44  
45 relationship.<sup>5,30,42,46</sup> Shanafelt et al.<sup>42</sup> reported significantly higher odds of a major medical error  
46  
47 during the past three months among physicians with higher EE and DP but lower odds among  
48  
49 physicians with higher PA. Hayashino et al.<sup>30</sup> also observed significant associations between a  
50  
51 major medical error during the past 12 months and higher levels of EE and DP; however, the  
52  
53 relationship with PA was not significant. Klein et al.<sup>5</sup> reported significant associations between  
54  
55  
56  
57  
58  
59

1  
2  
3 high burnout and diagnostic error, therapeutic error, sub-optimal psychosocial care, sub-optimal  
4 diagnosis and treatment, and sub-optimal quality assurance. Wen et al.<sup>46</sup> found higher odds of  
5 medical errors among physicians with either some or serious burnout symptoms as opposed to no  
6 burnout symptoms.  
7  
8  
9  
10

11  
12 The one paper<sup>29</sup> that assessed errors based on chart audits did not find a significant  
13 relationship between burnout and medical errors. But, it should be noted that this study focused  
14 on treatment for a sub-group of patients with chronic disorders that included diabetes and/or  
15 hypertension.  
16  
17  
18  
19  
20

### 21 *Outcomes: Burnout and Patient Satisfaction/Quality of Care*

22  
23  
24 Among the four studies that examined the relationship between burnout and patient  
25 satisfaction/quality of care, three observed a significant relationship between either burnout or at  
26 least one dimension of burnout.<sup>31-33,35</sup> The one study<sup>33</sup> that combined the MBI EE and PA  
27 dimensions to create a single burnout score did not find a significant relationship between the  
28 score and patient satisfaction. Because it used only two sub-scales and one of them was PA  
29 rather than DP, it is not clear regarding the extent to which their choice of sub-scales was  
30 consistent with the other measures of burnout.  
31  
32  
33  
34  
35  
36  
37  
38  
39

40 Among the three studies that reported separate MBI dimensions, there seemed to be a  
41 consistent observation that high DP is significantly related to lower patient satisfaction.<sup>31,32,35</sup>  
42 However, the significance of the association between EE and patient satisfaction varied among  
43 studies; Anagnostopoulos et al.<sup>31</sup> reported a significant correlation but Weng et al.<sup>35</sup> did not.  
44  
45  
46  
47  
48

49 At the same time, Shirom et al.<sup>43</sup> described a significantly negative relationship between  
50 high EE and physician perceived quality of care. Weigl and colleagues<sup>45</sup> also found a significant  
51  
52  
53  
54  
55  
56  
57  
58  
59  
60

1  
2  
3 negative relationship with EE but did not find a significant relationship between DP and  
4  
5 physician perceived quality of care.  
6

#### 7 *Outcomes: Burnout and Communication/Attitudes*

8  
9  
10 Travado et al.<sup>34</sup> found a significantly positive relationship between PA and self-  
11  
12 confidence in communication skills as well as with negative expected outcomes of  
13  
14 communication. They also observed a significantly negative association between PA and positive  
15  
16 expected outcomes of communication. In addition, Ratanawongsa et al.<sup>33</sup> reported a higher  
17  
18 probability of negative rapport with medium and high burnout.  
19  
20

## 21 **DISCUSSION**

22  
23  
24 This systematic literature review identified 12 studies of which 10 had a moderate risk of  
25  
26 bias and two had a high risk of bias. The results of these physician burnout studies show that  
27  
28 patient safety has been primarily measured by examining medical errors. The acceptability  
29  
30 outcomes have been captured using two groups of indicators that measure patient  
31  
32 satisfaction/perceived quality of care and physician communication/attitudes towards patients.  
33  
34 The majority of these studies examined the relationship between burnout and acceptability.  
35  
36 Among the acceptability-related quality of care outcomes, the focus has been on patient  
37  
38 satisfaction/perceived quality of care.  
39  
40  
41

42  
43 The results of four of the five included studies that reported on the relationship between  
44  
45 burnout and medical errors suggest there is evidence that burnout is associated with physician  
46  
47 self-perceived medical errors and sub-optimal care. However, there is equivocal evidence that  
48  
49 specific dimensions of burnout are related to the acceptability dimension of quality of care as  
50  
51 measured by patient satisfaction, perceived quality of care, or physician  
52  
53 communication/attitudes. Thus, the current body of evidence suggests there is moderate  
54  
55  
56  
57  
58  
59

1  
2  
3 evidence for the association between burnout and safety aspects of healthcare whereas the  
4  
5 evidence is weaker for the patient-related acceptability aspects of quality.  
6

### 7 **Strengths and Limitations of Interpreting the Literature**

8  
9  
10 One of the important questions raised by burnout studies in general is highlighted by  
11  
12 Klein et al.'s<sup>5</sup> and Shirom et al.'s<sup>43</sup> use of non-MBI scales. Klein and colleagues<sup>5</sup> used the  
13  
14 Copenhagen Burnout Inventory while Shirom et al.<sup>43</sup> used the Shirom-Melamed Burnout  
15  
16 Measure. One of the criticisms that the separate developers of these two scales raise is that the  
17  
18 MBI does not fully assess burnout.<sup>43,48</sup> Rather, both groups argue that fatigue and exhaustion are  
19  
20 fundamental to the definition of burnout.<sup>43,48</sup> However, this emphasis on exhaustion may be  
21  
22 reflected in the fact that EE is the most widely studied of the MBI dimensions.<sup>59</sup> This would  
23  
24 argue for the assessment of this dimension in studies of burnout and the individual reporting of  
25  
26 it.  
27  
28  
29

30  
31 Another limitation of these studies was the reliance on physician self-report data for the  
32  
33 assessment of medical errors. The self-report could be influenced by a number of factors  
34  
35 including recall bias and social desirability. There is a potential additional bias introduced if  
36  
37 self-report is used for both the outcome and the problem.<sup>60</sup> The presence of burnout could also  
38  
39 influence perceptions. For example, Fahrenkopf et al.<sup>61</sup> observed a discrepancy between the  
40  
41 results of chart audits and physician self-report; those with higher burnout scores reported higher  
42  
43 numbers of medical errors than the chart audits would suggest.  
44  
45

46  
47 An alternative to self-report would be observational data. However, watching physicians  
48  
49 while they practice could lead to a Hawthorne Effect. Another alternative would be to review  
50  
51 medical records to identify errors. But, this relies on the accuracy of the records. Also, it is not  
52  
53 clear what types of medical errors should be assessed – major errors leading to an adverse event  
54  
55  
56  
57  
58  
59

1  
2  
3 or any medical error regardless of outcome? In their study, Fahrenkopf et al.<sup>61</sup> used a  
4  
5 standardized method to abstract information from charts and trained reviewers to categorize the  
6  
7 errors into groups: (1) preventable adverse event, (2) non-preventable adverse event, (3) potential  
8  
9 adverse event, and (4) error with little potential for harm. Further work could examine how  
10  
11 physicians define errors as well as the reliability of error self-report. In addition, to improve the  
12  
13 comparability of outcomes, future studies could incorporate and report severity of medical error  
14  
15 scores.  
16  
17  
18

19         There was a diverse set of measures used in the studies that focused on patient  
20  
21 satisfaction and quality of care. They varied in what and how they measured the outcome. In  
22  
23 addition, the majority of the studies did not use validated outcome measures. For example,  
24  
25 perceived quality of care was assessed using a variety of measures that ranged from two items  
26  
27 for which the psychometric properties were not tested to a scale designed to assess service  
28  
29 quality on six dimensions. Thus, it is difficult to discern the extent to which the study results  
30  
31 could be attributed to the differences in the dimensions assessed. Further exploration along this  
32  
33 line of inquiry could be undertaken to understand the aspects of satisfaction and perceived  
34  
35 quality of care that are significantly associated with burnout.  
36  
37  
38

39         An additional limitation of the existing body of literature is the reliance on cross-  
40  
41 sectional study designs. Cross-sectional design limits conclusions regarding causality. Cross-  
42  
43 sectional data does not distinguish the sequence of conditions. For example, did burnout cause  
44  
45 decreased quality of care? Or, did decreased quality of care cause burnout? At best, the cross-  
46  
47 sectional data used in these studies can only be used to determine that there is a relationship. At  
48  
49 that same time, there is evidence from studies that have used longitudinal data to examine  
50  
51 burnout and medical errors among residents that there is a causal relationship such that burnout  
52  
53  
54  
55  
56  
57  
58  
59



1  
2  
3 causes errors.<sup>62</sup> However, the longitudinal data that contributes to the strength of West et al.'s<sup>62</sup>  
4  
5 is potentially weakened by the self-reported medical errors.  
6

7  
8 Finally, only two studies<sup>5,29</sup> described the population from which the study sample was  
9  
10 drawn. Thus, it is difficult to determine whether there was a difference between the study  
11  
12 participants and non-participants. To aid in the interpretation of the results (i.e., the  
13  
14 generalizability), it would be useful for future studies to report this type of information.  
15

### 16 17 **Strengths and Limitations of the Search Strategy**

18  
19 Although six databases were used in the search, articles that did not appear in any of the  
20  
21 databases would have been missed. To decrease the possibility of this occurring, we employed a  
22  
23 broad scope in development of the search terms for each database and followed this with a hand  
24  
25 search of included articles. Another potential limitation is the fact that the search focused on  
26  
27 articles published in English-language journals. However, despite the English-language  
28  
29 constraint, the identified studies originated in European, Middle Eastern, North American and  
30  
31 Asian countries. This indicates that although the research was not conducted in countries where  
32  
33 English is the first language, at least some of these researchers publish in English-language  
34  
35 journals. Finally, there is also a potential limitation associated with focusing on published peer-  
36  
37 reviewed articles. In doing so, we may be subject to publication bias.<sup>63</sup> At the same time, the  
38  
39 quality of the gray literature has been questioned because it is not necessarily subject to critical  
40  
41 assessment prior to being published.<sup>64</sup> As a result, unpublished studies may be of lower quality  
42  
43 and have greater risk of bias in their study designs.  
44  
45  
46  
47  
48  
49  
50  
51  
52  
53  
54  
55  
56  
57  
58  
59  
60

## CONCLUSIONS

The focus on quality related to direct care can highlight additional ways that physician burnout affects the healthcare system. These results contribute evidence about whether the effects of physician burnout are limited to physicians or whether consequences of physician burnout are more extensive. They also can help to inform decisions about how to improve patient care by addressing physician burnout. That is, decisions can be informed when confronting a question of how to improve quality of patient care. There are a number of ways in which this may be done through investment in capital such as new technologies. The results of this systematic review suggest that an alternative investment could be in human resources as represented by physician staff.

The results of this systematic literature review suggest that there is moderate evidence that burnout is associated with safety-related quality of care. Because of the variability in the way patient acceptability-related quality of care was measured and the inconsistency in study findings, the evidence supporting the relationship between burnout and patient acceptability-related quality of care is less strong. Future research evaluating burnout interventions for physicians could consider looking at safety-related quality of care to assess the effectiveness of these interventions. Continued work looking at the relationship between dimensions of acceptability-related quality of measures and burnout is warranted.

## DATA SHARING STATEMENT

All the published papers used in this manuscript are publicly available. There are no data available.

## **FUNDING**

This work was funded by an Arnold P. Gold Foundation Mapping the Landscape grant.

Any views expressed or errors are the sole responsibility of the authors.

## **COMPETING INTERESTS**

The authors declare that they have no competing interests.

## **CONTRIBUTORSHIP STATEMENT**

CSD led the conception, design, data acquisition, analysis and interpretation of the data; she also led the writing of the overall manuscript. DL collaborated on the design, data acquisition and analysis; he contributed to the writing of the overall manuscript and led the writing of the Methods section. SB collaborated on the design and data acquisition and contributed to the writing of the manuscript. LT collaborated on the data acquisition and analysis. All authors read and approved the final manuscript. All authors are guarantors of the final manuscript.

## REFERENCES

1. Allegra CJ, Hall R, Yothers G. Prevalence of burnout in the u.s. Oncology community: results of a 2003 survey. *J Oncol Pract* 2005;1(4):140-147.
2. Arigoni F, Bovier PA, Sappino AP. Trend of burnout among Swiss doctors. *Swiss Med Wkly* 2010;140:w13070.
3. Elit L, Trim K, Mand-Bains IH, Sussman J, Grunfeld E. Job satisfaction, stress, and burnout among Canadian gynecologic oncologists. *Gynecol Oncol* 2004;94(1):134-139.
4. Embriaco N, Azoulay E, Barrau K, et al. High level of burnout in intensivists: prevalence and associated factors. *Am J Respir Crit Care Med* 2007;175(7):686-692.
5. Klein J, Grosse Frie K, Blum K, von dem Knesebeck O. Burnout and perceived quality of care among German clinicians in surgery. *Int J Qual Health Care* 2010;22(6):525-530.
6. Maslach C, Jackson SE. The measurement of experienced burnout. *Journal of Occupational Behaviour* 1981;2:99-113.
7. Maslach C, Schaufeli WB, Leiter MP. Job burnout. *Annu Rev Psychol* 2001;52:397-422.
8. Dewa CS, Jacobs P, Thanh NX, Loong D. An estimate of the cost of burnout on early retirement and reduction in clinical hours of practicing physicians in Canada. *BMC Health Serv Res* 2014;14:254.
9. Sharma A, Sharp DM, Walker LG, Monson JR. Stress and burnout in colorectal and vascular surgical consultants working in the UK National Health Service. *Psychooncology* 2008;17(6):570-576.
10. Siu CFY, Yuen SK, Cheung A. Burnout among public doctors in Hong Kong: cross-sectional survey. *Hong Kong Medical Journal* 2012;18(3):186-192.
11. Asai M, Morita T, Akechi T, et al. Burnout and psychiatric morbidity among physicians engaged in end-of-life care for cancer patients: a cross-sectional nationwide survey in Japan. *Psychooncology* 2007;16(5):421-428.
12. Dewa CS, Loong D, Bonato S, Thanh NX, Jacobs P. How does burnout affect physician productivity? A systematic literature review. *BMC Health Serv Res* 2014;14:325.
13. World Health Organization. *Quality of care: A process for making strategic choices in health systems*. Geneva 2006.
14. Institute of Medicine. *Crossing the Quality Chasm: A New Health System for the 21st Century*. Washington, D.C. 2001.
15. Roberts JS. Chapter 1 Quality Health Care: Its Definitions and Evaluation. In: Huges EFX, ed. *Perspectives on Quality in American Health Care*. Washington, DC: McGraw-Hill, Inc.; 1988.
16. Wallace JE, Lemaire JB, Ghali WA. Physician wellness: a missing quality indicator. *Lancet* 2009;374(9702):1714-1721.
17. de Jong MA, Nieuwenhuijsen K, Sluiter JK. Common mental disorders related to incidents and behaviour in physicians. *Occup Med (Lond)* 2016;66(7):506-513.
18. Hall LH, Johnson J, Watt I, Tsipa A, O'Connor DB. Healthcare Staff Wellbeing, Burnout, and Patient Safety: A Systematic Review. *PLoS One* 2016;11(7):e0159015.
19. Williams ES, Skinner AC. Outcomes of physician job satisfaction: a narrative review, implications, and directions for future research. *Health Care Manage Rev* 2003;28(2):119-139.
20. Salyers MP, Bonfils KA, Luther L, et al. The Relationship Between Professional Burnout and Quality and Safety in Healthcare: A Meta-Analysis. *J Gen Intern Med* 2016.

21. Angerer P, Weigl M. Physicians' psychosocial work conditions and quality of care: A literature review. *Professions & Professionalism* 2015;5(1):1-14.
22. Lee RT, Seo B, Hladkyj S, Lovell BL, Schwartzmann L. Correlates of physician burnout across regions and specialties: a meta-analysis. *Hum Resour Health* 2013;11:48.
23. Moher D, Liberati A, Tetzlaff J, Altman DG, Group P. Preferred reporting items for systematic reviews and meta-analyses: the PRISMA statement. *PLoS Med* 2009;6(7):e1000097.
24. McGowan J, Sampson M, Salzwedel DM, Cogo E, Foerster V, Lefebvre C. PRESS Peer Review of Electronic Search Strategies: 2015 Guideline Statement. *J Clin Epidemiol* 2016;75:40-46.
25. Cohen J. A Coefficient of Agreement for Nominal Scales. *Educational and Psychological Measurement* 1960;20(1):37-46.
26. Sanderson S, Tatt ID, Higgins JP. Tools for assessing quality and susceptibility to bias in observational studies in epidemiology: a systematic review and annotated bibliography. *Int J Epidemiol* 2007;36(3):666-676.
27. von Elm E, Altman DG, Egger M, et al. The Strengthening the Reporting of Observational Studies in Epidemiology (STROBE) statement: guidelines for reporting observational studies. *PLoS Med* 2007;4(10):e296.
28. Lagerveld SE, Bultmann U, Franche RL, et al. Factors associated with work participation and work functioning in depressed workers: a systematic review. *Journal of occupational rehabilitation* 2010;20(3):275-292.
29. Rabatin J, Williams E, Baier Manwell L, Schwartz MD, Brown RL, Linzer M. Predictors and Outcomes of Burnout in Primary Care Physicians. *J Prim Care Community Health* 2016;7(1):41-43.
30. Hayashino Y, Utsugi-Ozaki M, Feldman MD, Fukuhara S. Hope modified the association between distress and incidence of self-perceived medical errors among practicing physicians: prospective cohort study. *PLoS One* 2012;7(4):e35585.
31. Anagnostopoulos F, Liolios E, Persefonis G, Slater J, Kafetsios K, Niakas D. Physician burnout and patient satisfaction with consultation in primary health care settings: evidence of relationships from a one-with-many design. *J Clin Psychol Med Settings* 2012;19(4):401-410.
32. Halbesleben JR, Rathert C. Linking physician burnout and patient outcomes: exploring the dyadic relationship between physicians and patients. *Health Care Manage Rev* 2008;33(1):29-39.
33. Ratanawongsa N, Roter D, Beach MC, et al. Physician burnout and patient-physician communication during primary care encounters. *J Gen Intern Med* 2008;23(10):1581-1588.
34. Travado L, Grassi L, Gil F, Ventura C, Martins C, Southern European Psycho-Oncology Study G. Physician-patient communication among Southern European cancer physicians: the influence of psychosocial orientation and burnout. *Psychooncology* 2005;14(8):661-670.
35. Weng HC, Hung CM, Liu YT, et al. Associations between emotional intelligence and doctor burnout, job satisfaction and patient satisfaction. *Med Educ* 2011;45(8):835-842.
36. Baker R. Development of a questionnaire to assess patients' satisfaction with consultations in general practice. *Br J Gen Pract* 1990;40(341):487-490.

- 1
- 2
- 3
- 4 37. Poulton BC. Use of the consultation satisfaction questionnaire to examine patients' satisfaction with general practitioners and community nurses: reliability, replicability and discriminant validity. *Br J Gen Pract* 1996;46(402):26-31.
- 5
- 6 38. Scardina SA. SERVQUAL: a tool for evaluating patient satisfaction with nursing care. *J Nurs Care Qual* 1994;8(2):38-46.
- 7
- 8 39. Asubonteng P, McCleary KJ, Swan JE. SERVQUAL revisited: a critical review of service quality. *Journal of Services Marketing* 1996;10(6):62-81.
- 9
- 10 40. Dolan ED, Mohr D, Lempa M, et al. Using a single item to measure burnout in primary care staff: a psychometric evaluation. *J Gen Intern Med* 2015;30(5):582-587.
- 11
- 12 41. Roter D, Larson S. The Roter interaction analysis system (RIAS): utility and flexibility for analysis of medical interactions. *Patient Educ Couns* 2002;46(4):243-251.
- 13
- 14 42. Shanafelt TD, Balch CM, Bechamps G, et al. Burnout and medical errors among American surgeons. *Ann Surg* 2010;251(6):995-1000.
- 15
- 16 43. Shirom A, Nirel N, Vinokur AD. Overload, autonomy, and burnout as predictors of physicians' quality of care. *J Occup Health Psychol* 2006;11(4):328-342.
- 17
- 18 44. Parle M, Maguire P, Heaven C. The development of a training model to improve health professionals' skills, self-efficacy and outcome expectancies when communicating with cancer patients. *Soc Sci Med* 1997;44(2):231-240.
- 19
- 20 45. Weigl M, Schneider A, Hoffmann F, Angerer P. Work stress, burnout, and perceived quality of care: a cross-sectional study among hospital pediatricians. *Eur J Pediatr* 2015;174(9):1237-1246.
- 21
- 22 46. Wen J, Cheng Y, Hu X, Yuan P, Hao T, Shi Y. Workload, burnout, and medical mistakes among physicians in China: A cross-sectional study. *Biosci Trends* 2016;10(1):27-33.
- 23
- 24 47. Kersnik J. Patients' recommendation of doctor as an indicator of patient satisfaction. *Hong Kong Medical Journal* 2003;9(4):247-250.
- 25
- 26 48. Kristensen TS, Borritz M, Villadsen E, Christensen KB. The Copenhagen Burnout Inventory: A new tool for the assessment of burnout. *Work Stress* 2005;19:192-207.
- 27
- 28 49. Lundgren-Nilsson A, Jonsdottir IH, Pallant J, Ahlborg G, Jr. Internal construct validity of the Shirom-Melamed Burnout Questionnaire (SMBQ). *BMC Public Health* 2012;12:1.
- 29
- 30 50. Shirom A, Melamed S. A Comparison of the Construct Validity of Two Burnout Measures in Two Groups of Professionals. *International Journal of Stress Management* 2006;13(2):176-200.
- 31
- 32 51. Qiao H, Schaufeli WB. The Convergent Validity of Four Burnout Measures in a Chinese Sample: A Confirmatory Factor-Analytic Approach. *Applied Psychology* 2011;60(1):87-111.
- 33
- 34 52. Winwood PC, Winefield AH. Comparing two measures of burnout among dentists in Australia. *International Journal of Stress Management* 2004;11:282-289.
- 35
- 36 53. Kaldjian LC, Jones EW, Wu BJ, Forman-Hoffman VL, Levi BH, Rosenthal GE. Reporting medical errors to improve patient safety: a survey of physicians in teaching hospitals. *Arch Intern Med* 2008;168(1):40-46.
- 37
- 38 54. Davis DA, Mazmanian PE, Fordis M, Van Harrison R, Thorpe KE, Perrier L. Accuracy of physician self-assessment compared with observed measures of competence: a systematic review. *JAMA* 2006;296(9):1094-1102.
- 39
- 40 55. Hall W, Violato C, Lewkonja R, et al. Assessment of physician performance in Alberta: the physician achievement review. *CMAJ* 1999;161(1):52-57.
- 41
- 42
- 43
- 44
- 45
- 46
- 47
- 48
- 49
- 50
- 51
- 52
- 53
- 54
- 55
- 56
- 57
- 58
- 59
- 60



- 1
  - 2
  - 3
  - 4
  - 5
  - 6
  - 7
  - 8
  - 9
  - 10
  - 11
  - 12
  - 13
  - 14
  - 15
  - 16
  - 17
  - 18
  - 19
  - 20
  - 21
  - 22
  - 23
  - 24
  - 25
  - 26
  - 27
  - 28
  - 29
  - 30
  - 31
  - 32
  - 33
  - 34
  - 35
  - 36
  - 37
  - 38
  - 39
  - 40
  - 41
  - 42
  - 43
  - 44
  - 45
  - 46
  - 47
  - 48
  - 49
  - 50
  - 51
  - 52
  - 53
  - 54
  - 55
  - 56
  - 57
  - 58
  - 59
  - 60
56. Parasuraman A, Zeithaml VA, Berry LL. SERVQUAL: A multiple-item scale for measuring consumer perceptions of service quality. *Journal of Retailing* 1988;64:12-40.
57. Roter D. An exploration of health education's responsibility for a partnership model of client-provider relations. *Patient Educ Couns* 1987;9(1):25-31.
58. Roter DL, Stewart M, Putnam SM, Lipkin M, Jr., Stiles W, Inui TS. Communication patterns of primary care physicians. *JAMA* 1997;277(4):350-356.
59. Schaufeli WB, Leiter MP, Maslach C. Burnout: 35 years of research and practice. *Career Development International* 2009;14(3):204-220.
60. Podsakoff PM, MacKenzie SB, Lee JY, Podsakoff NP. Common method biases in behavioral research: a critical review of the literature and recommended remedies. *J Appl Psychol* 2003;88(5):879-903.
61. Fahrenkopf AM, Sectish TC, Barger LK, et al. Rates of medication errors among depressed and burnt out residents: prospective cohort study. *BMJ* 2008;336(7642):488-491.
62. West CP, Tan AD, Habermann TM, Sloan JA, Shanafelt TD. Association of resident fatigue and distress with perceived medical errors. *JAMA* 2009;302(12):1294-1300.
63. Nissen SB, Magidson T, Gross K, Bergstrom CT. Publication Bias and the Cannonization of False Facts. *arXiv:1609.00494v1 [physics.soc-ph]* 2016.
64. Martin JL, Perez V, Sacristan M, Alvarez E. Is grey literature essential for a better control of publication bias in psychiatry? An example from three meta-analyses of schizophrenia. *Eur Psychiatry* 2005;20(8):550-553.

## FIGURES, TABLES AND SUPPLEMENTARY FILES LEGEND

Figure 1. Flowchart of Accepted/ Rejected Articles

Figure 2. Summary of Risk of Bias Across Studies

Table 1. Study Descriptions and Reported Patient Safety and Acceptability Related Quality of Care Outcomes

Supplementary File 1: PRISMA Checklist

Supplementary File 2: Search Terms Used in Search Strategy

Supplementary File 3: Risk of Bias Assessment Checklist

1  
2  
3  
4  
5  
6  
7  
8  
9  
10  
11  
12  
13  
14  
15  
16  
17  
18  
19  
20  
21  
22  
23  
24  
25  
26  
27  
28  
29  
30  
31  
32  
33  
34  
35  
36  
37  
38  
39  
40  
41  
42  
43  
44  
45  
46  
47  
48  
49  
50  
51  
52  
53  
54  
55  
56  
57  
58  
59  
60

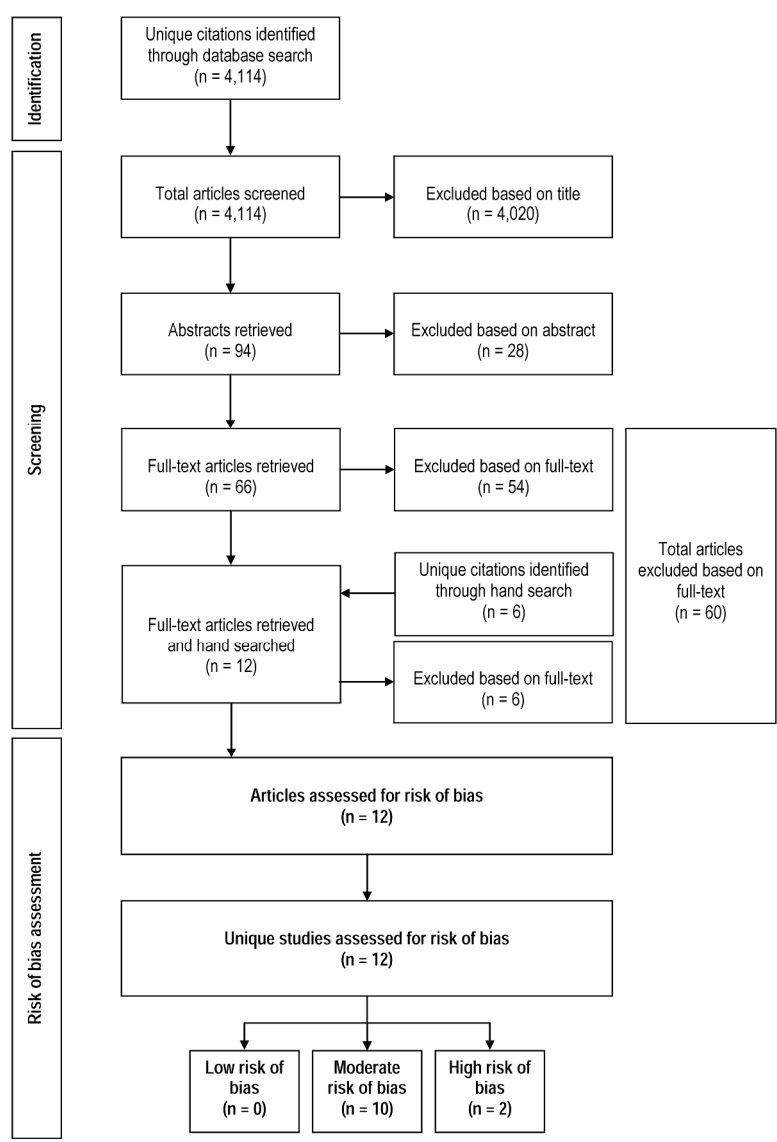

Figure 1. Flowchart of Accepted/ Rejected Articles

279x361mm (300 x 300 DPI)



1  
2  
3  
4  
5  
6  
7  
8  
9  
10  
11  
12  
13  
14  
15  
16  
17  
18  
19  
20  
21  
22  
23  
24  
25  
26  
27  
28  
29  
30  
31  
32  
33  
34  
35  
36  
37  
38  
39  
40  
41  
42  
43  
44  
45  
46  
47  
48  
49  
50  
51  
52  
53  
54  
55  
56  
57  
58  
59  
60

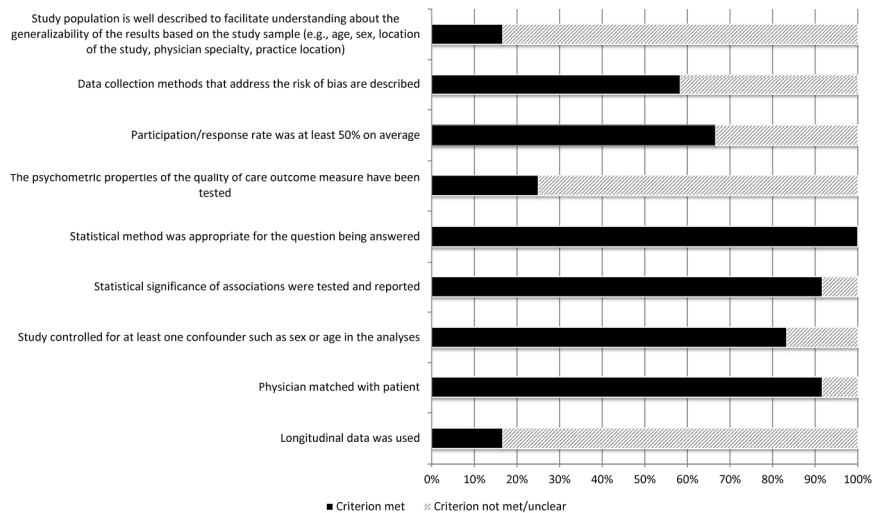

Figure 2. Summary of Risk of Bias Across Studies

215x166mm (300 x 300 DPI)

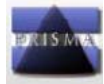

# PRISMA 2009 Checklist

| Section/topic                      | #  | Checklist item                                                                                                                                                                                                                                                                                              | Reported on page #   |
|------------------------------------|----|-------------------------------------------------------------------------------------------------------------------------------------------------------------------------------------------------------------------------------------------------------------------------------------------------------------|----------------------|
| <b>TITLE</b>                       |    |                                                                                                                                                                                                                                                                                                             |                      |
| Title                              | 1  | Identify the report as a systematic review, meta-analysis, or both.                                                                                                                                                                                                                                         | 1                    |
| <b>ABSTRACT</b>                    |    |                                                                                                                                                                                                                                                                                                             |                      |
| Structured summary                 | 2  | Provide a structured summary including, as applicable: background; objectives; data sources; study eligibility criteria, participants, and interventions; study appraisal and synthesis methods; results; limitations; conclusions and implications of key findings; systematic review registration number. | 2                    |
| <b>INTRODUCTION</b>                |    |                                                                                                                                                                                                                                                                                                             |                      |
| Rationale                          | 3  | Describe the rationale for the review in the context of what is already known.                                                                                                                                                                                                                              | 4-5                  |
| Objectives                         | 4  | Provide an explicit statement of questions being addressed with reference to participants, interventions, comparisons, outcomes, and study design (PICOS).                                                                                                                                                  | 4-5                  |
| <b>METHODS</b>                     |    |                                                                                                                                                                                                                                                                                                             |                      |
| Protocol and registration          | 5  | Indicate if a review protocol exists, if and where it can be accessed (e.g., Web address), and, if available, provide registration information including registration number.                                                                                                                               | N/A                  |
| Eligibility criteria               | 6  | Specify study characteristics (e.g., PICOS, length of follow-up) and report characteristics (e.g., years considered, language, publication status) used as criteria for eligibility, giving rationale.                                                                                                      | 7-10                 |
| Information sources                | 7  | Describe all information sources (e.g., databases with dates of coverage, contact with study authors to identify additional studies) in the search and date last searched.                                                                                                                                  | 7                    |
| Search                             | 8  | Present full electronic search strategy for at least one database, including any limits used, such that it could be repeated.                                                                                                                                                                               | 7-11<br>Supp. File 1 |
| Study selection                    | 9  | State the process for selecting studies (i.e., screening, eligibility, included in systematic review, and, if applicable, included in the meta-analysis).                                                                                                                                                   | 9-11                 |
| Data collection process            | 10 | Describe method of data extraction from reports (e.g., piloted forms, independently, in duplicate) and any processes for obtaining and confirming data from investigators.                                                                                                                                  | N/A                  |
| Data items                         | 11 | List and define all variables for which data were sought (e.g., PICOS, funding sources) and any assumptions and simplifications made.                                                                                                                                                                       | 9-11                 |
| Risk of bias in individual studies | 12 | Describe methods used for assessing risk of bias of individual studies (including specification of whether this was done at the study or outcome level), and how this information is to be used in any data synthesis.                                                                                      | 10-11                |
| Summary measures                   | 13 | State the principal summary measures (e.g., risk ratio, difference in means).                                                                                                                                                                                                                               | N/A                  |
| Synthesis of results               | 14 | Describe the methods of handling data and combining results of studies, if done, including measures of consistency (e.g., $I^2$ ) for each meta-analysis.                                                                                                                                                   | N/A                  |

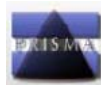

# PRISMA 2009 Checklist

| Section/topic                 | #  | Checklist item                                                                                                                                                                                           | Reported on page #  |
|-------------------------------|----|----------------------------------------------------------------------------------------------------------------------------------------------------------------------------------------------------------|---------------------|
| Risk of bias across studies   | 15 | Specify any assessment of risk of bias that may affect the cumulative evidence (e.g., publication bias, selective reporting within studies).                                                             | 10-11               |
| Additional analyses           | 16 | Describe methods of additional analyses (e.g., sensitivity or subgroup analyses, meta-regression), if done, indicating which were pre-specified.                                                         | N/A                 |
| <b>RESULTS</b>                |    |                                                                                                                                                                                                          |                     |
| Study selection               | 17 | Give numbers of studies screened, assessed for eligibility, and included in the review, with reasons for exclusions at each stage, ideally with a flow diagram.                                          | 11, Fig. 1          |
| Study characteristics         | 18 | For each study, present characteristics for which data were extracted (e.g., study size, PICOS, follow-up period) and provide the citations.                                                             | 12-25, Table 1      |
| Risk of bias within studies   | 19 | Present data on risk of bias of each study and, if available, any outcome level assessment (see item 12).                                                                                                | 11-12, Supp. File 2 |
| Results of individual studies | 20 | For all outcomes considered (benefits or harms), present, for each study: (a) simple summary data for each intervention group (b) effect estimates and confidence intervals, ideally with a forest plot. | 25-27, Table 1      |
| Synthesis of results          | 21 | Present results of each meta-analysis done, including confidence intervals and measures of consistency.                                                                                                  | N/A                 |
| Risk of bias across studies   | 22 | Present results of any assessment of risk of bias across studies (see Item 15).                                                                                                                          | 11-12, Fig. 2       |
| Additional analysis           | 23 | Give results of additional analyses, if done (e.g., sensitivity or subgroup analyses, meta-regression [see Item 16]).                                                                                    | N/A                 |
| <b>DISCUSSION</b>             |    |                                                                                                                                                                                                          |                     |
| Summary of evidence           | 24 | Summarize the main findings including the strength of evidence for each main outcome; consider their relevance to key groups (e.g., healthcare providers, users, and policy makers).                     | 27-28               |
| Limitations                   | 25 | Discuss limitations at study and outcome level (e.g., risk of bias), and at review-level (e.g., incomplete retrieval of identified research, reporting bias).                                            | 28-30               |
| Conclusions                   | 26 | Provide a general interpretation of the results in the context of other evidence, and implications for future research.                                                                                  | 31                  |
| <b>FUNDING</b>                |    |                                                                                                                                                                                                          |                     |
| Funding                       | 27 | Describe sources of funding for the systematic review and other support (e.g., supply of data); role of funders for the systematic review.                                                               | 32                  |

From: Moher D, Liberati A, Tetzlaff J, Altman DG, The PRISMA Group (2009). Preferred Reporting Items for Systematic Reviews and Meta-Analyses: The PRISMA Statement. PLoS Med 6(6): e1000097. doi:10.1371/journal.pmed1000097

For more information, visit: [www.prisma-statement.org](http://www.prisma-statement.org).

## Search terms used in search strategy

| Database           | Search Terms                                                                                                                                                                                                                                                                                                                                                                                                                                                                                                                                                                                                                                                                                                                                                                                                                                                                                                                                                                                                                                                                                                                                                                                                                                                                                                                                                                                                                                                                                                                                                                                                                                                                                                                                                                                                                                                                                                                                                                                                                                                                                                                                                                                                                                                                                                                                                                                                                                                                                                                                                                                                                                                                                                                                                                                                                                                                                                                                                                                                                                                                                                                                                                                                                                                                                                                                                                                                                                                                                                                                                                                                                                                                                                                                                                                                                                                                                                                                                                                                                                                                                                                                                                                                                                                                                                                                                                                                                                                                                                                                                                                                                                                                                                                                                                                                                                                                                                                                                   |
|--------------------|----------------------------------------------------------------------------------------------------------------------------------------------------------------------------------------------------------------------------------------------------------------------------------------------------------------------------------------------------------------------------------------------------------------------------------------------------------------------------------------------------------------------------------------------------------------------------------------------------------------------------------------------------------------------------------------------------------------------------------------------------------------------------------------------------------------------------------------------------------------------------------------------------------------------------------------------------------------------------------------------------------------------------------------------------------------------------------------------------------------------------------------------------------------------------------------------------------------------------------------------------------------------------------------------------------------------------------------------------------------------------------------------------------------------------------------------------------------------------------------------------------------------------------------------------------------------------------------------------------------------------------------------------------------------------------------------------------------------------------------------------------------------------------------------------------------------------------------------------------------------------------------------------------------------------------------------------------------------------------------------------------------------------------------------------------------------------------------------------------------------------------------------------------------------------------------------------------------------------------------------------------------------------------------------------------------------------------------------------------------------------------------------------------------------------------------------------------------------------------------------------------------------------------------------------------------------------------------------------------------------------------------------------------------------------------------------------------------------------------------------------------------------------------------------------------------------------------------------------------------------------------------------------------------------------------------------------------------------------------------------------------------------------------------------------------------------------------------------------------------------------------------------------------------------------------------------------------------------------------------------------------------------------------------------------------------------------------------------------------------------------------------------------------------------------------------------------------------------------------------------------------------------------------------------------------------------------------------------------------------------------------------------------------------------------------------------------------------------------------------------------------------------------------------------------------------------------------------------------------------------------------------------------------------------------------------------------------------------------------------------------------------------------------------------------------------------------------------------------------------------------------------------------------------------------------------------------------------------------------------------------------------------------------------------------------------------------------------------------------------------------------------------------------------------------------------------------------------------------------------------------------------------------------------------------------------------------------------------------------------------------------------------------------------------------------------------------------------------------------------------------------------------------------------------------------------------------------------------------------------------------------------------------------------------------------------------------------------|
| Medline Current    | <p>[exp Burnout, Professional/ OR burnout.mp. OR (burnout adj3 effect\$.mp.)] AND [exp Physicians/ OR exp Psychiatry/ OR allergist\$.mp. OR anesthesiologist\$.mp. OR cardiologist\$.mp. OR clinical pharmacologist\$.mp. OR clinical toxicologist\$.mp. OR dermatologist\$.mp. OR doctor\$.mp. OR endocrinologist\$.mp. OR gastroenterologist\$.mp. OR gynecologist\$.mp. OR hematologist\$.mp. OR immunologist\$.mp. OR medical biochemist\$.mp. OR medical geneticist\$.mp. OR medical microbiologist\$.mp. OR nephrologist\$.mp. OR neurologist\$.mp. OR neuropathologist\$.mp. OR neuroradiologist\$.mp. OR occupational physician\$.mp. OR oncologist\$.mp. OR ophthalmologist\$.mp. OR pathologist\$.mp. OR pediatrician\$.mp. OR physician\$.mp. OR psychiatrist\$.mp. OR radiologist\$.mp. OR rheumatologist\$.mp. OR surgeon\$.mp. OR urologist\$.mp.] AND [exp Diagnostic Errors/ OR exp Medical Errors/ OR exp Medication Errors/ OR exp "Quality of Health Care"/ OR exp Quality Assurance, Health Care/ OR misdiag\$.mp. OR (diagnos\$ adj3 error\$.mp. OR (medical\$ adj3 error\$.mp. OR (medication\$ adj3 error\$.mp. OR (drug\$ adj3 error\$.mp. OR (mistak\$ adj3 medic\$.mp. OR (surgic\$ adj3 error\$.mp. OR (quality\$ adj3 health\$ adj3 care\$.mp. OR (quality\$ adj3 healthcare\$.mp. OR (quality\$ adj3 of adj3 care\$.mp. OR exp Professional Competence/ OR (professional\$ adj3 competenc\$.mp. OR (technical\$ adj3 expertise\$.mp. OR (expertise\$ adj3 generaliz\$.mp. OR professionalism\$.mp. OR exp Treatment Outcome/ OR (treat\$ adj3 outcome\$.mp. OR (patient\$ adj3 outcome\$.mp. OR exp Professional Impairment/ OR (impair\$ adj3 physician\$.mp. OR (impair\$ adj3 doctor\$.mp. OR (disruptive\$ adj3 behav\$.mp. OR exp Safety/ OR safe\$.mp. OR exp Risk/ OR risk\$.mp. OR exp Patient Satisfaction/ OR (patient\$ adj3 satisf\$.mp. OR (client\$ adj3 satisf\$.mp. OR exp Professional-Patient Relations/ OR (professional\$ adj3 patient\$ adj3 relation\$.mp. OR (client\$ adj3 contact\$.mp. OR exp Physician-Patient Relations/ OR (physician\$ adj3 patient\$ adj3 relation\$.mp. OR (doctor\$ adj3 patient\$ adj3 relation\$.mp. OR exp Communication/ OR communicat\$.mp. OR misinform\$.mp. OR exp Health Communication/ OR exp "Attitude of Health Personnel"/ OR attitude\$.mp. OR exp Clinical Competence/ OR (clinical\$ adj3 competenc\$.mp. OR (clinical\$ adj3 skill\$.mp. OR exp Patient-Centered Care/ OR (patient\$ adj3 cent\$ adj3 care\$.mp. OR (patient\$ adj3 focus\$ adj3 care\$.mp. OR exp Empathy/ OR empath\$.mp. OR exp Patient Care/ OR (patient\$ adj3 care\$.mp. OR (informal\$ adj3 care\$.mp. OR exp "Standard of Care"/ OR (standard\$ adj3 care\$.mp. OR st.fs. [standards - floating subheading] OR exp Self Efficacy/ OR efficacy\$.mp. OR exp Clinical Audit/ OR audit\$.mp. OR exp Medical Audit/ OR (diagnos\$ adj3 mistak\$.mp. OR (medication\$ adj3 mistak\$.mp. OR (drug\$ adj3 mistak\$.mp. OR (surgic\$ adj3 mistak\$.mp. OR exp Safety Management/ OR (program\$ adj3 hazard\$ adj3 surveillance\$.mp. OR (management\$ adj3 safety\$.mp. OR (hazard\$ adj3 control\$.mp. OR (hazard\$ adj3 management\$.mp. OR exp Malpractice/ OR malpractic\$.mp. OR negligenc\$.mp. OR exp Morbidity/ OR morbidity\$.mp. OR exp Postoperative Complications/ OR (postoperative\$ adj3 complication\$.mp. OR exp Cross Infection/ OR (nosocomial\$ adj3 infection\$.mp. OR (hospital\$ adj3 infection\$.mp. OR (cross\$ adj3 infection\$.mp. OR exp Physician's Practice Patterns/ OR (practice\$ adj3 pattern\$ adj3 clinical\$.mp. OR (practice\$ adj3 pattern\$ adj3 physician\$.mp. OR (prescribing\$ adj3 pattern\$ adj3 physician\$.mp. OR (practice\$ adj3 pattern\$ adj3 professional\$.mp. OR (practice\$ adj3 pattern\$ adj3 variation\$.mp. OR (practice\$ adj3 clinical\$ adj3 variation\$.mp. OR (practice\$ adj3 medical\$ adj3 variation\$.mp. OR exp Mortality/ OR (rate\$ adj3 age-specific\$ adj3 death\$.mp. OR (rate\$ adj3 death\$.mp. OR (rate\$ adj3 fatalit\$.mp. OR mortalit\$.mp. OR exp "Outcome Assessment (Health Care)"/ OR (measure\$ adj3 outcome\$.mp. OR (assessment\$ adj3 outcome\$.mp. OR (research\$ adj3 outcome\$.mp. OR (stud\$ adj3 outcome\$.mp. OR (assessment\$ adj3 patient\$ adj3 outcome\$.mp. OR (research\$ adj3 patient\$ adj3 outcome\$.mp. OR exp Risk Reduction Behavior/ OR exp Risk-Taking/ OR exp "Root Cause Analysis"/ OR (cause\$ adj3 root\$ adj3 analys\$.mp. OR exp "Drug-Related Side Effects and Adverse Reactions"/ OR (drug\$ adj3 side\$ adj3 effect\$.mp. OR (drug\$ adj3 toxic\$.mp. OR (drug\$ adj3 reaction\$ adj3 adverse\$.mp. OR (drug\$ adj3 event\$ adj3 adverse\$.mp. OR ae.fs. [adverse effects floating subheading] OR mo.fs. [mortality floating subheading] OR po.fs. [poisoning floating subheading] OR to.fs. [toxicity floating subheading] OR in.fs. [injuries floating subheading]]</p> |
| Medline In-process | <p>[exp Burnout, Professional/ OR burnout.mp. OR (burnout adj3 effect\$.mp.)] AND [exp Physicians/ OR exp Psychiatry/ OR allergist\$.mp. OR anesthesiologist\$.mp. OR cardiologist\$.mp. OR clinical pharmacologist\$.mp. OR clinical toxicologist\$.mp. OR dermatologist\$.mp. OR doctor\$.mp. OR endocrinologist\$.mp. OR gastroenterologist\$.mp. OR gynecologist\$.mp. OR hematologist\$.mp. OR immunologist\$.mp. OR medical biochemist\$.mp. OR medical geneticist\$.mp. OR medical microbiologist\$.mp. OR nephrologist\$.mp. OR neurologist\$.mp. OR neuropathologist\$.mp. OR neuroradiologist\$.mp. OR occupational physician\$.mp. OR oncologist\$.mp. OR ophthalmologist\$.mp. OR pathologist\$.mp. OR pediatrician\$.mp. OR physician\$.mp. OR psychiatrist\$.mp. OR radiologist\$.mp. OR rheumatologist\$.mp. OR surgeon\$.mp. OR urologist\$.mp.] AND [exp Diagnostic Errors/ OR exp Medical Errors/ OR exp Medication Errors/ OR exp "Quality of Health Care"/ OR exp Quality Assurance, Health Care/ OR misdiag\$.mp. OR (diagnos\$ adj3 error\$.mp. OR (medical\$ adj3 error\$.mp. OR (medication\$ adj3 error\$.mp. OR (drug\$ adj3 error\$.mp. OR (mistak\$ adj3 medic\$.mp. OR (surgic\$ adj3 error\$.mp. OR (quality\$ adj3 health\$ adj3 care\$.mp. OR (quality\$ adj3 healthcare\$.mp. OR (quality\$ adj3 of adj3 care\$.mp. OR exp Professional Competence/ OR (professional\$ adj3 competenc\$.mp. OR (technical\$ adj3 expertise\$.mp. OR (expertise\$ adj3 generaliz\$.mp. OR professionalism\$.mp. OR exp Treatment Outcome/ OR (treat\$ adj3 outcome\$.mp. OR (patient\$ adj3 outcome\$.mp. OR exp Professional Impairment/ OR (impair\$ adj3 physician\$.mp. OR (impair\$ adj3 doctor\$.mp. OR (disruptive\$ adj3 behav\$.mp. OR exp Safety/ OR safe\$.mp. OR exp Risk/ OR risk\$.mp. OR exp Patient Satisfaction/ OR (patient\$ adj3 satisf\$.mp. OR (client\$ adj3 satisf\$.mp. OR exp Professional-Patient Relations/ OR (professional\$ adj3 patient\$ adj3 relation\$.mp. OR (client\$ adj3 contact\$.mp. OR exp Physician-Patient Relations/ OR (physician\$ adj3 patient\$ adj3 relation\$.mp. OR (doctor\$ adj3 patient\$ adj3 relation\$.mp. OR exp Communication/ OR communicat\$.mp. OR misinform\$.mp. OR exp Health Communication/ OR exp "Attitude of Health Personnel"/ OR attitude\$.mp. OR exp Clinical Competence/ OR (clinical\$ adj3 competenc\$.mp. OR (clinical\$ adj3 skill\$.mp. OR exp Patient-</p>                                                                                                                                                                                                                                                                                                                                                                                                                                                                                                                                                                                                                                                                                                                                                                                                                                                                                                                                                                                                                                                                                                                                                                                                                                                                                                                                                                                                                                                                                                                                                                                                                                                                                                                                                                                                                                                                                                                                                                                                                                                                                                                                                                                                                                                                                                                                                                                                                                                                                                    |

| Database                             | Search Terms                                                                                                                                                                                                                                                                                                                                                                                                                                                                                                                                                                                                                                                                                                                                                                                                                                                                                                                                                                                                                                                                                                                                                                                                                                                                                                                                                                                                                                                                                                                                                                                                                                                                                                                                                                                                                                                                                                                                                                                                                                                                                                                                                                                                                                                                                                                                                                                                                                                                                                                                                                                                                                                                                                                                                                                                                                                                                                                                                                                                                                                                                                                                                                                                                                                                                                                                                                                                                                                                                                                                                                                                                                                                                                                                                                                                                                                                                                                                                                                                                                                                                                                                                                                                                                                                                                                                                                                                                                                                                                                                                                                                                                                                                                                                                                                                                                                                                                                                                                                                                |
|--------------------------------------|-----------------------------------------------------------------------------------------------------------------------------------------------------------------------------------------------------------------------------------------------------------------------------------------------------------------------------------------------------------------------------------------------------------------------------------------------------------------------------------------------------------------------------------------------------------------------------------------------------------------------------------------------------------------------------------------------------------------------------------------------------------------------------------------------------------------------------------------------------------------------------------------------------------------------------------------------------------------------------------------------------------------------------------------------------------------------------------------------------------------------------------------------------------------------------------------------------------------------------------------------------------------------------------------------------------------------------------------------------------------------------------------------------------------------------------------------------------------------------------------------------------------------------------------------------------------------------------------------------------------------------------------------------------------------------------------------------------------------------------------------------------------------------------------------------------------------------------------------------------------------------------------------------------------------------------------------------------------------------------------------------------------------------------------------------------------------------------------------------------------------------------------------------------------------------------------------------------------------------------------------------------------------------------------------------------------------------------------------------------------------------------------------------------------------------------------------------------------------------------------------------------------------------------------------------------------------------------------------------------------------------------------------------------------------------------------------------------------------------------------------------------------------------------------------------------------------------------------------------------------------------------------------------------------------------------------------------------------------------------------------------------------------------------------------------------------------------------------------------------------------------------------------------------------------------------------------------------------------------------------------------------------------------------------------------------------------------------------------------------------------------------------------------------------------------------------------------------------------------------------------------------------------------------------------------------------------------------------------------------------------------------------------------------------------------------------------------------------------------------------------------------------------------------------------------------------------------------------------------------------------------------------------------------------------------------------------------------------------------------------------------------------------------------------------------------------------------------------------------------------------------------------------------------------------------------------------------------------------------------------------------------------------------------------------------------------------------------------------------------------------------------------------------------------------------------------------------------------------------------------------------------------------------------------------------------------------------------------------------------------------------------------------------------------------------------------------------------------------------------------------------------------------------------------------------------------------------------------------------------------------------------------------------------------------------------------------------------------------------------------------------------------------------|
|                                      | <p>Centered Care/ OR (patient\$ adj3 cent\$ adj3 care\$).mp. OR (patient\$ adj3 focus\$ adj3 care\$).mp. OR exp Empathy/ OR empath\$.mp. OR exp Patient Care/ OR (patient\$ adj3 care\$).mp. OR (informal\$ adj3 care\$).mp. OR exp "Standard of Care"/ OR (standard\$ adj3 care\$).mp. OR st.fs. [standards - floating subheading] OR exp Self Efficacy/ OR efficacy\$.mp. OR exp Clinical Audit/ OR audit\$.mp. OR exp Medical Audit/ OR (diagnos\$ adj3 mistak\$).mp. OR (medication\$ adj3 mistak\$).mp. OR (drug\$ adj3 mistak\$).mp. OR (surgic\$ adj3 mistak\$).mp. OR exp Safety Management/ OR (program\$ adj3 hazard\$ adj3 surveillance\$).mp. OR (management\$ adj3 safety\$).mp. OR (hazard\$ adj3 control\$).mp. OR (hazard\$ adj3 management\$).mp. OR exp Malpractice/ OR malpractic\$.mp. OR negligenc\$.mp. OR exp Morbidity/ OR morbidity\$.mp. OR exp Postoperative Complications/ OR (postoperative\$ adj3 complication\$).mp. OR exp Cross Infection/ OR (nosocomial\$ adj3 infection\$).mp. OR (hospital\$ adj3 infection\$).mp. OR (cross\$ adj3 infection\$).mp. OR exp Physician's Practice Patterns/ OR (practice\$ adj3 pattern\$ adj3 clinical\$).mp. OR (practice\$ adj3 pattern\$ adj3 physician\$).mp. OR (prescribing\$ adj3 pattern\$ adj3 physician\$).mp. OR (practice\$ adj3 pattern\$ adj3 professional\$).mp. OR (practice\$ adj3 pattern\$ adj3 variation\$).mp. OR (practice\$ adj3 clinical\$ adj3 variation\$).mp. OR (practice\$ adj3 medical\$ adj3 variation\$).mp. OR exp Mortality/ OR (rate\$ adj3 age-specific\$ adj3 death\$).mp. OR (rate\$ adj3 death\$).mp. OR (rate\$ adj3 fatalit\$).mp. OR mortalit\$.mp. OR exp "Outcome Assessment (Health Care)"/ OR (measure\$ adj3 outcome\$).mp. OR (assessment\$ adj3 outcome\$).mp. OR (research\$ adj3 outcome\$).mp. OR (stud\$ adj3 outcome\$).mp. OR (assessment\$ adj3 patient\$ adj3 outcome\$).mp. OR (research\$ adj3 patient\$ adj3 outcome\$).mp. OR exp Risk Reduction Behavior/ OR exp Risk-Taking/ OR exp "Root Cause Analysis"/ OR (cause\$ adj3 root\$ adj3 analys\$).mp. OR exp "Drug-Related Side Effects and Adverse Reactions"/ OR (drug\$ adj3 side\$ adj3 effect\$).mp. OR (drug\$ adj3 toxic\$).mp. OR (drug\$ adj3 reaction\$ adj3 adverse\$).mp. OR (drug\$ adj3 event\$ adj3 adverse\$).mp. OR ae.fs. [adverse effects floating subheading] OR mo.fs. [mortality floating subheading] OR po.fs. [poisoning floating subheading] OR to.fs. [toxicity floating subheading] OR in.fs. [injuries floating subheading]</p>                                                                                                                                                                                                                                                                                                                                                                                                                                                                                                                                                                                                                                                                                                                                                                                                                                                                                                                                                                                                                                                                                                                                                                                                                                                                                                                                                                                                                                                                                                                                                                                                                                                                                                                                                                                                                                                                                                                                                                                                                                                                                                                                                                                                                                                                                                                                                                                                                                                                             |
| Medline<br>Epub<br>Ahead of<br>Print | <p>[exp Burnout, Professional/ OR burnout.mp. OR (burnout adj3 effect\$.mp.) AND [exp Physicians/ OR exp Psychiatry/ OR allergist\$.mp. OR anesthesiologist\$.mp. OR cardiologist\$.mp. OR clinical pharmacologist\$.mp. OR clinical toxicologist\$.mp. OR dermatologist\$.mp. OR doctor\$.mp. OR endocrinologist\$.mp. OR gastroenterologist\$.mp. OR gynecologist\$.mp. OR hematologist\$.mp. OR immunologist\$.mp. OR medical biochemist\$.mp. OR medical geneticist\$.mp. OR medical microbiologist\$.mp. OR nephrologist\$.mp. OR neurologist\$.mp. OR neuropathologist\$.mp. OR neuroradiologist\$.mp. OR occupational physician\$.mp. OR oncologist\$.mp. OR ophthalmologist\$.mp. OR pathologist\$.mp. OR pediatrician\$.mp. OR physician\$.mp. OR psychiatrist\$.mp. OR radiologist\$.mp. OR rheumatologist\$.mp. OR surgeon\$.mp. OR urologist\$.mp.] AND [exp Diagnostic Errors/ OR exp Medical Errors/ OR exp Medication Errors/ OR exp "Quality of Health Care"/ OR exp Quality Assurance, Health Care/ OR misdiag\$.mp. OR (diagnos\$ adj3 error\$).mp. OR (medical\$ adj3 error\$).mp. OR (medication\$ adj3 error\$).mp. OR (drug\$ adj3 error\$).mp. OR (mistak\$ adj3 medic\$).mp. OR (surgic\$ adj3 error\$).mp. OR (quality\$ adj3 health\$ adj3 care\$).mp. OR (quality\$ adj3 healthcare\$).mp. OR (quality\$ adj3 of adj3 care\$).mp. OR exp Professional Competence/ OR (professional\$ adj3 competenc\$).mp. OR (technical\$ adj3 expertise\$).mp. OR (expertise\$ adj3 generaliz\$).mp. OR professionalism\$.mp. OR exp Treatment Outcome/ OR (treat\$ adj3 outcome\$).mp. OR (patient\$ adj3 outcome\$).mp. OR exp Professional Impairment/ OR (impair\$ adj3 physician\$).mp. OR (impair\$ adj3 doctor\$).mp. OR (disruptive\$ adj3 behav\$).mp. OR exp Safety/ OR safe\$.mp. OR exp Risk/ OR risk\$.mp. OR exp Patient Satisfaction/ OR (patient\$ adj3 satisf\$).mp. OR (client\$ adj3 satisf\$).mp. OR exp Professional-Patient Relations/ OR (professional\$ adj3 patient\$ adj3 relation\$).mp. OR (client\$ adj3 contact\$).mp. OR exp Physician-Patient Relations/ OR (physician\$ adj3 patient\$ adj3 relation\$).mp. OR (doctor\$ adj3 patient\$ adj3 relation\$).mp. OR exp Communication/ OR communicat\$.mp. OR misinform\$.mp. OR exp Health Communication/ OR exp "Attitude of Health Personnel"/ OR attitude\$.mp. OR exp Clinical Competence/ OR (clinical\$ adj3 competenc\$).mp. OR (clinical\$ adj3 skill\$).mp. OR exp Patient-Centered Care/ OR (patient\$ adj3 cent\$ adj3 care\$).mp. OR (patient\$ adj3 focus\$ adj3 care\$).mp. OR exp Empathy/ OR empath\$.mp. OR exp Patient Care/ OR (patient\$ adj3 care\$).mp. OR (informal\$ adj3 care\$).mp. OR exp "Standard of Care"/ OR (standard\$ adj3 care\$).mp. OR st.fs. [standards - floating subheading] OR exp Self Efficacy/ OR efficacy\$.mp. OR exp Clinical Audit/ OR audit\$.mp. OR exp Medical Audit/ OR (diagnos\$ adj3 mistak\$).mp. OR (medication\$ adj3 mistak\$).mp. OR (drug\$ adj3 mistak\$).mp. OR (surgic\$ adj3 mistak\$).mp. OR exp Safety Management/ OR (program\$ adj3 hazard\$ adj3 surveillance\$).mp. OR (management\$ adj3 safety\$).mp. OR (hazard\$ adj3 control\$).mp. OR (hazard\$ adj3 management\$).mp. OR exp Malpractice/ OR malpractic\$.mp. OR negligenc\$.mp. OR exp Morbidity/ OR morbidity\$.mp. OR exp Postoperative Complications/ OR (postoperative\$ adj3 complication\$).mp. OR exp Cross Infection/ OR (nosocomial\$ adj3 infection\$).mp. OR (hospital\$ adj3 infection\$).mp. OR (cross\$ adj3 infection\$).mp. OR exp Physician's Practice Patterns/ OR (practice\$ adj3 pattern\$ adj3 clinical\$).mp. OR (practice\$ adj3 pattern\$ adj3 physician\$).mp. OR (prescribing\$ adj3 pattern\$ adj3 physician\$).mp. OR (practice\$ adj3 pattern\$ adj3 professional\$).mp. OR (practice\$ adj3 pattern\$ adj3 variation\$).mp. OR (practice\$ adj3 clinical\$ adj3 variation\$).mp. OR (practice\$ adj3 medical\$ adj3 variation\$).mp. OR exp Mortality/ OR (rate\$ adj3 age-specific\$ adj3 death\$).mp. OR (rate\$ adj3 death\$).mp. OR (rate\$ adj3 fatalit\$).mp. OR mortalit\$.mp. OR exp "Outcome Assessment (Health Care)"/ OR (measure\$ adj3 outcome\$).mp. OR (assessment\$ adj3 outcome\$).mp. OR (research\$ adj3 outcome\$).mp. OR (stud\$ adj3 outcome\$).mp. OR (assessment\$ adj3 patient\$ adj3 outcome\$).mp. OR (research\$ adj3 patient\$ adj3 outcome\$).mp. OR exp Risk Reduction Behavior/ OR exp Risk-Taking/ OR exp "Root Cause Analysis"/ OR (cause\$ adj3 root\$ adj3 analys\$).mp. OR exp "Drug-Related Side Effects and Adverse Reactions"/ OR (drug\$ adj3 side\$ adj3 effect\$).mp. OR (drug\$ adj3 toxic\$).mp. OR (drug\$ adj3 reaction\$ adj3 adverse\$).mp. OR (drug\$ adj3 event\$ adj3 adverse\$).mp. OR ae.fs. [adverse effects floating subheading] OR mo.fs. [mortality floating subheading] OR po.fs. [poisoning floating subheading] OR to.fs. [toxicity floating subheading] OR in.fs. [injuries floating subheading]</p> |



| Database  | Search Terms                                                                                                                                                                                                                                                                                                                                                                                                                                                                                                                                                                                                                                                                                                                                                                                                                                                                                                                                                                                                                                                                                                                                                                                                                                                                                                                                                                                                                                                                                                                                                                                                                                                                                                                                                                                                                                                                                                                                                                                                                                                                                                                                                                                                                                                                                                                                                                                                                                                                                                                                                                                                                                                                                                                                                                                                                                                                                                                                                                                                                                                                                                                                                                                                                                                                                                                                                                                                                                                                                                                                                                                                                                                                                                                                                                                                                                                                                                                                                                                                                                                                                                                                                                                                                                                                                                                                                                                                                                                                                                                                                                                                                                                                                                                                                                                                                                                                                                                                                                                                                                                                          |
|-----------|---------------------------------------------------------------------------------------------------------------------------------------------------------------------------------------------------------------------------------------------------------------------------------------------------------------------------------------------------------------------------------------------------------------------------------------------------------------------------------------------------------------------------------------------------------------------------------------------------------------------------------------------------------------------------------------------------------------------------------------------------------------------------------------------------------------------------------------------------------------------------------------------------------------------------------------------------------------------------------------------------------------------------------------------------------------------------------------------------------------------------------------------------------------------------------------------------------------------------------------------------------------------------------------------------------------------------------------------------------------------------------------------------------------------------------------------------------------------------------------------------------------------------------------------------------------------------------------------------------------------------------------------------------------------------------------------------------------------------------------------------------------------------------------------------------------------------------------------------------------------------------------------------------------------------------------------------------------------------------------------------------------------------------------------------------------------------------------------------------------------------------------------------------------------------------------------------------------------------------------------------------------------------------------------------------------------------------------------------------------------------------------------------------------------------------------------------------------------------------------------------------------------------------------------------------------------------------------------------------------------------------------------------------------------------------------------------------------------------------------------------------------------------------------------------------------------------------------------------------------------------------------------------------------------------------------------------------------------------------------------------------------------------------------------------------------------------------------------------------------------------------------------------------------------------------------------------------------------------------------------------------------------------------------------------------------------------------------------------------------------------------------------------------------------------------------------------------------------------------------------------------------------------------------------------------------------------------------------------------------------------------------------------------------------------------------------------------------------------------------------------------------------------------------------------------------------------------------------------------------------------------------------------------------------------------------------------------------------------------------------------------------------------------------------------------------------------------------------------------------------------------------------------------------------------------------------------------------------------------------------------------------------------------------------------------------------------------------------------------------------------------------------------------------------------------------------------------------------------------------------------------------------------------------------------------------------------------------------------------------------------------------------------------------------------------------------------------------------------------------------------------------------------------------------------------------------------------------------------------------------------------------------------------------------------------------------------------------------------------------------------------------------------------------------------------------------------------------|
| PsyclINFO | <p>[burnout.mp. OR (burnout adj3 effect\$.mp.) AND [exp physicians/ OR exp clinicians/ OR exp Psychiatry/ OR allergist\$.mp. OR anesthesiologist\$.mp. OR cardiologist\$.mp. OR clinical pharmacologist\$.mp. OR clinical toxicologist\$.mp. OR dermatologist\$.mp. OR doctor\$.mp. OR endocrinologist\$.mp. OR gastroenterologist\$.mp. OR gynecologist\$.mp. OR hematologist\$.mp. OR immunologist\$.mp. OR medical biochemist\$.mp. OR medical geneticist\$.mp. OR medical microbiologist\$.mp. OR nephrologist\$.mp. OR neurologist\$.mp. OR neuropathologist\$.mp. OR neuroradiologist\$.mp. OR occupational physician\$.mp. OR oncologist\$.mp. OR ophthalmologist\$.mp. OR pathologist\$.mp. OR pediatrician\$.mp. OR physician\$.mp. OR psychiatrist\$.mp. OR radiologist\$.mp. OR rheumatologist\$.mp. OR surgeon\$.mp. OR urologist\$.mp.] AND [exp Errors/ OR exp "Quality of Care"/ OR misdiag\$.mp. OR (diagnos\$ adj3 error\$.mp. OR (medical\$ adj3 error\$.mp. OR (medication\$ adj3 error\$.mp. OR (drug\$ adj3 error\$.mp. OR (mistak\$ adj3 medic\$.mp. OR (surgic\$ adj3 error\$.mp. OR (quality\$ adj3 health\$ adj3 care\$.mp. OR (quality\$ adj3 healthcare\$.mp. OR (quality\$ adj3 of adj3 care\$.mp. OR exp Professional Competence/ OR (professional\$ adj3 competenc\$.mp. OR (technical\$ adj3 expertise\$.mp. OR (expertise\$ adj3 generaliz\$.mp. OR professionalism\$.mp. OR exp Treatment Outcome/ OR (treat\$ adj3 outcome\$.mp. OR (patient\$ adj3 outcome\$.mp. OR exp Impaired Professionals/ OR (impair\$ adj3 physician\$.mp. OR (impair\$ adj3 doctor\$.mp. OR (disruptive\$ adj3 behav\$.mp. OR exp Safety/ OR safe\$.mp. OR exp Risk Factors/ OR exp Risk Management/ OR exp Risk Assessment/ OR risk\$.mp. OR exp Client Satisfaction/ OR (patient\$ adj3 satisf\$.mp. OR (client\$ adj3 satisf\$.mp. OR exp Therapeutic Processes/ OR (professional\$ adj3 patient\$ adj3 relation\$.mp. OR (client\$ adj3 contact\$.mp. OR (physician\$ adj3 patient\$ adj3 relation\$.mp. OR (doctor\$ adj3 patient\$ adj3 relation\$.mp. OR exp Communication/ OR communicat\$.mp. OR misinform\$.mp. OR exp Communication Skills/ OR exp Communication Barriers/ OR exp Health Personnel Attitudes/ OR attitude\$.mp. OR exp Competence/ OR (clinical\$ adj3 competenc\$.mp. OR (clinical\$ adj3 skill\$.mp. OR exp Client Centered Therapy/ OR (patient\$ adj3 cent\$ adj3 care\$.mp. OR (patient\$ adj3 focus\$ adj3 care\$.mp. OR exp Empathy/ OR empath\$.mp. OR exp Patients/ OR (patient\$ adj3 care\$.mp. OR (informal\$ adj3 care\$.mp. OR exp Professional Standards/ OR (standard\$ adj3 care\$.mp. OR exp Self Efficacy/ OR efficacy\$.mp. OR exp Clinical Audits/ OR audit\$.mp. OR (diagnos\$ adj3 mistak\$.mp. OR (medication\$ adj3 mistak\$.mp. OR (drug\$ adj3 mistak\$.mp. OR (surgic\$ adj3 mistak\$.mp. OR (program\$ adj3 hazard\$ adj3 surveillance\$.mp. OR (management\$ adj3 safety\$.mp. OR (hazard\$ adj3 control\$.mp. OR (hazard\$ adj3 management\$.mp. OR exp Professional Liability/ OR malpractic\$.mp. OR negligenc\$.mp. OR exp Morbidity/ OR morbidit\$.mp. OR exp Postoperative Complications/ OR (postoperative\$ adj3 complication\$.mp. OR (nosocomial\$ adj3 infection\$.mp. OR (hospital\$ adj3 infection\$.mp. OR (cross\$ adj3 infection\$.mp. OR exp Clinical Practice/ OR (practice\$ adj3 pattern\$ adj3 clinical\$.mp. OR (practice\$ adj3 pattern\$ adj3 physician\$.mp. OR (prescribing\$ adj3 pattern\$ adj3 physician\$.mp. OR (practice\$ adj3 pattern\$ adj3 professional\$.mp. OR (practice\$ adj3 pattern\$ adj3 variation\$.mp. OR (practice\$ adj3 clinical\$ adj3 variation\$.mp. OR (practice\$ adj3 medical\$ adj3 variation\$.mp. OR exp Mortality Rate/ OR exp "Death and Dying"/ OR (rate\$ adj3 age-specific\$ adj3 death\$.mp. OR (rate\$ adj3 death\$.mp. OR (rate\$ adj3 fatalit\$.mp. OR mortalit\$.mp. OR exp Treatment Effectiveness Evaluation/ OR (measure\$ adj3 outcome\$.mp. OR (assessment\$ adj3 outcome\$.mp. OR (research\$ adj3 outcome\$.mp. OR (stud\$ adj3 outcome\$.mp. OR (assessment\$ adj3 patient\$ adj3 outcome\$.mp. OR (research\$ adj3 patient\$ adj3 outcome\$.mp. OR exp Risk-Taking/ OR exp Error Analysis/ OR (cause\$ adj3 root\$ adj3 analys\$.mp. OR exp "Side Effects (Drug)"/ OR (drug\$ adj3 side\$ adj3 effect\$.mp. OR (drug\$ adj3 toxic\$.mp. OR (drug\$ adj3 reaction\$ adj3 adverse\$.mp. OR (drug\$ adj3 event\$ adj3 adverse\$.mp. OR exp Toxic Disorders/ OR exp Injuries/ OR 3620.cc. [Personnel Management &amp; Selection &amp; Training classification code] OR 3630.cc. [Personnel Evaluation &amp; Job Performance classification code] OR 3650.cc. [Personnel Attitudes &amp; Job Satisfaction classification code] OR 3670.cc. [Working Conditions &amp; Industrial Safety classification code] OR 3430.cc. [Professional Personnel Attitudes &amp; Characteristics classification code] OR 3450.cc. [Professional Ethics &amp; Standards &amp; Liability code] OR 3470.cc. [Impaired Professionals classification code]]</p> |
| Embase    | <p>[exp Burnout/ OR burnout.mp. OR (burnout adj3 effect\$.mp.) AND [exp Physicians/ OR exp Psychiatry/ OR allergist\$.mp. OR anesthesiologist\$.mp. OR cardiologist\$.mp. OR clinical pharmacologist\$.mp. OR clinical toxicologist\$.mp. OR dermatologist\$.mp. OR doctor\$.mp. OR endocrinologist\$.mp. OR gastroenterologist\$.mp. OR gynecologist\$.mp. OR hematologist\$.mp. OR immunologist\$.mp. OR medical biochemist\$.mp. OR medical geneticist\$.mp. OR medical microbiologist\$.mp. OR nephrologist\$.mp. OR neurologist\$.mp. OR neuropathologist\$.mp. OR neuroradiologist\$.mp. OR occupational physician\$.mp. OR oncologist\$.mp. OR ophthalmologist\$.mp. OR pathologist\$.mp. OR pediatrician\$.mp. OR physician\$.mp. OR psychiatrist\$.mp. OR radiologist\$.mp. OR rheumatologist\$.mp. OR surgeon\$.mp. OR urologist\$.mp.] AND [exp Diagnostic Errors/ OR exp Medical Errors/ OR exp Medication Errors/ OR exp Health care quality/ OR exp Quality control/ OR misdiag\$.mp. OR (diagnos\$ adj3 error\$.mp. OR (medical\$ adj3 error\$.mp. OR (medication\$ adj3 error\$.mp. OR (drug\$ adj3 error\$.mp. OR (mistak\$ adj3 medic\$.mp. OR (surgic\$ adj3 error\$.mp. OR (quality\$ adj3 health\$ adj3 care\$.mp. OR (quality\$ adj3 healthcare\$.mp. OR (quality\$ adj3 of adj3 care\$.mp. OR exp Professional Competence/ OR (professional\$ adj3 competenc\$.mp. OR (technical\$ adj3 expertise\$.mp. OR (expertise\$ adj3 generaliz\$.mp. OR professionalism\$.mp. OR exp Treatment Outcome/ OR (treat\$ adj3 outcome\$.mp. OR (patient\$ adj3 outcome\$.mp. OR exp Malpractice/ OR (impair\$ adj3 physician\$.mp. OR (impair\$ adj3 doctor\$.mp. OR (disruptive\$ adj3 behav\$.mp. OR exp Safety/ OR safe\$.mp. OR exp Risk OR exp Risk Factors/ OR exp Risk Assessment/ OR exp Risk Management/ OR risk\$.mp. OR exp patient satisfaction/ OR (patient\$ adj3 satisf\$.mp. OR (client\$ adj3 satisf\$.mp. OR exp human relation/ OR (professional\$ adj3 patient\$ adj3 relation\$.mp. OR (client\$ adj3 contact\$.mp. OR exp doctor patient relation/ OR (physician\$ adj3 patient\$ adj3 relation\$.mp. OR (doctor\$ adj3 patient\$ adj3 relation\$.mp. OR exp interpersonal communication/ OR communicat\$.mp. OR misinform\$.mp. OR exp communication disorder/ OR exp communication skill/ OR exp health personnel attitude/ OR attitude\$.mp. OR exp clinical competence/ OR (clinical\$ adj3 competenc\$.mp. OR (clinical\$ adj3 skill\$.mp. OR exp patient care/ OR (patient\$ adj3 cent\$ adj3 care\$.mp. OR (patient\$ adj3 focus\$ adj3 care\$.mp. OR exp Empathy/ OR empath\$.mp. OR exp medical care/ OR (patient\$ adj3 care\$.mp. OR (informal\$ adj3 care\$.mp. OR exp professional standard/ OR (standard\$ adj3 care\$.mp. OR exp standard/ OR exp Self Efficacy/ OR efficacy\$.mp. OR exp medical</p>                                                                                                                                                                                                                                                                                                                                                                                                                                                                                                                                                                                                                                                                                                                                                                                                                                                                                                                                                                                                                                                                                                                                                                                                                                                                                                                                                                                                                                                                                                                                                                                                                                                                                                                                                                                                                                                                                                                                                                                                                                                                                                                                                                                                                                  |

| Database       | Search Terms                                                                                                                                                                                                                                                                                                                                                                                                                                                                                                                                                                                                                                                                                                                                                                                                                                                                                                                                                                                                                                                                                                                                                                                                                                                                                                                                                                                                                                                                                                                                                                                                                                                                                                                                                                                                                                                                                                                                                                                                             |
|----------------|--------------------------------------------------------------------------------------------------------------------------------------------------------------------------------------------------------------------------------------------------------------------------------------------------------------------------------------------------------------------------------------------------------------------------------------------------------------------------------------------------------------------------------------------------------------------------------------------------------------------------------------------------------------------------------------------------------------------------------------------------------------------------------------------------------------------------------------------------------------------------------------------------------------------------------------------------------------------------------------------------------------------------------------------------------------------------------------------------------------------------------------------------------------------------------------------------------------------------------------------------------------------------------------------------------------------------------------------------------------------------------------------------------------------------------------------------------------------------------------------------------------------------------------------------------------------------------------------------------------------------------------------------------------------------------------------------------------------------------------------------------------------------------------------------------------------------------------------------------------------------------------------------------------------------------------------------------------------------------------------------------------------------|
|                | <p>audit/ OR audit\$.mp. OR (diagnos\$ adj3 mistak\$).mp. OR (medication\$ adj3 mistak\$).mp. OR (drug\$ adj3 mistak\$).mp. OR (surgic\$ adj3 mistak\$).mp. OR (program\$ adj3 hazard\$ adj3 surveillance\$).mp. OR (management\$ adj3 safety\$).mp. OR (hazard\$ adj3 control\$).mp. OR (hazard\$ adj3 management\$).mp. OR malpractic\$.mp. OR negligen\$.mp. OR exp Morbidity/ OR morbidity\$.mp. OR exp postoperative complication/ OR (postoperative\$ adj3 complication\$).mp. OR exp Cross Infection/ OR (nosocomial\$ adj3 infection\$).mp. OR (hospital\$ adj3 infection\$).mp. OR (cross\$ adj3 infection\$).mp. OR exp clinical practice/ OR exp professional practice/ OR (practice\$ adj3 pattern\$ adj3 clinical\$).mp. OR (practice\$ adj3 pattern\$ adj3 physicians\$).mp. OR (prescribing\$ adj3 pattern\$ adj3 physician\$).mp. OR (practice\$ adj3 pattern\$ adj3 professional\$).mp. OR (practice\$ adj3 pattern\$ adj3 variation\$).mp. OR (practice\$ adj3 clinical\$ adj3 variation\$).mp. OR (practice\$ adj3 medical\$ adj3 variation\$).mp. OR exp mortality/ OR exp death/ OR (rate\$ adj3 age-specific\$ adj3 death\$).mp. OR (rate\$ adj3 death\$).mp. OR (rate\$ adj3 fatalit\$).mp. OR mortalit\$.mp. OR exp outcome assessment/ OR (measure\$ adj3 outcome\$).mp. OR (assessment\$ adj3 outcome\$).mp. OR (research\$ adj3 outcome\$).mp. OR (stud\$ adj3 outcome\$).mp. OR (assessment\$ adj3 patient\$ adj3 outcome\$).mp. OR (research\$ adj3 patient\$ adj3 outcome\$).mp. OR exp risk reduction/ OR exp high risk behavior/ OR exp "root cause analysis"/ OR (cause\$ adj3 root\$ adj3 analys\$).mp. OR exp adverse drug reaction/ OR (drug\$ adj3 side\$ adj3 effect\$).mp. OR (drug\$ adj3 toxic\$).mp. OR (drug\$ adj3 reaction\$ adj3 adverse\$).mp. OR (drug\$ adj3 event\$ adj3 adverse\$).mp. OR ae.fs. [adverse drug reaction] OR to.fs. [drug toxicity] OR dt.fs. [drug interaction subheading] OR si.fs. [side effect subheading] OR co.fs. [complication subheading]</p> |
| Web of Science | <p>[burn out* OR burnout*] AND [physician* OR clinician* OR psychiatry* OR allergist* OR anesthesiologist* OR cardiologist* OR clinical pharmacologist* OR clinical toxicologist* OR dermatologist* OR doctor* OR endocrinologist* OR gastroenterologist* OR gynecologist* OR hematologist* OR immunologist* OR medical biochemist* OR medical geneticist* OR medical microbiologist* OR nephrologist* OR neurologist* OR neuropathologist* OR neuroradiologist* OR occupational physician* OR oncologist* OR ophthalmologist* OR pathologist* OR pediatrician* OR physician* OR psychiatrist* OR radiologist* OR rheumatologist* OR surgeon* OR urologist* OR consultant*] AND [error* OR health* care* OR healthcare* OR quality* OR misdiag* OR mistak* OR competenc* OR expertis* OR professionalism* OR outcome* OR impair* OR disruptive* OR safe* OR risk* OR satisf* OR relation* OR contact* OR communicat* OR misinform* OR attitude* OR skill* OR care* OR empath* OR standard* OR audit* OR hazard* OR malpractic* OR negligen* OR morbidity* OR infection* OR practice* pattern* OR prescrib* pattern* OR mortalit* OR death* OR fatalit* OR drug* OR adverse* OR poison* OR toxic* OR injur*]</p>                                                                                                                                                                                                                                                                                                                                                                                                                                                                                                                                                                                                                                                                                                                                                                                                          |

### Risk of Bias Assessment Checklist

| Author(s)                                   | 1 | 2 | 3 | 4 | 5 | 6 | 7 | 8 | 9 | Total Score |
|---------------------------------------------|---|---|---|---|---|---|---|---|---|-------------|
| Anagnostopoulos et al. (2012) <sup>31</sup> | 0 | 1 | 1 | 1 | 1 | 1 | 1 | 1 | 0 | 7           |
| Halbesleben et al. (2008) <sup>32</sup>     | 0 | 0 | 1 | 0 | 1 | 1 | 1 | 1 | 0 | 5           |
| Hayashino et al. (2012) <sup>30</sup>       | 0 | 1 | 1 | 0 | 1 | 1 | 1 | 1 | 1 | 7           |
| Klein et al. (2010) <sup>5</sup>            | 1 | 0 | 1 | 0 | 1 | 1 | 1 | 1 | 0 | 6           |
| Rabatin et al. (2016) <sup>29</sup>         | 1 | 0 | 1 | 0 | 1 | 0 | 1 | 1 | 1 | 6           |
| Ratanawongsa et al. (2008) <sup>33</sup>    | 0 | 1 | 0 | 1 | 1 | 1 | 1 | 1 | 0 | 6           |
| Shanafelt et al. (2010) <sup>42</sup>       | 0 | 1 | 0 | 0 | 1 | 1 | 1 | 1 | 0 | 5           |
| Shirom et al. (2006) <sup>43</sup>          | 0 | 0 | 1 | 0 | 1 | 1 | 1 | 1 | 0 | 5           |
| Travado et al. (2005) <sup>34</sup>         | 0 | 1 | 0 | 0 | 1 | 1 | 0 | 1 | 0 | 4           |
| Weigl et al. (2015) <sup>45</sup>           | 0 | 1 | 1 | 0 | 1 | 1 | 1 | 1 | 0 | 6           |
| Wen et al. (2016) <sup>46</sup>             | 0 | 0 | 1 | 0 | 1 | 1 | 1 | 0 | 0 | 4           |
| Weng et al. (2011) <sup>35</sup>            | 0 | 1 | 0 | 1 | 1 | 1 | 0 | 1 | 0 | 5           |

### Risk of Bias Assessment Criteria

1. Study population is well described to facilitate understanding about the generalizability of the results based on the study sample (e.g., age, sex, location of the study, physician specialty, practice location)
2. Data collection methods that address the risk of bias are described
3. Participation/response rate was at least 50% on average
4. The psychometric properties of the quality of care outcome measure have been tested
5. Statistical method was appropriate for the question being answered
6. Statistical significance of associations were tested and reported
7. Study controlled for at least one confounder such as sex or age in the analyses
8. Physician matched with patient
9. Longitudinal data was used
