# Supplementary material for: The relationship between physician burnout and quality of healthcare in terms of safety and acceptability: a systematic review
Source: PubMed Central journal article supplement — BMJ Open. 2017 Jun 21;7(6):e015141. doi: 10.1136/bmjopen-2016-015141 (PMC5734243; doi:10.1136/bmjopen-2016-015141), 2017-06-21
Supplement: bmjopen-2016-015141supp002.pdf [file bmjopen-2016-015141supp002.pdf]

## Search terms used in search strategy

| Database           | Search Terms                                                                                                                                                                                                                                                                                                                                                                                                                                                                                                                                                                                                                                                                                                                                                                                                                                                                                                                                                                                                                                                                                                                                                                                                                                                                                                                                                                                                                                                                                                                                                                                                                                                                                                                                                                                                                                                                                                                                                                                                                                                                                                                                                                                                                                                                                                                                                                                                                                                                                                                                                                                                                                                                                                                                                                                                                                                                                                                                                                                                                                                                                                                                                                                                                                                                                                                                                                                                                                                                                                                                                                                                                                                                                                                                                                                                                                                                                                                                                                                                                                                                                                                                                                                                                                                                                                                                                                                                                                                                                                                                                                                                                                                                                                                                                                                                                                                                                                                                                    |
|--------------------|-----------------------------------------------------------------------------------------------------------------------------------------------------------------------------------------------------------------------------------------------------------------------------------------------------------------------------------------------------------------------------------------------------------------------------------------------------------------------------------------------------------------------------------------------------------------------------------------------------------------------------------------------------------------------------------------------------------------------------------------------------------------------------------------------------------------------------------------------------------------------------------------------------------------------------------------------------------------------------------------------------------------------------------------------------------------------------------------------------------------------------------------------------------------------------------------------------------------------------------------------------------------------------------------------------------------------------------------------------------------------------------------------------------------------------------------------------------------------------------------------------------------------------------------------------------------------------------------------------------------------------------------------------------------------------------------------------------------------------------------------------------------------------------------------------------------------------------------------------------------------------------------------------------------------------------------------------------------------------------------------------------------------------------------------------------------------------------------------------------------------------------------------------------------------------------------------------------------------------------------------------------------------------------------------------------------------------------------------------------------------------------------------------------------------------------------------------------------------------------------------------------------------------------------------------------------------------------------------------------------------------------------------------------------------------------------------------------------------------------------------------------------------------------------------------------------------------------------------------------------------------------------------------------------------------------------------------------------------------------------------------------------------------------------------------------------------------------------------------------------------------------------------------------------------------------------------------------------------------------------------------------------------------------------------------------------------------------------------------------------------------------------------------------------------------------------------------------------------------------------------------------------------------------------------------------------------------------------------------------------------------------------------------------------------------------------------------------------------------------------------------------------------------------------------------------------------------------------------------------------------------------------------------------------------------------------------------------------------------------------------------------------------------------------------------------------------------------------------------------------------------------------------------------------------------------------------------------------------------------------------------------------------------------------------------------------------------------------------------------------------------------------------------------------------------------------------------------------------------------------------------------------------------------------------------------------------------------------------------------------------------------------------------------------------------------------------------------------------------------------------------------------------------------------------------------------------------------------------------------------------------------------------------------------------------------------------------------------|
| Medline Current    | <p>[exp Burnout, Professional/ OR burnout.mp. OR (burnout adj3 effect\$.mp.)] AND [exp Physicians/ OR exp Psychiatry/ OR allergist\$.mp. OR anesthesiologist\$.mp. OR cardiologist\$.mp. OR clinical pharmacologist\$.mp. OR clinical toxicologist\$.mp. OR dermatologist\$.mp. OR doctor\$.mp. OR endocrinologist\$.mp. OR gastroenterologist\$.mp. OR gynecologist\$.mp. OR hematologist\$.mp. OR immunologist\$.mp. OR medical biochemist\$.mp. OR medical geneticist\$.mp. OR medical microbiologist\$.mp. OR nephrologist\$.mp. OR neurologist\$.mp. OR neuropathologist\$.mp. OR neuroradiologist\$.mp. OR occupational physician\$.mp. OR oncologist\$.mp. OR ophthalmologist\$.mp. OR pathologist\$.mp. OR pediatrician\$.mp. OR physician\$.mp. OR psychiatrist\$.mp. OR radiologist\$.mp. OR rheumatologist\$.mp. OR surgeon\$.mp. OR urologist\$.mp.] AND [exp Diagnostic Errors/ OR exp Medical Errors/ OR exp Medication Errors/ OR exp "Quality of Health Care"/ OR exp Quality Assurance, Health Care/ OR misdiag\$.mp. OR (diagnos\$ adj3 error\$.mp. OR (medical\$ adj3 error\$.mp. OR (medication\$ adj3 error\$.mp. OR (drug\$ adj3 error\$.mp. OR (mistak\$ adj3 medic\$.mp. OR (surgic\$ adj3 error\$.mp. OR (quality\$ adj3 health\$ adj3 care\$.mp. OR (quality\$ adj3 healthcare\$.mp. OR (quality\$ adj3 of adj3 care\$.mp. OR exp Professional Competence/ OR (professional\$ adj3 competenc\$.mp. OR (technical\$ adj3 expertise\$.mp. OR (expertise\$ adj3 generaliz\$.mp. OR professionalism\$.mp. OR exp Treatment Outcome/ OR (treat\$ adj3 outcome\$.mp. OR (patient\$ adj3 outcome\$.mp. OR exp Professional Impairment/ OR (impair\$ adj3 physician\$.mp. OR (impair\$ adj3 doctor\$.mp. OR (disruptive\$ adj3 behav\$.mp. OR exp Safety/ OR safe\$.mp. OR exp Risk/ OR risk\$.mp. OR exp Patient Satisfaction/ OR (patient\$ adj3 satisf\$.mp. OR (client\$ adj3 satisf\$.mp. OR exp Professional-Patient Relations/ OR (professional\$ adj3 patient\$ adj3 relation\$.mp. OR (client\$ adj3 contact\$.mp. OR exp Physician-Patient Relations/ OR (physician\$ adj3 patient\$ adj3 relation\$.mp. OR (doctor\$ adj3 patient\$ adj3 relation\$.mp. OR exp Communication/ OR communicat\$.mp. OR misinform\$.mp. OR exp Health Communication/ OR exp "Attitude of Health Personnel"/ OR attitude\$.mp. OR exp Clinical Competence/ OR (clinical\$ adj3 competenc\$.mp. OR (clinical\$ adj3 skill\$.mp. OR exp Patient-Centered Care/ OR (patient\$ adj3 cent\$ adj3 care\$.mp. OR (patient\$ adj3 focus\$ adj3 care\$.mp. OR exp Empathy/ OR empath\$.mp. OR exp Patient Care/ OR (patient\$ adj3 care\$.mp. OR (informal\$ adj3 care\$.mp. OR exp "Standard of Care"/ OR (standard\$ adj3 care\$.mp. OR st.fs. [standards - floating subheading] OR exp Self Efficacy/ OR efficacy\$.mp. OR exp Clinical Audit/ OR audit\$.mp. OR exp Medical Audit/ OR (diagnos\$ adj3 mistak\$.mp. OR (medication\$ adj3 mistak\$.mp. OR (drug\$ adj3 mistak\$.mp. OR (surgic\$ adj3 mistak\$.mp. OR exp Safety Management/ OR (program\$ adj3 hazard\$ adj3 surveillance\$.mp. OR (management\$ adj3 safety\$.mp. OR (hazard\$ adj3 control\$.mp. OR (hazard\$ adj3 management\$.mp. OR exp Malpractice/ OR malpractic\$.mp. OR negligenc\$.mp. OR exp Morbidity/ OR morbidity\$.mp. OR exp Postoperative Complications/ OR (postoperative\$ adj3 complication\$.mp. OR exp Cross Infection/ OR (nosocomial\$ adj3 infection\$.mp. OR (hospital\$ adj3 infection\$.mp. OR (cross\$ adj3 infection\$.mp. OR exp Physician's Practice Patterns/ OR (practice\$ adj3 pattern\$ adj3 clinical\$.mp. OR (practice\$ adj3 pattern\$ adj3 physician\$.mp. OR (prescribing\$ adj3 pattern\$ adj3 physician\$.mp. OR (practice\$ adj3 pattern\$ adj3 professional\$.mp. OR (practice\$ adj3 pattern\$ adj3 variation\$.mp. OR (practice\$ adj3 clinical\$ adj3 variation\$.mp. OR (practice\$ adj3 medical\$ adj3 variation\$.mp. OR exp Mortality/ OR (rate\$ adj3 age-specific\$ adj3 death\$.mp. OR (rate\$ adj3 death\$.mp. OR (rate\$ adj3 fatalit\$.mp. OR mortality\$.mp. OR exp "Outcome Assessment (Health Care)"/ OR (measure\$ adj3 outcome\$.mp. OR (assessment\$ adj3 outcome\$.mp. OR (research\$ adj3 outcome\$.mp. OR (stud\$ adj3 outcome\$.mp. OR (assessment\$ adj3 patient\$ adj3 outcome\$.mp. OR (research\$ adj3 patient\$ adj3 outcome\$.mp. OR exp Risk Reduction Behavior/ OR exp Risk-Taking/ OR exp "Root Cause Analysis"/ OR (cause\$ adj3 root\$ adj3 analys\$.mp. OR exp "Drug-Related Side Effects and Adverse Reactions"/ OR (drug\$ adj3 side\$ adj3 effect\$.mp. OR (drug\$ adj3 toxic\$.mp. OR (drug\$ adj3 reaction\$ adj3 adverse\$.mp. OR (drug\$ adj3 event\$ adj3 adverse\$.mp. OR ae.fs. [adverse effects floating subheading] OR mo.fs. [mortality floating subheading] OR po.fs. [poisoning floating subheading] OR to.fs. [toxicity floating subheading] OR in.fs. [injuries floating subheading]]</p> |
| Medline In-process | <p>[exp Burnout, Professional/ OR burnout.mp. OR (burnout adj3 effect\$.mp.)] AND [exp Physicians/ OR exp Psychiatry/ OR allergist\$.mp. OR anesthesiologist\$.mp. OR cardiologist\$.mp. OR clinical pharmacologist\$.mp. OR clinical toxicologist\$.mp. OR dermatologist\$.mp. OR doctor\$.mp. OR endocrinologist\$.mp. OR gastroenterologist\$.mp. OR gynecologist\$.mp. OR hematologist\$.mp. OR immunologist\$.mp. OR medical biochemist\$.mp. OR medical geneticist\$.mp. OR medical microbiologist\$.mp. OR nephrologist\$.mp. OR neurologist\$.mp. OR neuropathologist\$.mp. OR neuroradiologist\$.mp. OR occupational physician\$.mp. OR oncologist\$.mp. OR ophthalmologist\$.mp. OR pathologist\$.mp. OR pediatrician\$.mp. OR physician\$.mp. OR psychiatrist\$.mp. OR radiologist\$.mp. OR rheumatologist\$.mp. OR surgeon\$.mp. OR urologist\$.mp.] AND [exp Diagnostic Errors/ OR exp Medical Errors/ OR exp Medication Errors/ OR exp "Quality of Health Care"/ OR exp Quality Assurance, Health Care/ OR misdiag\$.mp. OR (diagnos\$ adj3 error\$.mp. OR (medical\$ adj3 error\$.mp. OR (medication\$ adj3 error\$.mp. OR (drug\$ adj3 error\$.mp. OR (mistak\$ adj3 medic\$.mp. OR (surgic\$ adj3 error\$.mp. OR (quality\$ adj3 health\$ adj3 care\$.mp. OR (quality\$ adj3 healthcare\$.mp. OR (quality\$ adj3 of adj3 care\$.mp. OR exp Professional Competence/ OR (professional\$ adj3 competenc\$.mp. OR (technical\$ adj3 expertise\$.mp. OR (expertise\$ adj3 generaliz\$.mp. OR professionalism\$.mp. OR exp Treatment Outcome/ OR (treat\$ adj3 outcome\$.mp. OR (patient\$ adj3 outcome\$.mp. OR exp Professional Impairment/ OR (impair\$ adj3 physician\$.mp. OR (impair\$ adj3 doctor\$.mp. OR (disruptive\$ adj3 behav\$.mp. OR exp Safety/ OR safe\$.mp. OR exp Risk/ OR risk\$.mp. OR exp Patient Satisfaction/ OR (patient\$ adj3 satisf\$.mp. OR (client\$ adj3 satisf\$.mp. OR exp Professional-Patient Relations/ OR (professional\$ adj3 patient\$ adj3 relation\$.mp. OR (client\$ adj3 contact\$.mp. OR exp Physician-Patient Relations/ OR (physician\$ adj3 patient\$ adj3 relation\$.mp. OR (doctor\$ adj3 patient\$ adj3 relation\$.mp. OR exp Communication/ OR communicat\$.mp. OR misinform\$.mp. OR exp Health Communication/ OR exp "Attitude of Health Personnel"/ OR attitude\$.mp. OR exp Clinical Competence/ OR (clinical\$ adj3 competenc\$.mp. OR (clinical\$ adj3 skill\$.mp. OR exp Patient-</p>                                                                                                                                                                                                                                                                                                                                                                                                                                                                                                                                                                                                                                                                                                                                                                                                                                                                                                                                                                                                                                                                                                                                                                                                                                                                                                                                                                                                                                                                                                                                                                                                                                                                                                                                                                                                                                                                                                                                                                                                                                                                                                                                                                                                                                                                                                                                                                                                                                                                                                     |

| Database                                       | Search Terms                                                                                                                                                                                                                                                                                                                                                                                                                                                                                                                                                                                                                                                                                                                                                                                                                                                                                                                                                                                                                                                                                                                                                                                                                                                                                                                                                                                                                                                                                                                                                                                                                                                                                                                                                                                                                                                                                                                                                                                                                                                                                                                                                                                                                                                                                                                                                                                                                                                                                                                                                                                                                                                                                                                                                                                                                                                                                                                                                                                                                                                                                                                                                                                                                                                                                                                                                                                                                                                                                                                                                                                                                                                                                                                                                                                                                                                                                                                                                                                                                                                                                                                                                                                                                                                                                                                                                                                                                                                                                                                                                                                                                                                                                                                                                                                                                                                                                                                                                                                                                   |
|------------------------------------------------|--------------------------------------------------------------------------------------------------------------------------------------------------------------------------------------------------------------------------------------------------------------------------------------------------------------------------------------------------------------------------------------------------------------------------------------------------------------------------------------------------------------------------------------------------------------------------------------------------------------------------------------------------------------------------------------------------------------------------------------------------------------------------------------------------------------------------------------------------------------------------------------------------------------------------------------------------------------------------------------------------------------------------------------------------------------------------------------------------------------------------------------------------------------------------------------------------------------------------------------------------------------------------------------------------------------------------------------------------------------------------------------------------------------------------------------------------------------------------------------------------------------------------------------------------------------------------------------------------------------------------------------------------------------------------------------------------------------------------------------------------------------------------------------------------------------------------------------------------------------------------------------------------------------------------------------------------------------------------------------------------------------------------------------------------------------------------------------------------------------------------------------------------------------------------------------------------------------------------------------------------------------------------------------------------------------------------------------------------------------------------------------------------------------------------------------------------------------------------------------------------------------------------------------------------------------------------------------------------------------------------------------------------------------------------------------------------------------------------------------------------------------------------------------------------------------------------------------------------------------------------------------------------------------------------------------------------------------------------------------------------------------------------------------------------------------------------------------------------------------------------------------------------------------------------------------------------------------------------------------------------------------------------------------------------------------------------------------------------------------------------------------------------------------------------------------------------------------------------------------------------------------------------------------------------------------------------------------------------------------------------------------------------------------------------------------------------------------------------------------------------------------------------------------------------------------------------------------------------------------------------------------------------------------------------------------------------------------------------------------------------------------------------------------------------------------------------------------------------------------------------------------------------------------------------------------------------------------------------------------------------------------------------------------------------------------------------------------------------------------------------------------------------------------------------------------------------------------------------------------------------------------------------------------------------------------------------------------------------------------------------------------------------------------------------------------------------------------------------------------------------------------------------------------------------------------------------------------------------------------------------------------------------------------------------------------------------------------------------------------------------------------------------------|
|                                                | <p>Centered Care/ OR (patient\$ adj3 cent\$ adj3 care\$).mp. OR (patient\$ adj3 focus\$ adj3 care\$).mp. OR exp Empathy/ OR empath\$.mp. OR exp Patient Care/ OR (patient\$ adj3 care\$).mp. OR (informal\$ adj3 care\$).mp. OR exp "Standard of Care"/ OR (standard\$ adj3 care\$).mp. OR st.fs. [standards - floating subheading] OR exp Self Efficacy/ OR efficacy\$.mp. OR exp Clinical Audit/ OR audit\$.mp. OR exp Medical Audit/ OR (diagnos\$ adj3 mistak\$).mp. OR (medication\$ adj3 mistak\$).mp. OR (drug\$ adj3 mistak\$).mp. OR (surgic\$ adj3 mistak\$).mp. OR exp Safety Management/ OR (program\$ adj3 hazard\$ adj3 surveillance\$).mp. OR (management\$ adj3 safety\$).mp. OR (hazard\$ adj3 control\$).mp. OR (hazard\$ adj3 management\$).mp. OR exp Malpractice/ OR malpractic\$.mp. OR negligenc\$.mp. OR exp Morbidity/ OR morbidity\$.mp. OR exp Postoperative Complications/ OR (postoperative\$ adj3 complication\$).mp. OR exp Cross Infection/ OR (nosocomial\$ adj3 infection\$).mp. OR (hospital\$ adj3 infection\$).mp. OR (cross\$ adj3 infection\$).mp. OR exp Physician's Practice Patterns/ OR (practice\$ adj3 pattern\$ adj3 clinical\$).mp. OR (practice\$ adj3 pattern\$ adj3 physician\$).mp. OR (prescribing\$ adj3 pattern\$ adj3 physician\$).mp. OR (practice\$ adj3 pattern\$ adj3 professional\$).mp. OR (practice\$ adj3 pattern\$ adj3 variation\$).mp. OR (practice\$ adj3 clinical\$ adj3 variation\$).mp. OR (practice\$ adj3 medical\$ adj3 variation\$).mp. OR exp Mortality/ OR (rate\$ adj3 age-specific\$ adj3 death\$).mp. OR (rate\$ adj3 death\$).mp. OR (rate\$ adj3 fatality\$).mp. OR mortality\$.mp. OR exp "Outcome Assessment (Health Care)"/ OR (measure\$ adj3 outcome\$).mp. OR (assessment\$ adj3 outcome\$).mp. OR (research\$ adj3 outcome\$).mp. OR (stud\$ adj3 outcome\$).mp. OR (assessment\$ adj3 patient\$ adj3 outcome\$).mp. OR (research\$ adj3 patient\$ adj3 outcome\$).mp. OR exp Risk Reduction Behavior/ OR exp Risk-Taking/ OR exp "Root Cause Analysis"/ OR (cause\$ adj3 root\$ adj3 analys\$).mp. OR exp "Drug-Related Side Effects and Adverse Reactions"/ OR (drug\$ adj3 side\$ adj3 effect\$).mp. OR (drug\$ adj3 toxic\$).mp. OR (drug\$ adj3 reaction\$ adj3 adverse\$).mp. OR (drug\$ adj3 event\$ adj3 adverse\$).mp. OR ae.fs. [adverse effects floating subheading] OR mo.fs. [mortality floating subheading] OR po.fs. [poisoning floating subheading] OR to.fs. [toxicity floating subheading] OR in.fs. [injuries floating subheading]]</p>                                                                                                                                                                                                                                                                                                                                                                                                                                                                                                                                                                                                                                                                                                                                                                                                                                                                                                                                                                                                                                                                                                                                                                                                                                                                                                                                                                                                                                                                                                                                                                                                                                                                                                                                                                                                                                                                                                                                                                                                                                                                                                                                                                                                                                                                                                                                                                                                                                                                             |
| <p>Medline<br/>Epub<br/>Ahead of<br/>Print</p> | <p>[exp Burnout, Professional/ OR burnout.mp. OR (burnout adj3 effect\$.mp.) AND [exp Physicians/ OR exp Psychiatry/ OR allergist\$.mp. OR anesthesiologist\$.mp. OR cardiologist\$.mp. OR clinical pharmacologist\$.mp. OR clinical toxicologist\$.mp. OR dermatologist\$.mp. OR doctor\$.mp. OR endocrinologist\$.mp. OR gastroenterologist\$.mp. OR gynecologist\$.mp. OR hematologist\$.mp. OR immunologist\$.mp. OR medical biochemist\$.mp. OR medical geneticist\$.mp. OR medical microbiologist\$.mp. OR nephrologist\$.mp. OR neurologist\$.mp. OR neuropathologist\$.mp. OR neuroradiologist\$.mp. OR occupational physician\$.mp. OR oncologist\$.mp. OR ophthalmologist\$.mp. OR pathologist\$.mp. OR pediatrician\$.mp. OR physician\$.mp. OR psychiatrist\$.mp. OR radiologist\$.mp. OR rheumatologist\$.mp. OR surgeon\$.mp. OR urologist\$.mp.] AND [exp Diagnostic Errors/ OR exp Medical Errors/ OR exp Medication Errors/ OR exp "Quality of Health Care"/ OR exp Quality Assurance, Health Care/ OR misdiag\$.mp. OR (diagnos\$ adj3 error\$).mp. OR (medical\$ adj3 error\$).mp. OR (medication\$ adj3 error\$).mp. OR (drug\$ adj3 error\$).mp. OR (mistak\$ adj3 medic\$).mp. OR (surgic\$ adj3 error\$).mp. OR (quality\$ adj3 health\$ adj3 care\$).mp. OR (quality\$ adj3 healthcare\$).mp. OR (quality\$ adj3 of adj3 care\$).mp. OR exp Professional Competence/ OR (professional\$ adj3 competenc\$).mp. OR (technical\$ adj3 expertise\$).mp. OR (expertise\$ adj3 generaliz\$).mp. OR professionalism\$.mp. OR exp Treatment Outcome/ OR (treat\$ adj3 outcome\$).mp. OR (patient\$ adj3 outcome\$).mp. OR exp Professional Impairment/ OR (impair\$ adj3 physician\$).mp. OR (impair\$ adj3 doctor\$).mp. OR (disruptive\$ adj3 behav\$).mp. OR exp Safety/ OR safe\$.mp. OR exp Risk/ OR risk\$.mp. OR exp Patient Satisfaction/ OR (patient\$ adj3 satisf\$).mp. OR (client\$ adj3 satisf\$).mp. OR exp Professional-Patient Relations/ OR (professional\$ adj3 patient\$ adj3 relation\$).mp. OR (client\$ adj3 contact\$).mp. OR exp Physician-Patient Relations/ OR (physician\$ adj3 patient\$ adj3 relation\$).mp. OR (doctor\$ adj3 patient\$ adj3 relation\$).mp. OR exp Communication/ OR communicat\$.mp. OR misinform\$.mp. OR exp Health Communication/ OR exp "Attitude of Health Personnel"/ OR attitude\$.mp. OR exp Clinical Competence/ OR (clinical\$ adj3 competenc\$).mp. OR (clinical\$ adj3 skill\$).mp. OR exp Patient-Centered Care/ OR (patient\$ adj3 cent\$ adj3 care\$).mp. OR (patient\$ adj3 focus\$ adj3 care\$).mp. OR exp Empathy/ OR empath\$.mp. OR exp Patient Care/ OR (patient\$ adj3 care\$).mp. OR (informal\$ adj3 care\$).mp. OR exp "Standard of Care"/ OR (standard\$ adj3 care\$).mp. OR st.fs. [standards - floating subheading] OR exp Self Efficacy/ OR efficacy\$.mp. OR exp Clinical Audit/ OR audit\$.mp. OR exp Medical Audit/ OR (diagnos\$ adj3 mistak\$).mp. OR (medication\$ adj3 mistak\$).mp. OR (drug\$ adj3 mistak\$).mp. OR (surgic\$ adj3 mistak\$).mp. OR exp Safety Management/ OR (program\$ adj3 hazard\$ adj3 surveillance\$).mp. OR (management\$ adj3 safety\$).mp. OR (hazard\$ adj3 control\$).mp. OR (hazard\$ adj3 management\$).mp. OR exp Malpractice/ OR malpractic\$.mp. OR negligenc\$.mp. OR exp Morbidity/ OR morbidity\$.mp. OR exp Postoperative Complications/ OR (postoperative\$ adj3 complication\$).mp. OR exp Cross Infection/ OR (nosocomial\$ adj3 infection\$).mp. OR (hospital\$ adj3 infection\$).mp. OR (cross\$ adj3 infection\$).mp. OR exp Physician's Practice Patterns/ OR (practice\$ adj3 pattern\$ adj3 clinical\$).mp. OR (practice\$ adj3 pattern\$ adj3 physician\$).mp. OR (prescribing\$ adj3 pattern\$ adj3 physician\$).mp. OR (practice\$ adj3 pattern\$ adj3 professional\$).mp. OR (practice\$ adj3 pattern\$ adj3 variation\$).mp. OR (practice\$ adj3 clinical\$ adj3 variation\$).mp. OR (practice\$ adj3 medical\$ adj3 variation\$).mp. OR exp Mortality/ OR (rate\$ adj3 age-specific\$ adj3 death\$).mp. OR (rate\$ adj3 death\$).mp. OR (rate\$ adj3 fatality\$).mp. OR mortality\$.mp. OR exp "Outcome Assessment (Health Care)"/ OR (measure\$ adj3 outcome\$).mp. OR (assessment\$ adj3 outcome\$).mp. OR (research\$ adj3 outcome\$).mp. OR (stud\$ adj3 outcome\$).mp. OR (assessment\$ adj3 patient\$ adj3 outcome\$).mp. OR (research\$ adj3 patient\$ adj3 outcome\$).mp. OR exp Risk Reduction Behavior/ OR exp Risk-Taking/ OR exp "Root Cause Analysis"/ OR (cause\$ adj3 root\$ adj3 analys\$).mp. OR exp "Drug-Related Side Effects and Adverse Reactions"/ OR (drug\$ adj3 side\$ adj3 effect\$).mp. OR (drug\$ adj3 toxic\$).mp. OR (drug\$ adj3 reaction\$ adj3 adverse\$).mp. OR (drug\$ adj3 event\$ adj3 adverse\$).mp. OR ae.fs. [adverse effects floating subheading] OR mo.fs. [mortality floating subheading] OR po.fs. [poisoning floating subheading] OR to.fs. [toxicity floating subheading] OR in.fs. [injuries floating subheading]]</p> |

| Database  | Search Terms                                                                                                                                                                                                                                                                                                                                                                                                                                                                                                                                                                                                                                                                                                                                                                                                                                                                                                                                                                                                                                                                                                                                                                                                                                                                                                                                                                                                                                                                                                                                                                                                                                                                                                                                                                                                                                                                                                                                                                                                                                                                                                                                                                                                                                                                                                                                                                                                                                                                                                                                                                                                                                                                                                                                                                                                                                                                                                                                                                                                                                                                                                                                                                                                                                                                                                                                                                                                                                                                                                                                                                                                                                                                                                                                                                                                                                                                                                                                                                                                                                                                                                                                                                                                                                                                                                                                                                                                                                                                                                                                                                                                                                                                                                                                                                                                                                                                                                                                                                                                                                                                             |
|-----------|------------------------------------------------------------------------------------------------------------------------------------------------------------------------------------------------------------------------------------------------------------------------------------------------------------------------------------------------------------------------------------------------------------------------------------------------------------------------------------------------------------------------------------------------------------------------------------------------------------------------------------------------------------------------------------------------------------------------------------------------------------------------------------------------------------------------------------------------------------------------------------------------------------------------------------------------------------------------------------------------------------------------------------------------------------------------------------------------------------------------------------------------------------------------------------------------------------------------------------------------------------------------------------------------------------------------------------------------------------------------------------------------------------------------------------------------------------------------------------------------------------------------------------------------------------------------------------------------------------------------------------------------------------------------------------------------------------------------------------------------------------------------------------------------------------------------------------------------------------------------------------------------------------------------------------------------------------------------------------------------------------------------------------------------------------------------------------------------------------------------------------------------------------------------------------------------------------------------------------------------------------------------------------------------------------------------------------------------------------------------------------------------------------------------------------------------------------------------------------------------------------------------------------------------------------------------------------------------------------------------------------------------------------------------------------------------------------------------------------------------------------------------------------------------------------------------------------------------------------------------------------------------------------------------------------------------------------------------------------------------------------------------------------------------------------------------------------------------------------------------------------------------------------------------------------------------------------------------------------------------------------------------------------------------------------------------------------------------------------------------------------------------------------------------------------------------------------------------------------------------------------------------------------------------------------------------------------------------------------------------------------------------------------------------------------------------------------------------------------------------------------------------------------------------------------------------------------------------------------------------------------------------------------------------------------------------------------------------------------------------------------------------------------------------------------------------------------------------------------------------------------------------------------------------------------------------------------------------------------------------------------------------------------------------------------------------------------------------------------------------------------------------------------------------------------------------------------------------------------------------------------------------------------------------------------------------------------------------------------------------------------------------------------------------------------------------------------------------------------------------------------------------------------------------------------------------------------------------------------------------------------------------------------------------------------------------------------------------------------------------------------------------------------------------------------------------------------------|
| PsyclINFO | <p>[burnout.mp. OR (burnout adj3 effect\$.mp.) AND [exp physicians/ OR exp clinicians/ OR exp Psychiatry/ OR allergist\$.mp. OR anesthesiologist\$.mp. OR cardiologist\$.mp. OR clinical pharmacologist\$.mp. OR clinical toxicologist\$.mp. OR dermatologist\$.mp. OR doctor\$.mp. OR endocrinologist\$.mp. OR gastroenterologist\$.mp. OR gynecologist\$.mp. OR hematologist\$.mp. OR immunologist\$.mp. OR medical biochemist\$.mp. OR medical geneticist\$.mp. OR medical microbiologist\$.mp. OR nephrologist\$.mp. OR neurologist\$.mp. OR neuropathologist\$.mp. OR neuroradiologist\$.mp. OR occupational physician\$.mp. OR oncologist\$.mp. OR ophthalmologist\$.mp. OR pathologist\$.mp. OR pediatrician\$.mp. OR physician\$.mp. OR psychiatrist\$.mp. OR radiologist\$.mp. OR rheumatologist\$.mp. OR surgeon\$.mp. OR urologist\$.mp.] AND [exp Errors/ OR exp "Quality of Care"/ OR misdiag\$.mp. OR (diagnos\$ adj3 error\$.mp. OR (medical\$ adj3 error\$.mp. OR (medication\$ adj3 error\$.mp. OR (drug\$ adj3 error\$.mp. OR (mistak\$ adj3 medic\$.mp. OR (surgic\$ adj3 error\$.mp. OR (quality\$ adj3 health\$ adj3 care\$.mp. OR (quality\$ adj3 healthcare\$.mp. OR (quality\$ adj3 of adj3 care\$.mp. OR exp Professional Competence/ OR (professional\$ adj3 competenc\$.mp. OR (technical\$ adj3 expertise\$.mp. OR (expertise\$ adj3 generaliz\$.mp. OR professionalism\$.mp. OR exp Treatment Outcome/ OR (treat\$ adj3 outcome\$.mp. OR (patient\$ adj3 outcome\$.mp. OR exp Impaired Professionals/ OR (impair\$ adj3 physician\$.mp. OR (impair\$ adj3 doctor\$.mp. OR (disruptive\$ adj3 behav\$.mp. OR exp Safety/ OR safe\$.mp. OR exp Risk Factors/ OR exp Risk Management/ OR exp Risk Assessment/ OR risk\$.mp. OR exp Client Satisfaction/ OR (patient\$ adj3 satisf\$.mp. OR (client\$ adj3 satisf\$.mp. OR exp Therapeutic Processes/ OR (professional\$ adj3 patient\$ adj3 relation\$.mp. OR (client\$ adj3 contact\$.mp. OR (physician\$ adj3 patient\$ adj3 relation\$.mp. OR (doctor\$ adj3 patient\$ adj3 relation\$.mp. OR exp Communication/ OR communicat\$.mp. OR misinform\$.mp. OR exp Communication Skills/ OR exp Communication Barriers/ OR exp Health Personnel Attitudes/ OR attitude\$.mp. OR exp Competence/ OR (clinical\$ adj3 competenc\$.mp. OR (clinical\$ adj3 skill\$.mp. OR exp Client Centered Therapy/ OR (patient\$ adj3 cent\$ adj3 care\$.mp. OR (patient\$ adj3 focus\$ adj3 care\$.mp. OR exp Empathy/ OR empath\$.mp. OR exp Patients/ OR (patient\$ adj3 care\$.mp. OR (informal\$ adj3 care\$.mp. OR exp Professional Standards/ OR (standard\$ adj3 care\$.mp. OR exp Self Efficacy/ OR efficacy\$.mp. OR exp Clinical Audits/ OR audit\$.mp. OR (diagnos\$ adj3 mistak\$.mp. OR (medication\$ adj3 mistak\$.mp. OR (drug\$ adj3 mistak\$.mp. OR (surgic\$ adj3 mistak\$.mp. OR (program\$ adj3 hazard\$ adj3 surveillance\$.mp. OR (management\$ adj3 safety\$.mp. OR (hazard\$ adj3 control\$.mp. OR (hazard\$ adj3 management\$.mp. OR exp Professional Liability/ OR malpractic\$.mp. OR negligenc\$.mp. OR exp Morbidity/ OR morbidity\$.mp. OR exp Postoperative Complications/ OR (postoperative\$ adj3 complication\$.mp. OR (nosocomial\$ adj3 infection\$.mp. OR (hospital\$ adj3 infection\$.mp. OR (cross\$ adj3 infection\$.mp. OR exp Clinical Practice/ OR (practice\$ adj3 pattern\$ adj3 clinical\$.mp. OR (practice\$ adj3 pattern\$ adj3 physician\$.mp. OR (prescribing\$ adj3 pattern\$ adj3 physician\$.mp. OR (practice\$ adj3 pattern\$ adj3 professional\$.mp. OR (practice\$ adj3 pattern\$ adj3 variation\$.mp. OR (practice\$ adj3 clinical\$ adj3 variation\$.mp. OR (practice\$ adj3 medical\$ adj3 variation\$.mp. OR exp Mortality Rate/ OR exp "Death and Dying"/ OR (rate\$ adj3 age-specific\$ adj3 death\$.mp. OR (rate\$ adj3 death\$.mp. OR (rate\$ adj3 fatality\$.mp. OR mortality\$.mp. OR exp Treatment Effectiveness Evaluation/ OR (measure\$ adj3 outcome\$.mp. OR (assessment\$ adj3 outcome\$.mp. OR (research\$ adj3 outcome\$.mp. OR (stud\$ adj3 outcome\$.mp. OR (assessment\$ adj3 patient\$ adj3 outcome\$.mp. OR (research\$ adj3 patient\$ adj3 outcome\$.mp. OR exp Risk-Taking/ OR exp Error Analysis/ OR (cause\$ adj3 root\$ adj3 analys\$.mp. OR exp "Side Effects (Drug)"/ OR (drug\$ adj3 side\$ adj3 effect\$.mp. OR (drug\$ adj3 toxic\$.mp. OR (drug\$ adj3 reaction\$ adj3 adverse\$.mp. OR (drug\$ adj3 event\$ adj3 adverse\$.mp. OR exp Toxic Disorders/ OR exp Injuries/ OR 3620.cc. [Personnel Management &amp; Selection &amp; Training classification code] OR 3630.cc. [Personnel Evaluation &amp; Job Performance classification code] OR 3650.cc. [Personnel Attitudes &amp; Job Satisfaction classification code] OR 3670.cc. [Working Conditions &amp; Industrial Safety classification code] OR 3430.cc. [Professional Personnel Attitudes &amp; Characteristics classification code] OR 3450.cc. [Professional Ethics &amp; Standards &amp; Liability code] OR 3470.cc. [Impaired Professionals classification code]]</p> |
| Embase    | <p>[exp Burnout/ OR burnout.mp. OR (burnout adj3 effect\$.mp.) AND [exp Physicians/ OR exp Psychiatry/ OR allergist\$.mp. OR anesthesiologist\$.mp. OR cardiologist\$.mp. OR clinical pharmacologist\$.mp. OR clinical toxicologist\$.mp. OR dermatologist\$.mp. OR doctor\$.mp. OR endocrinologist\$.mp. OR gastroenterologist\$.mp. OR gynecologist\$.mp. OR hematologist\$.mp. OR immunologist\$.mp. OR medical biochemist\$.mp. OR medical geneticist\$.mp. OR medical microbiologist\$.mp. OR nephrologist\$.mp. OR neurologist\$.mp. OR neuropathologist\$.mp. OR neuroradiologist\$.mp. OR occupational physician\$.mp. OR oncologist\$.mp. OR ophthalmologist\$.mp. OR pathologist\$.mp. OR pediatrician\$.mp. OR physician\$.mp. OR psychiatrist\$.mp. OR radiologist\$.mp. OR rheumatologist\$.mp. OR surgeon\$.mp. OR urologist\$.mp.] AND [exp Diagnostic Errors/ OR exp Medical Errors/ OR exp Medication Errors/ OR exp Health care quality/ OR exp Quality control/ OR misdiag\$.mp. OR (diagnos\$ adj3 error\$.mp. OR (medical\$ adj3 error\$.mp. OR (medication\$ adj3 error\$.mp. OR (drug\$ adj3 error\$.mp. OR (mistak\$ adj3 medic\$.mp. OR (surgic\$ adj3 error\$.mp. OR (quality\$ adj3 health\$ adj3 care\$.mp. OR (quality\$ adj3 healthcare\$.mp. OR (quality\$ adj3 of adj3 care\$.mp. OR exp Professional Competence/ OR (professional\$ adj3 competenc\$.mp. OR (technical\$ adj3 expertise\$.mp. OR (expertise\$ adj3 generaliz\$.mp. OR professionalism\$.mp. OR exp Treatment Outcome/ OR (treat\$ adj3 outcome\$.mp. OR (patient\$ adj3 outcome\$.mp. OR exp Malpractice/ OR (impair\$ adj3 physician\$.mp. OR (impair\$ adj3 doctor\$.mp. OR (disruptive\$ adj3 behav\$.mp. OR exp Safety/ OR safe\$.mp. OR exp Risk OR exp Risk Factors/ OR exp Risk Assessment/ OR exp Risk Management/ OR risk\$.mp. OR exp patient satisfaction/ OR (patient\$ adj3 satisf\$.mp. OR (client\$ adj3 satisf\$.mp. OR exp human relation/ OR (professional\$ adj3 patient\$ adj3 relation\$.mp. OR (client\$ adj3 contact\$.mp. OR exp doctor patient relation/ OR (physician\$ adj3 patient\$ adj3 relation\$.mp. OR (doctor\$ adj3 patient\$ adj3 relation\$.mp. OR exp interpersonal communication/ OR communicat\$.mp. OR misinform\$.mp. OR exp communication disorder/ OR exp communication skill/ OR exp health personnel attitude/ OR attitude\$.mp. OR exp clinical competence/ OR (clinical\$ adj3 competenc\$.mp. OR (clinical\$ adj3 skill\$.mp. OR exp patient care/ OR (patient\$ adj3 cent\$ adj3 care\$.mp. OR (patient\$ adj3 focus\$ adj3 care\$.mp. OR exp Empathy/ OR empath\$.mp. OR exp medical care/ OR (patient\$ adj3 care\$.mp. OR (informal\$ adj3 care\$.mp. OR exp professional standard/ OR (standard\$ adj3 care\$.mp. OR exp standard/ OR exp Self Efficacy/ OR efficacy\$.mp. OR exp medical</p>                                                                                                                                                                                                                                                                                                                                                                                                                                                                                                                                                                                                                                                                                                                                                                                                                                                                                                                                                                                                                                                                                                                                                                                                                                                                                                                                                                                                                                                                                                                                                                                                                                                                                                                                                                                                                                                                                                                                                                                                                                                                                                                                                                                                                                     |

| Database       | Search Terms                                                                                                                                                                                                                                                                                                                                                                                                                                                                                                                                                                                                                                                                                                                                                                                                                                                                                                                                                                                                                                                                                                                                                                                                                                                                                                                                                                                                                                                                                                                                                                                                                                                                                                                                                                                                                                                                                                                                                                                                             |
|----------------|--------------------------------------------------------------------------------------------------------------------------------------------------------------------------------------------------------------------------------------------------------------------------------------------------------------------------------------------------------------------------------------------------------------------------------------------------------------------------------------------------------------------------------------------------------------------------------------------------------------------------------------------------------------------------------------------------------------------------------------------------------------------------------------------------------------------------------------------------------------------------------------------------------------------------------------------------------------------------------------------------------------------------------------------------------------------------------------------------------------------------------------------------------------------------------------------------------------------------------------------------------------------------------------------------------------------------------------------------------------------------------------------------------------------------------------------------------------------------------------------------------------------------------------------------------------------------------------------------------------------------------------------------------------------------------------------------------------------------------------------------------------------------------------------------------------------------------------------------------------------------------------------------------------------------------------------------------------------------------------------------------------------------|
|                | <p>audit/ OR audit\$.mp. OR (diagnos\$ adj3 mistak\$).mp. OR (medication\$ adj3 mistak\$).mp. OR (drug\$ adj3 mistak\$).mp. OR (surgic\$ adj3 mistak\$).mp. OR (program\$ adj3 hazard\$ adj3 surveillance\$).mp. OR (management\$ adj3 safety\$).mp. OR (hazard\$ adj3 control\$).mp. OR (hazard\$ adj3 management\$).mp. OR malpractic\$.mp. OR negligen\$.mp. OR exp Morbidity/ OR morbidity\$.mp. OR exp postoperative complication/ OR (postoperative\$ adj3 complication\$).mp. OR exp Cross Infection/ OR (nosocomial\$ adj3 infection\$).mp. OR (hospital\$ adj3 infection\$).mp. OR (cross\$ adj3 infection\$).mp. OR exp clinical practice/ OR exp professional practice/ OR (practice\$ adj3 pattern\$ adj3 clinical\$).mp. OR (practice\$ adj3 pattern\$ adj3 physicians\$).mp. OR (prescribing\$ adj3 pattern\$ adj3 physician\$).mp. OR (practice\$ adj3 pattern\$ adj3 professional\$).mp. OR (practice\$ adj3 pattern\$ adj3 variation\$).mp. OR (practice\$ adj3 clinical\$ adj3 variation\$).mp. OR (practice\$ adj3 medical\$ adj3 variation\$).mp. OR exp mortality/ OR exp death/ OR (rate\$ adj3 age-specific\$ adj3 death\$).mp. OR (rate\$ adj3 death\$).mp. OR (rate\$ adj3 fatalit\$).mp. OR mortalit\$.mp. OR exp outcome assessment/ OR (measure\$ adj3 outcome\$).mp. OR (assessment\$ adj3 outcome\$).mp. OR (research\$ adj3 outcome\$).mp. OR (stud\$ adj3 outcome\$).mp. OR (assessment\$ adj3 patient\$ adj3 outcome\$).mp. OR (research\$ adj3 patient\$ adj3 outcome\$).mp. OR exp risk reduction/ OR exp high risk behavior/ OR exp "root cause analysis"/ OR (cause\$ adj3 root\$ adj3 analys\$).mp. OR exp adverse drug reaction/ OR (drug\$ adj3 side\$ adj3 effect\$).mp. OR (drug\$ adj3 toxic\$).mp. OR (drug\$ adj3 reaction\$ adj3 adverse\$).mp. OR (drug\$ adj3 event\$ adj3 adverse\$).mp. OR ae.fs. [adverse drug reaction] OR to.fs. [drug toxicity] OR dt.fs. [drug interaction subheading] OR si.fs. [side effect subheading] OR co.fs. [complication subheading]</p> |
| Web of Science | <p>[burn out* OR burnout*] AND [physician* OR clinician* OR psychiatry* OR allergist* OR anesthesiologist* OR cardiologist* OR clinical pharmacologist* OR clinical toxicologist* OR dermatologist* OR doctor* OR endocrinologist* OR gastroenterologist* OR gynecologist* OR hematologist* OR immunologist* OR medical biochemist* OR medical geneticist* OR medical microbiologist* OR nephrologist* OR neurologist* OR neuropathologist* OR neuroradiologist* OR occupational physician* OR oncologist* OR ophthalmologist* OR pathologist* OR pediatrician* OR physician* OR psychiatrist* OR radiologist* OR rheumatologist* OR surgeon* OR urologist* OR consultant*] AND [error* OR health* care* OR healthcare* OR quality* OR misdiag* OR mistak* OR competenc* OR expertis* OR professionalism* OR outcome* OR impair* OR disruptive* OR safe* OR risk* OR satisf* OR relation* OR contact* OR communicat* OR misinform* OR attitude* OR skill* OR care* OR empath* OR standard* OR audit* OR hazard* OR malpractic* OR negligen* OR morbidity* OR infection* OR practice* pattern* OR prescrib* pattern* OR mortalit* OR death* OR fatalit* OR drug* OR adverse* OR poison* OR toxic* OR injur*]</p>                                                                                                                                                                                                                                                                                                                                                                                                                                                                                                                                                                                                                                                                                                                                                                                                          |
